# Supplementary material for: DNA-Methylation and Body Composition in Preschool Children: Epigenome-Wide-Analysis in the European Childhood Obesity Project (CHOP)-Study
Source: Springer Nature journal article supplement (doi:10.1038/s41598-017-13099-4), 2017-10-24
Supplement: MOESM1 [file 41598_2017_13099_MOESM1_ESM.pdf › 41598_2017_13099_MOESM1_ESM.pdf]

## **DNA-Methylation and Body Composition in Children: Epigenome-Wide-Analysis in the European Childhood Obesity Project (CHOP)-Study**

Peter Rzehak, Marcela Covic, Richard Saffery, Eva Reischl, Simone Wahl, Veit Grote, Martina Weber, Annick Xhonneux, Jean-Paul Langhendries, Natalia Ferre, Ricardo Closa-Monasterolo, Joaquin Escribano, Elvira Verduci, Enrica Riva, Piotr Socha, Dariusz Gruszczyński and Berthold Koletzko

Supplementary Table S7: Gene ontology terms.<sup>1</sup>

|             | Pathway ID   | Pathway description                                                                 | Corrected P-value | Gene names                                                                               |
|-------------|--------------|-------------------------------------------------------------------------------------|-------------------|------------------------------------------------------------------------------------------|
| <b>BMI</b>  | GO:0007265   | Ras protein signal transduction                                                     | 1.23E-02          | FGFR2,CYTH4,FGF9,GRIN2D,SOS1,ARHGEF2,DUSP5,CDH13,DOK3,GNA12,FARP1,SPTBN4,DLC1,GRB2,NTRK1 |
|             | GO:0051493   | regulation of cytoskeleton organization                                             | 1.73E-02          | ABL1,TRIOBP,SMC3,ARHGEF2,TBCD,SNCA,HAUS6,SPTBN4,DLC1,GRB2,KIRREL                         |
|             | GO:0051494   | negative regulation of cytoskeleton organization                                    | 1.40E-02          | TRIOBP,SMC3,ARHGEF2,TBCD,SNCA,HAUS6,SPTBN4,DLC1                                          |
|             | GO:0060043   | regulation of cardiac muscle cell proliferation                                     | 4.03E-02          | FGFR2,TP73,FGF9,NKX2-5                                                                   |
|             | GO:0014855   | striated muscle cell proliferation                                                  | 1.98E-02          | CFLAR,FGFR2,TP73,FGF9,NKX2-5                                                             |
|             | GO:0051258   | protein polymerization                                                              | 3.51E-02          | ABL1,TRIOBP,TBCD,SNCA,SPTBN4,GRB2,KIRREL                                                 |
|             | GO:0032271   | regulation of protein polymerization                                                | 7.20E-03          | ABL1,TRIOBP,TBCD,SNCA,SPTBN4,GRB2,KIRREL                                                 |
|             | GO:0032272   | negative regulation of protein polymerization                                       | 4.75E-02          | TRIOBP,TBCD,SNCA,SPTBN4                                                                  |
|             | KEGG:04010   | MAPK signaling pathway                                                              | 1.79E-04          | FGFR2,FGF9,SOS1,ECSIT,DUSP5,MAPK8IP3,GNA12,PTPRR,GRB2,CACNA1E,NTRK1                      |
|             | KEGG:04722   | Neurotrophin signaling pathway                                                      | 4.24E-03          | TP73,ABL1,SOS1,GRB2,NTRK1                                                                |
|             | KEGG:05200   | Pathways in cancer                                                                  | 1.15E-02          | FGFR2,GLI2,ABL1,FGF9,SOS1,CTBP2,GRB2,NTRK1                                               |
|             | KEGG:05220   | Chronic myeloid leukemia                                                            | 5.34E-03          | ABL1,SOS1,CTBP2,GRB2                                                                     |
|             | KEGG:04014   | Ras signaling pathway                                                               | 2.20E-03          | FGFR2,ABL1,FGF9,RAB5C,SOS1,MLLT4,GRB2                                                    |
|             | REAC:5655332 | Signaling by FGFR3 in disease                                                       | 3.01E-02          | FGF9,SOS1,GRB2                                                                           |
|             | REAC:8853338 | Signaling by FGFR3 point mutants in cancer                                          | 3.01E-02          | FGF9,SOS1,GRB2                                                                           |
|             | REAC:5654699 | SHC-mediated cascade:FGFR2                                                          | 4.24E-03          | FGFR2,FGF9,SOS1,GRB2                                                                     |
|             | REAC:5654704 | SHC-mediated cascade:FGFR3                                                          | 1.61E-02          | FGF9,SOS1,GRB2                                                                           |
|             | REAC:5654688 | SHC-mediated cascade:FGFR1                                                          | 2.60E-02          | FGF9,SOS1,GRB2                                                                           |
|             | REAC:5654719 | SHC-mediated cascade:FGFR4                                                          | 3.45E-02          | FGF9,SOS1,GRB2                                                                           |
|             | REAC:5655253 | Signaling by FGFR2 in disease                                                       | 3.26E-02          | FGFR2,FGF9,SOS1,GRB2                                                                     |
| <b>FM</b>   | GO:0033002   | muscle cell proliferation                                                           | 1.60E-02          | CFLAR,TP73,NKX2-5,PRKDC                                                                  |
|             | GO:0014855   | striated muscle cell proliferation                                                  | 2.54E-02          | CFLAR,TP73,NKX2-5                                                                        |
|             | GO:0048536   | spleen development                                                                  | 2.78E-02          | JARID2,ABL1,CACNB4,NKX2-5,PRKDC                                                          |
|             | GO:0002320   | lymphoid progenitor cell differentiation                                            | 3.35E-02          | SOS1,PRKDC                                                                               |
|             | GO:0002328   | pro-B cell differentiation                                                          | 9.87E-03          | SOS1,PRKDC                                                                               |
|             | KEGG:04722   | Neurotrophin signaling pathway                                                      | 2.98E-02          | RPS6KA2,TP73,ABL1,SOS1,NTRK1                                                             |
|             | KEGG:04014   | Ras signaling pathway                                                               | 1.52E-02          | GNB1,ABL1,FGF9,RAB5C,ZAP70,SOS1,MLLT4,GNG4,GRB2                                          |
|             | REAC:112308  | Depolarization of the Presynaptic Terminal Triggers the Opening of Calcium Channels | 3.97E-02          | CACNB1,CACNB4,CACNA1E                                                                    |
|             | REAC:112316  | Neuronal System                                                                     | 1.53E-03          | CACNB1,RPS6KA2,GNB1,GRIN2D,KCNQ4,LRFN1,PTPRF,KCNH1,GNG4,KCNJ10,CACNB4,CACNA1E            |
| <b>FMI</b>  | GO:0002328   | pro-B cell differentiation                                                          | 2.49E-02          | SOS1,PRKDC                                                                               |
| <b>FFM</b>  | GO:0061037   | negative regulation of cartilage development                                        | 2.71E-02          | GLI2,TGFB2,BMP4                                                                          |
|             | GO:0014013   | regulation of gliogenesis                                                           | 1.33E-02          | TP73,BMP4,MLLT4                                                                          |
|             | GO:0042476   | odontogenesis                                                                       | 2.32E-02          | GLI2,TGFB2,GLI3,BMP4,EDAR,MSX1                                                           |
|             | GO:0021520   | spinal cord motor neuron cell fate specification                                    | 4.04E-02          | GLI2,GLI3,ISL2                                                                           |
|             | GO:0048663   | neuron fate commitment                                                              | 1.60E-02          | GLI2,TGFB2,BMP4,ISL2                                                                     |
|             | GO:0045926   | negative regulation of growth                                                       | 4.28E-02          | TP73,TGFB2,TLL2,STC2,BMP4,SQSTM1,MSX1                                                    |
|             | KEGG:04390   | Hippo signaling pathway                                                             | 1.64E-02          | GLI2,TP73,TGFB2,BMP4                                                                     |
| <b>FFMI</b> | GO:0035303   | regulation of dephosphorylation                                                     | 4.43E-02          | NUAK1,FARP1                                                                              |
|             | GO:0035304   | regulation of protein dephosphorylation                                             | 4.10E-02          | NUAK1,FARP1                                                                              |
|             | GO:0010921   | regulation of phosphatase activity                                                  | 3.03E-02          | NUAK1,FARP1                                                                              |
|             | GO:0045177   | apical part of cell                                                                 | 9.13E-03          | FOLR1,MLLT4,AJAP1                                                                        |

**Supplementary Table S8: Methylation variants within the same genes in pre-school children of the CHOP study (BMI) and older children in the study of Huang.<sup>2</sup>**

| EWAS-BMI |                               |            | CHOP |                  |                                                  |                        | Huang et.al. 2015 <sup>2</sup>                  |            |     |                    |                   |                 |                        |
|----------|-------------------------------|------------|------|------------------|--------------------------------------------------|------------------------|-------------------------------------------------|------------|-----|--------------------|-------------------|-----------------|------------------------|
| Gene     | Rank<br># of 212<br>FDR sign. | CpG ID     | CHR  | Position<br>(bp) | Change (SE)<br>in BMI<br>per % change<br>in DNAm | uncorrected<br>P-value | Rank<br># of 1879 with<br>5% DNAm<br>difference | CpG ID     | CHR | Position *<br>(bp) | % DNAm<br>control | % DNAm<br>obese | uncorrected<br>P-value |
| ANKRD11  | 40                            | cg26666886 | 16   | 89558024         | -0.32 (0.07)                                     | 3.37E-06               | 1715                                            | cg06159562 | 16  | 89424790           | 0.4192            | 0.5062          | 0.0434                 |
|          | 59                            | cg27267258 | 16   | 89359175         | 0.35 (0.07)                                      | 5.06E-06               | 301                                             | cg27660627 | 16  | 89461800           | 0.5852            | 0.5303          | 0.0048                 |
| BAT2     | 124                           | cg22503047 | 6    | 31601411         | -0.30 (0.07)                                     | 1.20E-05               | 1632                                            | cg18685724 | 6   | 31587910           | 0.4091            | 0.4914          | 0.0403                 |
| C2orf85  | 195                           | cg09034753 | 2    | 242810748        | 0.09 (0.02)                                      | 2.22E-05               | 869                                             | cg11654325 | 2   | 243000000          | 0.611             | 0.6644          | 0.017                  |
|          |                               |            |      |                  |                                                  |                        | 728                                             | cg23491841 | 2   | 243000000          | 0.5682            | 0.6371          | 0.0139                 |
| C4orf22  | 202                           | cg02256198 | 4    | 81306753         | 0.21 (0.05)                                      | 2.30E-05               | 1554                                            | cg23548438 | 4   | 81257820           | 0.542             | 0.4908          | 0.038                  |
| CCNL2    | 114                           | cg04880874 | 1    | 1322461          | 0.26 (0.06)                                      | 1.12E-05               | 1871                                            | cg24837149 | 1   | 1333778            | 0.3151            | 0.2411          | 0.0495                 |
|          |                               |            |      |                  |                                                  |                        | 196                                             | cg24849049 | 1   | 156000000          | 0.6748            | 0.6189          | 0.0031                 |
| CCR6     | 15                            | cg14391016 | 6    | 167523797        | 0.24 (0.05)                                      | 1.06E-06               | 1055                                            | cg13615963 | 6   | 168000000          | 0.1975            | 0.1446          | 0.0216                 |
| CDH13    | 197                           | cg16777782 | 16   | 82671333         | -0.24 (0.06)                                     | 2.23E-05               | 1869                                            | cg09044981 | 16  | 82827680           | 0.8276            | 0.7591          | 0.0494                 |
| CNGA3    | 84                            | cg25734624 | 2    | 99013247         | 0.19 (0.04)                                      | 7.28E-06               | 1182                                            | cg11959694 | 2   | 98962560           | 0.5306            | 0.5822          | 0.0252                 |
| DIABLO   | 127                           | cg10802680 | 12   | 122712075        | 0.15 (0.03)                                      | 1.23E-05               | 704                                             | cg19529732 | 12  | 123000000          | 0.5232            | 0.5773          | 0.0133                 |
|          |                               |            |      |                  |                                                  |                        | 106                                             | cg21805118 | 12  | 123000000          | 0.6445            | 0.7013          | 0.0016                 |
| FAM188B  | 123                           | cg07831312 | 7    | 30855293         | -0.16 (0.04)                                     | 1.20E-05               | 1004                                            | cg07136111 | 7   | 30829000           | 0.4717            | 0.4098          | 0.0201                 |
| FGFR2    | 128                           | cg14834653 | 10   | 123353791        | -0.18 (0.04)                                     | 1.24E-05               | 1472                                            | cg02210151 | 10  | 123000000          | 0.5832            | 0.6616          | 0.0349                 |
| FOXK2    | 47                            | cg05945266 | 17   | 80545020         | 0.24 (0.05)                                      | 3.89E-06               | 907                                             | cg02116768 | 17  | 80545320           | 0.4588            | 0.363           | 0.018                  |
| GNA12    | 179                           | cg24824703 | 7    | 2801248          | 0.19 (0.04)                                      | 1.97E-05               | 215                                             | cg16569650 | 7   | 2773072            | 0.6423            | 0.5858          | 0.0035                 |
| HIPK2    | 117                           | cg03520802 | 7    | 139273697        | 0.12 (0.03)                                      | 1.15E-05               | 1121                                            | cg15039797 | 7   | 139000000          | 0.8082            | 0.8597          | 0.0232                 |
| IGF2R    | 191                           | cg19196862 | 6    | 160491078        | -0.25 (0.06)                                     | 2.17E-05               | 224                                             | cg09555124 | 6   | 160000000          | 0.7605            | 0.8191          | 0.0036                 |
| INPP5A   | 199                           | cg08552167 | 10   | 134560109        | -0.28 (0.07)                                     | 2.29E-05               | 1848                                            | cg01040749 | 10  | 134000000          | 0.7154            | 0.6511          | 0.0485                 |
|          |                               |            |      |                  |                                                  |                        | 487                                             | cg09163720 | 10  | 134000000          | 0.66              | 0.5872          | 0.0086                 |
| MACROD1  | 100                           | cg20219100 | 11   | 63776397         | 0.26 (0.06)                                      | 8.84E-06               | 659                                             | cg10675058 | 11  | 63858880           | 0.6102            | 0.5397          | 0.0122                 |
| MEGF11   | 190                           | cg11841546 | 15   | 66195556         | -0.26 (0.06)                                     | 2.14E-05               | 835                                             | cg00682263 | 15  | 66188800           | 0.5975            | 0.4801          | 0.0163                 |
| NPSR1    | 17                            | cg14401837 | 7    | 34697493         | -0.24 (0.05)                                     | 1.26E-06               | 1183                                            | cg17220237 | 7   | 34911380           | 0.8167            | 0.758           | 0.0252                 |
| RAB5C    | 18                            | cg17989572 | 17   | 40306700         | -0.50 (0.10)                                     | 1.32E-06               | 338                                             | cg00435173 | 17  | 40284050           | 0.5646            | 0.5127          | 0.0054                 |
| SFMBT2   | 56                            | cg12717591 | 10   | 7205138          | 0.42 (0.09)                                      | 4.74E-06               | 209                                             | cg05103064 | 10  | 7311500            | 0.7742            | 0.8312          | 0.0034                 |
|          | 130                           | cg19104196 | 10   | 7214172          | 0.25 (0.06)                                      | 1.28E-05               | 209                                             | cg05103064 | 10  | 7311500            | 0.7742            | 0.8312          | 0.0034                 |
| TBCD     | 139                           | cg18699524 | 17   | 80765560         | 0.24 (0.05)                                      | 1.37E-05               | 1866                                            | cg22175624 | 17  | 80829260           | 0.7176            | 0.7735          | 0.0493                 |
|          | 9                             | cg27285599 | 17   | 80798023         | 0.34 (0.07)                                      | 7.76E-07               | 1866                                            | cg22175624 | 17  | 80829260           | 0.7176            | 0.7735          | 0.0493                 |
| TRIM39   | 94                            | cg01363869 | 6    | 30309848         | -0.17 (0.04)                                     | 8.28E-06               | 1482                                            | cg03094134 | 6   | 30297170           | 0.4733            | 0.4204          | 0.0353                 |
|          |                               |            |      |                  |                                                  |                        | 1633                                            | cg21426759 | 6   | 30303130           | 0.6424            | 0.5747          | 0.0403                 |

\* Positions as listed in Huang 2015, Supplementary Table 2..<sup>2</sup>

**Supplementary Table S9: Methylation variants within the same genes in pre-school children of the CHOP study (FM) and older children in the study of Huang.<sup>2</sup>**

| EWAS-FM |                               | CHOP       |     |                  |                                                 |                        | Huang et al. 2015                               |            |     |                    |                   |                 |                        |
|---------|-------------------------------|------------|-----|------------------|-------------------------------------------------|------------------------|-------------------------------------------------|------------|-----|--------------------|-------------------|-----------------|------------------------|
| Gene    | Rank<br># of 230<br>FDR sign. | CpG ID     | CHR | Position<br>(bp) | Change (SE)<br>in FM<br>per % change<br>in DNAm | uncorrected<br>P-value | Rank<br># of 1879 with<br>5% DNAm<br>difference | CpG ID     | CHR | Position *<br>(bp) | % DNAm<br>control | % DNAm<br>obese | uncorrected<br>P-value |
| ANKRD11 | 84                            | cg26666886 | 16  | 89558024         | -0.25 (0.05)                                    | 7.43E-06               | 1715                                            | cg06159562 | 16  | 89424790           | 0.4192            | 0.5062          | 0.0434                 |
|         |                               |            |     |                  |                                                 |                        | 301                                             | cg27660627 | 16  | 89461800           | 0.5852            | 0.5303          | 0.0048                 |
| BAT2    | 135                           | cg22503047 | 6   | 31601411         | -0.25 (0.06)                                    | 1.38E-05               | 1632                                            | cg18685724 | 6   | 31587910           | 0.4091            | 0.4914          | 0.0403                 |
| BCL11A  | 152                           | cg23718924 | 2   | 60778617         | -0.30 (0.07)                                    | 1.57E-05               | 1699                                            | cg16951074 | 2   | 60755360           | 0.6608            | 0.6052          | 0.0428                 |
|         |                               |            |     |                  |                                                 |                        | 1074                                            | cg24361098 | 2   | 60748950           | 0.5167            | 0.5881          | 0.0219                 |
| CCR6    | 110                           | cg14391016 | 6   | 167523797        | 0.17 (0.04)                                     | 1.10E-05               | 1055                                            | cg13615963 | 6   | 168000000          | 0.1975            | 0.1446          | 0.0216                 |
| CNGA3   | 62                            | cg25734624 | 2   | 99013247         | 0.16 (0.03)                                     | 4.77E-06               | 1182                                            | cg11959694 | 2   | 98962560           | 0.5306            | 0.5822          | 0.0252                 |
| CYFIP1  | 43                            | cg10413089 | 15  | 22921426         | 0.20 (0.04)                                     | 3.24E-06               | 1377                                            | cg11403739 | 15  | 22923740           | 0.3569            | 0.4211          | 0.0315                 |
|         |                               |            |     |                  |                                                 |                        | 922                                             | cg12759523 | 15  | 22923500           | 0.6017            | 0.6879          | 0.0184                 |
|         |                               |            |     |                  |                                                 |                        | 282                                             | cg12792931 | 14  | 77499160           | 0.4932            | 0.5492          | 0.0046                 |
|         |                               |            |     |                  |                                                 |                        | 272                                             | cg17896808 | 15  | 22992840           | 0.7177            | 0.7723          | 0.0044                 |
| FO XK2  | 157                           | cg05945266 | 17  | 80545020         | 0.18 (0.04)                                     | 1.60E-05               | 907                                             | cg02116768 | 17  | 80545320           | 0.4588            | 0.363           | 0.018                  |
| FO XK2  | 50                            | cg19392175 | 17  | 80554772         | 0.15 (0.03)                                     | 3.65E-06               | 1867                                            | cg02141929 | 16  | 56681540           | 0.6849            | 0.7449          | 0.0493                 |
| JARID2  | 68                            | cg14388804 | 6   | 15521099         | 0.25 (0.05)                                     | 5.54E-06               | 1640                                            | cg18188328 | 6   | 15505090           | 0.6423            | 0.5853          | 0.0407                 |
| MCF2L   | 229                           | cg22699527 | 13  | 113714917        | -0.52 (0.12)                                    | 2.64E-05               | 1133                                            | cg05669497 | 13  | 114000000          | 0.2208            | 0.1561          | 0.0237                 |
| MEGF11  | 230                           | cg11841546 | 15  | 66195556         | -0.20 (0.05)                                    | 2.66E-05               | 835                                             | cg00682263 | 15  | 66188800           | 0.5975            | 0.4801          | 0.0163                 |
| MLLT4   | 78                            | cg06640020 | 6   | 168352700        | -0.32 (0.07)                                    | 6.93E-06               | 362                                             | cg00686132 | 6   | 168000000          | 0.6269            | 0.545           | 0.0058                 |
| NPSR1   | 16                            | cg14401837 | 7   | 34697493         | -0.21 (0.04)                                    | 5.74E-07               | 1183                                            | cg17220237 | 7   | 34911380           | 0.8167            | 0.758           | 0.0252                 |
| PRKDC   | 7                             | cg04894009 | 8   | 48695125         | 0.32 (0.06)                                     | 1.78E-07               | 1309                                            | cg11773920 | 8   | 48686400           | 0.678             | 0.7307          | 0.0292                 |
| PTPRN2  | 116                           | cg24093300 | 7   | 157543805        | -0.14 (0.03)                                    | 1.20E-05               | 179                                             | cg00280858 | 7   | 158000000          | 0.7191            | 0.6655          | 0.0028                 |
|         |                               |            |     |                  |                                                 |                        | 245                                             | cg11111139 | 7   | 158000000          | 0.5867            | 0.5297          | 0.004                  |
|         |                               |            |     |                  |                                                 |                        | 697                                             | cg13736939 | 7   | 158000000          | 0.5262            | 0.4651          | 0.013                  |
| RAB5C   | 59                            | cg17989572 | 17  | 40306700         | -0.38 (0.08)                                    | 4.60E-06               | 338                                             | cg00435173 | 17  | 40284050           | 0.5646            | 0.5127          | 0.0054                 |
| RERE    | 224                           | cg26915618 | 1   | 8427379          | 0.25 (0.06)                                     | 2.54E-05               | 395                                             | cg23963229 | 1   | 8725074            | 0.8811            | 0.9472          | 0.0065                 |
| RPS6KA2 | 120                           | cg01577646 | 6   | 166911121        | -0.13 (0.03)                                    | 1.26E-05               | 1541                                            | cg08557970 | 6   | 167000000          | 0.4913            | 0.438           | 0.0375                 |
| SFMBT2  | 26                            | cg12717591 | 10  | 7205138          | 0.36 (0.07)                                     | 1.62E-06               | 209                                             | cg05103064 | 10  | 7311500            | 0.7742            | 0.8312          | 0.0034                 |
|         |                               |            |     |                  |                                                 |                        | 209                                             | cg05103064 | 10  | 7311500            | 0.7742            | 0.8312          | 0.0034                 |
| TBCD    | 128                           | cg27285599 | 17  | 80798023         | 0.24 (0.05)                                     | 1.34E-05               | 1866                                            | cg22175624 | 17  | 80829260           | 0.7176            | 0.7735          | 0.0493                 |
| TNXB    | 204                           | cg25270367 | 6   | 32022898         | -0.02 (0.00)                                    | 2.28E-05               | 1673                                            | cg00872984 | 6   | 32063990           | 0.4172            | 0.4836          | 0.0421                 |
|         |                               |            |     |                  |                                                 |                        | 1280                                            | cg07524919 | 6   | 32063900           | 0.4017            | 0.49            | 0.0284                 |
|         |                               |            |     |                  |                                                 |                        | 548                                             | cg10365886 | 6   | 32063870           | 0.5771            | 0.6565          | 0.0098                 |
| TRAPPC9 | 212                           | cg24841559 | 8   | 141034008        | 0.19 (0.04)                                     | 2.36E-05               | 137                                             | cg14188106 | 6   | 32063900           | 0.4143            | 0.5163          | 0.0021                 |
|         |                               |            |     |                  |                                                 |                        | 803                                             | cg16191297 | 8   | 141000000          | 0.7429            | 0.8567          | 0.0156                 |
|         |                               |            |     |                  |                                                 |                        | 1482                                            | cg03094134 | 6   | 30297170           | 0.4733            | 0.4204          | 0.0353                 |
| TRIM39  | 169                           | cg01363869 | 6   | 30309848         | -0.13 (0.03)                                    | 1.78E-05               | 1633                                            | cg21426759 | 6   | 30303130           | 0.6424            | 0.5747          | 0.0403                 |

\* Positions as listed in Huang 2015, Supplementary Table 2..<sup>2</sup>

**Supplementary Table S10: Methylation variants within the same genes in pre-school children of the CHOP study (FMI) and older children in the study of Huang.** <sup>2</sup>

| EWAS-FMI      |                              |            | CHOP |                  |                                                 |                        | Huang et. al. 2015                              |            |     |                    |                   |                 |                        |
|---------------|------------------------------|------------|------|------------------|-------------------------------------------------|------------------------|-------------------------------------------------|------------|-----|--------------------|-------------------|-----------------|------------------------|
| Gene          | Rank<br># of 24<br>FDR sign. | CpG ID     | CHR  | Position<br>(bp) | Change (SE)<br>in FM<br>per % change<br>in DNAm | uncorrected<br>P-value | Rank<br># of 1879 with<br>5% DNAm<br>difference | CpG ID     | CHR | Position *<br>(bp) | % DNAm<br>control | % DNAm<br>obese | uncorrected<br>P-value |
| <i>CYFIP1</i> | 23                           | cg10413089 | 15   | 22921426         | 0.13 (0.03)                                     | 2.51E-06               | 1377                                            | cg11403739 | 15  | 22923740           | 0.3569            | 0.4211          | 0.0315                 |
|               |                              |            |      |                  |                                                 |                        | 922                                             | cg12759523 | 15  | 22923500           | 0.6017            | 0.6879          | 0.0184                 |
|               |                              |            |      |                  |                                                 |                        | 272                                             | cg17896808 | 15  | 22992840           | 0.7177            | 0.7723          | 0.0044                 |
| <i>DUSP5</i>  | 24                           | cg06322432 | 10   | 112289853        | 0.07 (0.01)                                     | 2.70E-06               | 1043                                            | cg18756771 | 10  | 112000000          | 0.7675            | 0.7108          | 0.0212                 |
| <i>NPSR1</i>  | 6                            | cg14401837 | 7    | 34697493         | -0.15 (0.03)                                    | 1.59E-07               | 1183                                            | cg17220237 | 7   | 34911380           | 0.8167            | 0.758           | 0.0252                 |
| <i>PRKDC</i>  | 10                           | cg04894009 | 8    | 48695125         | 0.21 (0.04)                                     | 3.60E-07               | 1309                                            | cg11773920 | 8   | 48686400           | 0.678             | 0.7307          | 0.0292                 |
| <i>SFMBT2</i> | 19                           | cg12717591 | 10   | 7205138          | 0.24 (0.05)                                     | 1.78E-06               | 209                                             | cg05103064 | 10  | 7311500            | 0.7742            | 0.8312          | 0.0034                 |

\* Positions as listed in Huang 2015, Supplementary Table 2..<sup>2</sup>

**Supplementary Table S11: Methylation variants within the same genes in pre-school children of the CHOP study (FFM) and older children in the study of Huang.** <sup>2</sup>

| EWAS-FFM       |                               |            | CHOP |                  |                                                 |                        | Huang et al. 2015                                  |            |     |                    |                   |                 |                        |
|----------------|-------------------------------|------------|------|------------------|-------------------------------------------------|------------------------|----------------------------------------------------|------------|-----|--------------------|-------------------|-----------------|------------------------|
| Gene           | Rank<br># of 120<br>FDR sign. | CpG ID     | CHR  | Position<br>(bp) | Change (SE)<br>in FM<br>per % change<br>in DNAm | uncorrected<br>P-value | Rank<br># of 1879<br>with 5%<br>DNAm<br>difference | CpG ID     | CHR | Position *<br>(bp) | % DNAm<br>control | % DNAm<br>obese | uncorrected<br>P-value |
| <i>CCR6</i>    | 38                            | cg14391016 | 6    | 167523797        | 0.25 (0.05)                                     | 3.81E-06               | 1055                                               | cg13615963 | 6   | 168000000          | 0.1975            | 0.1446          | 0.0216                 |
| <i>FOXK2</i>   | 92                            | cg19392175 | 17   | 80554772         | 0.19 (0.04)                                     | 1.03E-05               | 907                                                | cg02116768 | 17  | 80545320           | 0.4588            | 0.363           | 0.018                  |
| <i>INPP5A</i>  | 59                            | cg09602753 | 10   | 134574192        | -0.31 (0.07)                                    | 6.74E-06               | 1848                                               | cg01040749 | 10  | 134000000          | 0.7154            | 0.6511          | 0.0485                 |
|                |                               |            |      |                  |                                                 |                        | 487                                                | cg09163720 | 10  | 134000000          | 0.66              | 0.5872          | 0.0086                 |
| <i>MAD1L1</i>  | 85                            | cg05985070 | 7    | 2050170          | -0.20 (0.04)                                    | 9.59E-06               | 1714                                               | cg05095590 | 7   | 2139259            | 0.5284            | 0.5866          | 0.0434                 |
|                |                               |            |      |                  |                                                 |                        | 1349                                               | cg18650626 | 7   | 1914073            | 0.8267            | 0.8891          | 0.0308                 |
| <i>MLLT4</i>   | 2                             | cg08074767 | 6    | 168113741        | -0.15 (0.03)                                    | 2.91E-08               | 362                                                | cg00686132 | 6   | 168000000          | 0.6269            | 0.545           | 0.0058                 |
| <i>MXD3</i>    | 114                           | cg04586126 | 5    | 176734633        | 0.15 (0.03)                                     | 1.33E-05               | 1768                                               | cg25213720 | 5   | 177000000          | 0.4232            | 0.3494          | 0.0455                 |
| <i>PTPRN2</i>  | 66                            | cg26075417 | 7    | 157544211        | 0.57 (0.13)                                     | 7.86E-06               | 179                                                | cg00280858 | 7   | 158000000          | 0.7191            | 0.6655          | 0.0028                 |
|                |                               |            |      |                  |                                                 |                        | 245                                                | cg11111139 | 7   | 158000000          | 0.5867            | 0.5297          | 0.004                  |
|                |                               |            |      |                  |                                                 |                        | 697                                                | cg13736939 | 7   | 158000000          | 0.5262            | 0.4651          | 0.013                  |
|                |                               |            |      |                  |                                                 |                        | 1541                                               | cg08557970 | 6   | 167000000          | 0.4913            | 0.438           | 0.0375                 |
| <i>RPS6KA2</i> | 9                             | cg01577646 | 6    | 166911121        | -0.21 (0.04)                                    | 6.85E-07               | 1673                                               | cg00872984 | 6   | 32063990           | 0.4172            | 0.4836          | 0.0421                 |
| <i>TNXB</i>    | 48                            | cg04147642 | 6    | 32054659         | 0.19 (0.04)                                     | 5.22E-06               | 548                                                | cg10365886 | 6   | 32063870           | 0.5771            | 0.6565          | 0.0098                 |
|                |                               |            |      |                  |                                                 |                        | 137                                                | cg14188106 | 6   | 32063900           | 0.4143            | 0.5163          | 0.0021                 |

\* Positions as listed in Huang 2015, Supplementary Table 2..<sup>2</sup>

Supplementary Table S12: Methylation variants within the same genes in pre-school children of the CHOP study (FFMI) and older children in the study of Huang. <sup>2</sup>

| EWAS-<br>FFMI |                              | CHOP       |     |                  |                                                 |                                | Huang et al. 2015                                  |            |     |                    |                   |                 |                                |
|---------------|------------------------------|------------|-----|------------------|-------------------------------------------------|--------------------------------|----------------------------------------------------|------------|-----|--------------------|-------------------|-----------------|--------------------------------|
| Gene          | Rank<br># of 15<br>FDR sign. | CpG ID     | CHR | Position<br>(bp) | Change (SE)<br>in FM<br>per % change<br>in DNAm | uncorrected<br><i>P</i> -value | Rank<br># of 1879<br>with 5%<br>DNAm<br>difference | CpG ID     | CHR | Position *<br>(bp) | % DNAm<br>control | % DNAm<br>obese | uncorrected<br><i>P</i> -value |
| <i>MLLT4</i>  | 5                            | cg08074767 | 6   | 168113741        | -0.07 (0.01)                                    | 4.71E-07                       | 362                                                | cg00686132 | 6   | 168000000          | 0.6269            | 0.545           | 0.0058                         |

\* Positions as listed in Huang 2015, Supplementary Table 2..<sup>2</sup>

**Supplementary Table S13: Methylation variants within the same genes in pre-school children of the CHOP study (BMI) and adults in the study of Wahl.** <sup>3</sup>

| EWAS-BMI       |                               | CHOP       |     |                  |                                                  |                        | Wahl et al. 2017              |            |     |                  |                                                    |                        |
|----------------|-------------------------------|------------|-----|------------------|--------------------------------------------------|------------------------|-------------------------------|------------|-----|------------------|----------------------------------------------------|------------------------|
| Gene           | Rank<br># of 212<br>FDR sign. | CpG ID     | CHR | Position<br>(bp) | Change (SE)<br>in BMI<br>per % change<br>in DNAm | uncorrected<br>P-value | Rank<br># of 187<br>validated | CpG ID     | CHR | Position<br>(bp) | Change (SE)<br>in BMI<br>per % change *<br>in DNAm | uncorrected<br>P-value |
| <i>ANKRD11</i> | 40                            | cg26666886 | 16  | 89558024         | -0.32 (0.07)                                     | 3.37E-06               | 95                            | cg08726900 | 16  | 89550474         | -0.10 (0.02)                                       | 2.00E-09               |
| <i>ANKRD11</i> | 59                            | cg27267258 | 16  | 89359175         | 0.35 (0.07)                                      | 5.06E-06               | 95                            | cg08726900 | 16  | 89550474         | -0.10 (0.02)                                       | 2.00E-09               |
| <i>USP22</i>   | 105                           | cg22078907 | 17  | 20920756         | 0.32 (0.07)                                      | 9.45E-06               | 121                           | cg25649826 | 17  | 20938740         | 0.17 (0.03)                                        | 8.90E-09               |
| <i>ZC3H3</i>   | 125                           | cg13153009 | 8   | 144561626        | -0.67 (0.15)                                     | 1.20E-05               | 57                            | cg26361535 | 8   | 144576604        | 0.11 (0.02)                                        | 1.40E-10               |

\*) original estimate and SE were scaled to a 1% change by dividing original estimate by 100 to ease comparison with the CHOP study.

**Supplementary Table S14: Methylation variants within the same genes in pre-school children of the CHOP study (FM) and adults in the study of Wahl.** <sup>3</sup>

| EWAS-FM        |                               | CHOP       |     |                  |                                                 |                        | Wahl et al. 2017              |            |     |                  |                                                    |                        |
|----------------|-------------------------------|------------|-----|------------------|-------------------------------------------------|------------------------|-------------------------------|------------|-----|------------------|----------------------------------------------------|------------------------|
| Gene           | Rank<br># of 230<br>FDR sign. | CpG ID     | CHR | Position<br>(bp) | Change (SE)<br>in FM<br>per % change<br>in DNAm | uncorrected<br>P-value | Rank<br># of 187<br>validated | CpG ID     | CHR | Position<br>(bp) | Change (SE)<br>in BMI<br>per % change *<br>in DNAm | uncorrected<br>P-value |
| <i>ANKRD11</i> | 84                            | cg26666886 | 16  | 89558024         | -0.25 (0.05)                                    | 7.43E-06               | 95                            | cg08726900 | 16  | 89550474         | -0.10 (0.02)                                       | 2.00E-09               |
| <i>JARID2</i>  | 68                            | cg14388804 | 6   | 15521099         | 0.25 (0.05)                                     | 5.54E-06               | 120                           | cg10975897 | 6   | 15504844         | -0.13 (0.02)                                       | 8.20E-09               |
| <i>RPS6KA2</i> | 120                           | cg01577646 | 6   | 166911121        | -0.13 (0.03)                                    | 1.26E-05               | 7                             | cg17501210 | 6   | 166970252        | -0.18 (0.02)                                       | 8.20E-19               |
| <i>SLC41A1</i> | 202                           | cg26866142 | 1   | 205779678        | 0.35 (0.08)                                     | 2.28E-05               | 60                            | cg10717869 | 1   | 205780912        | 0.21 (0.03)                                        | 1.80E-10               |
| <i>ZC3H3</i>   | 23                            | cg13153009 | 8   | 144561626        | -0.59 (0.12)                                    | 1.28E-06               | 57                            | cg26361535 | 8   | 144576604        | 0.11 (0.02)                                        | 1.40E-10               |

\*) original estimate and SE were scaled to a 1% change by dividing original estimate by 100 to ease comparison with the CHOP study.

**Supplementary Table S15: Methylation variants within the same genes in pre-school children of the CHOP study (FMI) and adults in the study of Wahl.** <sup>3</sup>

| EWAS-FMI |                              | CHOP       |     |                  |                                                  |                        | Wahl et al. 2017              |            |     |                  |                                                    |                        |
|----------|------------------------------|------------|-----|------------------|--------------------------------------------------|------------------------|-------------------------------|------------|-----|------------------|----------------------------------------------------|------------------------|
| Gene     | Rank<br># of 24<br>FDR sign. | CpG ID     | CHR | Position<br>(bp) | Change (SE)<br>in FMI<br>per % change<br>in DNAm | uncorrected<br>P-value | Rank<br># of 187<br>validated | CpG ID     | CHR | Position<br>(bp) | Change (SE)<br>in BMI<br>per % change *<br>in DNAm | uncorrected<br>P-value |
| SMC3     | 24                           | cg06322432 | 10  | 112289853        | 0.07 (0.01)                                      | 2.70E-06               | 159                           | cg26878209 | 10  | 112375475        | 0.15 (0.03)                                        | 4.30E-08               |

\*) original estimate and SE were scaled to a 1% change by dividing original estimate by 100 to ease comparison with the CHOP study.

**Supplementary Table S16: Methylation variants within the same genes in pre-school children of the CHOP study (FFM) and adults in the study of Wahl. <sup>3</sup>**

| EWAS-FFM       |                               | CHOP       |     |                  |                                                  |                                | Wahl et al. 2017              |            |     |                  |                                                    |                                |
|----------------|-------------------------------|------------|-----|------------------|--------------------------------------------------|--------------------------------|-------------------------------|------------|-----|------------------|----------------------------------------------------|--------------------------------|
| Gene           | Rank<br># of 120<br>FDR sign. | CpG ID     | CHR | Position<br>(bp) | Change (SE)<br>in FFM<br>per % change<br>in DNAm | uncorrected<br><i>P</i> -value | Rank<br># of 187<br>validated | CpG ID     | CHR | Position<br>(bp) | Change (SE)<br>in BMI<br>per % change *<br>in DNAm | uncorrected<br><i>P</i> -value |
| <i>MAD1L1</i>  | 85                            | cg05985070 | 7   | 2050170          | -0.20 (0.04)                                     | 9.59E-06                       | 85                            | cg05095590 | 7   | 2139259          | 0.10 (0.01)                                        | 9.6E-10                        |
| <i>RPS6KA2</i> | 9                             | cg01577646 | 6   | 166911121        | -0.21 (0.04)                                     | 6.85E-07                       | 7                             | cg17501210 | 6   | 166970252        | -0.18 (0.02)                                       | 8.2E-19                        |
| <i>ZC3H3</i>   | 58                            | cg25900150 | 8   | 144601851        | -0.86 (0.19)                                     | 6.72E-06                       | 57                            | cg26361535 | 8   | 144576604        | 0.11 (0.02)                                        | 1.4E-10                        |

\*) original estimate and SE were scaled to a 1% change by dividing original estimate by 100 to ease comparison with the CHOP study.



**Supplementary Table S17: Best *P*-value rank of the associations of methylation variants within the *HIF3A* gene for all phenotypes in the pre-school children of the CHOP study.**

| Phenotype | EWAS<br>best Rank | CpG ID     | CHR | Position<br>(bp) | Change (SE) in BMI<br>per % change in DNAm | <i>P</i> -value | Bon-<br>ferroni | FDR      |
|-----------|-------------------|------------|-----|------------------|--------------------------------------------|-----------------|-----------------|----------|
| BMI       | 30246             | cg26749414 | 19  | 46807272         | -0.0402 (0.0192)                           | 3.73E-02        | 1               | 5.31E-01 |
| ZBMI      | 36221             | cg26749414 | 19  | 46807272         | -0.0232 (0.0117)                           | 4.89E-02        | 1               | 5.82E-01 |
| FM        | 22602             | cg26749414 | 19  | 46807272         | -0.0354 (0.0154)                           | 2.22E-02        | 1               | 4.23E-01 |
| FMI       | 17577             | cg26749414 | 19  | 46807272         | -0.0247 (0.0105)                           | 1.89E-02        | 1               | 4.63E-01 |
| FFM       | 85950             | cg02879662 | 19  | 46800467         | -0.2309 (0.1475)                           | 1.18E-01        | 1               | 5.94E-01 |
| FFMI      | 38504             | cg26749414 | 19  | 46807272         | -0.0205 (0.0105)                           | 5.11E-02        | 1               | 5.72E-01 |

**Supplementary Table S18: *P*-value ranks of the associations of all methylation variants within the *HIF3A* gene and BMI in the pre-school children of the CHOP study.**

| Phenotype | EWAS<br>Rank | CpG ID     | CHR | Position<br>(bp) | Change (SE) in BMI<br>per % change in DNAm | <i>P</i> -value | Bon-<br>ferroni | FDR      |
|-----------|--------------|------------|-----|------------------|--------------------------------------------|-----------------|-----------------|----------|
| BMI       | 165898       | cg07022477 | 19  | 46798869         | -0.0312 (0.0319)                           | 3.28E-01        | 1               | 8.54E-01 |
|           | 152178       | cg19045239 | 19  | 46799505         | -0.0170 (0.0162)                           | 2.96E-01        | 1               | 8.38E-01 |
|           | 269330       | cg15229275 | 19  | 46800054         | 0.0191 (0.0347)                            | 5.84E-01        | 1               | 9.35E-01 |
|           | 130965       | cg19310908 | 19  | 46800064         | -0.0717 (0.0617)                           | 2.46E-01        | 1               | 8.09E-01 |
|           | 185870       | cg14117138 | 19  | 46800085         | -0.0684 (0.0772)                           | 3.76E-01        | 1               | 8.73E-01 |
|           | 277155       | cg10594090 | 19  | 46800198         | 0.0533 (0.1025)                            | 6.04E-01        | 1               | 9.39E-01 |
|           | 407942       | cg14088357 | 19  | 46800338         | -0.0066 (0.0865)                           | 9.39E-01        | 1               | 9.93E-01 |
|           | 325716       | cg02879662 | 19  | 46800467         | -0.0456 (0.1307)                           | 7.28E-01        | 1               | 9.63E-01 |
|           | 364305       | cg09789590 | 19  | 46800479         | -0.0105 (0.0476)                           | 8.26E-01        | 1               | 9.78E-01 |
|           | 243853       | cg05286653 | 19  | 46800602         | -0.0125 (0.0195)                           | 5.20E-01        | 1               | 9.19E-01 |
|           | 194475       | cg27146050 | 19  | 46801557         | -0.0164 (0.0193)                           | 3.97E-01        | 1               | 8.81E-01 |
|           | 293493       | cg22891070 | 19  | 46801642         | -0.0068 (0.0148)                           | 6.45E-01        | 1               | 9.49E-01 |
|           | 227199       | cg16672562 | 19  | 46801672         | -0.0096 (0.0135)                           | 4.78E-01        | 1               | 9.08E-01 |
|           | 187227       | cg12068280 | 19  | 46804528         | 0.0188 (0.0213)                            | 3.80E-01        | 1               | 8.75E-01 |
|           | 416722       | cg21617218 | 19  | 46805820         | 0.0060 (0.1269)                            | 9.62E-01        | 1               | 9.96E-01 |
|           | 125092       | cg11253785 | 19  | 46806117         | 0.0842 (0.0704)                            | 2.32E-01        | 1               | 8.01E-01 |
|           | 300194       | cg01552731 | 19  | 46806907         | 0.0170 (0.0390)                            | 6.63E-01        | 1               | 9.52E-01 |
|           | 263326       | cg25196389 | 19  | 46806999         | -0.0163 (0.0286)                           | 5.69E-01        | 1               | 9.31E-01 |
|           | 83817        | cg23548163 | 19  | 46807119         | -0.0152 (0.0103)                           | 1.41E-01        | 1               | 7.25E-01 |
|           | <b>30246</b> | cg26749414 | 19  | 46807272         | -0.0402 (0.0192)                           | 3.73E-02        | 1               | 5.31E-01 |
|           | 79344        | cg20667364 | 19  | 46807466         | 0.0166 (0.0110)                            | 1.32E-01        | 1               | 7.15E-01 |
|           | 414754       | cg07684068 | 19  | 46807660         | 0.0022 (0.0415)                            | 9.57E-01        | 1               | 9.96E-01 |
|           | 74716        | cg25460031 | 19  | 46843271         | 0.0528 (0.0340)                            | 1.22E-01        | 1               | 7.03E-01 |
|           | 328141       | cg14153927 | 19  | 46846465         | 0.0103 (0.0303)                            | 7.34E-01        | 1               | 9.64E-01 |

**Supplementary Table S19: mQTL – SNPs of the ARIES study for the FDR significant EWAS associations in pre-school children of the CHOP study (BMI).**

| EWAS-BMI                      |            | CHOP |                  |                  |                                                        |          | mQTL (GCTA-database, Childhood) |            |                         |    |    | ARIES <sup>4</sup>                |             |                 |
|-------------------------------|------------|------|------------------|------------------|--------------------------------------------------------|----------|---------------------------------|------------|-------------------------|----|----|-----------------------------------|-------------|-----------------|
| Rank<br># of 212<br>FDR sign. | CpG ID     | CHR  | Gene             | Position<br>(bp) | Change<br>(SE)<br>in BMI<br>per %<br>change<br>in DNAm | P-value  | SNP                             | SNP<br>Chr | SNP<br>Position<br>(bp) | A1 | A2 | CpG -SNP<br>association<br>(beta) | P-<br>value | mQTL<br>Trans ? |
| 34                            | cg24332767 | 3    | <i>C3orf70</i>   | 184871524        | 0.15 (0.03)                                            | 2.83E-06 | rs34580288                      | 3          | 184874099               | G  | A  | -0.4015                           | 4.19E-10    | N               |
| 53                            | cg01936370 | 3    |                  | 156838174        | 0.09 (0.02)                                            | 4.41E-06 | rs56268334                      | 3          | 156848024               | T  | C  | -0.4273                           | 7.23E-19    | N               |
| 60                            | cg08692210 | 3    | <i>WDR51A</i>    | 52188851         | 0.18 (0.04)                                            | 5.11E-06 | rs9816434                       | 3          | 52197513                | T  | C  | 0.8139                            | 4.42E-54    | N               |
| 69                            | cg07664183 | 9    | <i>HAUS6</i>     | 19103231         | 0.16 (0.03)                                            | 5.79E-06 | rs7865126                       | 9          | 19102828                | C  | T  | -0.6415                           | 9.09E-21    | N               |
| 77                            | cg25371332 | 2    |                  | 10688317         | 0.18 (0.04)                                            | 6.23E-06 | rs12476576                      | 2          | 10684530                | C  | G  | 0.3808                            | 1.03E-20    | N               |
| 111                           | cg24067118 | 10   |                  | 102806933        | 0.08 (0.02)                                            | 1.11E-05 | rs807035                        | 10         | 102813193               | A  | G  | 0.5835                            | 1.91E-46    | N               |
| 138                           | cg19358373 | 12   |                  | 133414571        | 0.11 (0.02)                                            | 1.35E-05 | rs28495242                      | 12         | 133447804               | A  | G  | -0.5209                           | 5.88E-28    | N               |
| 148                           | cg19922435 | 4    | <i>LOC285419</i> | 124694178        | 0.06 (0.01)                                            | 1.44E-05 | rs7660169                       | 4          | 124655985               | T  | G  | -0.7716                           | 4.53E-49    | N               |
| 158                           | cg02518775 | 11   | <i>CNIH2</i>     | 66046770         | 0.13 (0.03)                                            | 1.57E-05 | rs201239459                     | 11         | 66016384                | D  | R  | -1.495                            | 4.56E-10    | N               |
| 171                           | cg20380470 | 10   |                  | 131987945        | 0.44 (0.10)                                            | 1.81E-05 | rs79976723                      | 10         | 131987377               | A  | G  | 0.6143                            | 2.07E-23    | N               |

Information on genetic variation using the ARIES GCTA-database can be found at <http://mqtl.db.org/>. Search was restricted to time-point childhood with the default definition of 1000000+ bp for the distance of a trans or cis definition of an mQTL site. For details see Gaunt et al.<sup>4</sup>

**Supplementary Table S20: mQTL – SNPs of the ARIES study for the FDR significant EWAS associations in pre-school children of the CHOP study (FM).**

| EWAS-FM                       |            | CHOP |                |                  |                                                  |          | mQTL (GCTA-database, Childhood) |            |                      |    |    | ARIES <sup>4</sup>                |          |                 |
|-------------------------------|------------|------|----------------|------------------|--------------------------------------------------|----------|---------------------------------|------------|----------------------|----|----|-----------------------------------|----------|-----------------|
| Rank<br># of 230<br>FDR sign. | CpG ID     | CHR  | Gene           | Position<br>(bp) | Change (SE)<br>in BMI<br>per % change<br>in DNAm | P-value  | SNP                             | SNP<br>Chr | SNP Position<br>(bp) | A1 | A2 | CpG -SNP<br>association<br>(beta) | P-value  | mQTL<br>Trans ? |
| 2                             | cg08692210 | 3    | <i>WDR51A</i>  | 52188851         | 0.17 (0.03)                                      | 5.89E-08 | rs9816434                       | 3          | 52197513             | T  | C  | 0.8139                            | 4.42E-54 | N               |
| 24                            | cg24332767 | 3    | <i>C3orf70</i> | 184871524        | 0.13 (0.03)                                      | 1.36E-06 | rs34580288                      | 3          | 184874099            | G  | A  | -0.4015                           | 4.19E-10 | N               |
| 34                            | cg22430790 | 14   | <i>FRMD6</i>   | 52117833         | 0.22 (0.05)                                      | 2.53E-06 | rs34354107                      | 14         | 52108652             | D  | R  | 0.3397                            | 5.83E-24 | N               |
| 66                            | cg22264170 | 6    |                | 9722973          | -0.11 (0.02)                                     | 5.34E-06 | rs138368004                     | 6          | 9749733              | D  | R  | -0.3858                           | 6.54E-24 | N               |
| 69                            | cg20380470 | 10   |                | 131987945        | 0.37 (0.08)                                      | 5.66E-06 | rs79976723                      | 10         | 131987377            | A  | G  | 0.6143                            | 2.07E-23 | N               |
| 77                            | cg07313882 | 17   | <i>TMC6</i>    | 76121348         | 0.11 (0.02)                                      | 6.87E-06 | rs34712518                      | 17         | 76121031             | T  | C  | 0.4427                            | 4.11E-10 | N               |
| 82                            | cg19358373 | 12   |                | 133414571        | 0.09 (0.02)                                      | 7.21E-06 | rs28495242                      | 12         | 133447804            | A  | G  | -0.5209                           | 5.88E-28 | N               |
| 91                            | cg07664183 | 9    | <i>HAUS6</i>   | 19103231         | 0.13 (0.03)                                      | 8.75E-06 | rs7865126                       | 9          | 19102828             | C  | T  | -0.6415                           | 9.09E-21 | N               |
| 205                           | cg24067118 | 10   |                | 102806933        | 0.06 (0.01)                                      | 2.29E-05 | rs807035                        | 10         | 102813193            | A  | G  | 0.5835                            | 1.91E-46 | N               |
| 206                           | cg25371332 | 2    |                | 10688317         | 0.14 (0.03)                                      | 2.31E-05 | rs12476576                      | 2          | 10684530             | C  | G  | 0.3808                            | 1.03E-20 | N               |
| 225                           | cg21309845 | 17   | <i>TMEM95</i>  | 7258498          | 0.14 (0.03)                                      | 2.55E-05 | rs72840988                      | 17         | 7258481              | T  | C  | 0.2619                            | 5.72E-12 | N               |
| 228                           | cg15923936 | 6    |                | 91318412         | 0.09 (0.02)                                      | 2.63E-05 | rs398026                        | 6          | 91318768             | G  | A  | -0.3854                           | 3.46E-22 | N               |

Information on genetic variation using the ARIES GCTA-database can be found at <http://mqtl.db.org/>. Search was restricted to time-point childhood with the default definition of 1000000+ bp for the distance of a trans or cis definition of an mQTL site. For details see Gaunt et al.<sup>4</sup>

**Supplementary Table S21: mQTL – SNPs of the ARIES study for the FDR significant EWAS associations in pre-school children of the CHOP study (FMI).**

| EWAS-FMI                     |            | CHOP |                    |                  |                                                  |          | mQTL (GCTA-database, childhood) |            |                      |    |    | ARIES <sup>4</sup>                |          |                 |
|------------------------------|------------|------|--------------------|------------------|--------------------------------------------------|----------|---------------------------------|------------|----------------------|----|----|-----------------------------------|----------|-----------------|
| Rank<br># of 24<br>FDR sign. | CpG ID     | CHR  | Gene               | Position<br>(bp) | Change (SE)<br>in BMI<br>per % change<br>in DNAm | P-value  | SNP                             | SNP<br>Chr | SNP Position<br>(bp) | A1 | A2 | CpG -SNP<br>association<br>(beta) | P-value  | mQTL<br>Trans ? |
| 9                            | cg08692210 | 3    | <i>WDR51A</i>      | 52188851         | 0.11 (0.02)                                      | 2.95E-07 | rs9816434                       | 3          | 52197513             | T  | C  | 0.8139                            | 4.42E-54 | N               |
| 21                           | cg22264170 | 6    | <i>MRDS1;OFCC1</i> | 9722973          | -0.07 (0.02)                                     | 2.39E-06 | rs138368004                     | 6          | 9749733              | D  | R  | -0.3858                           | 6.54E-24 | N               |

Information on genetic variation using the ARIES GCTA-database can be found at <http://mqtl.db.org/>. Search was restricted to time-point childhood with the default definition of 1000000+ bp for the distance of a trans or cis definition of an mQTL site. For details see Gaunt et al.<sup>4</sup>

**Supplementary Table S22: mQTL – SNPs of the ARIES study for the FDR significant EWAS associations in pre-school children of the CHOP study (FFM).**

| EWAS-<br>FFM                  |            | CHOP |                |                  |                                                     |          | mQTL (GCTA-database, childhood) |            |                      |    |    | ARIES <sup>4</sup>                |          |                 |
|-------------------------------|------------|------|----------------|------------------|-----------------------------------------------------|----------|---------------------------------|------------|----------------------|----|----|-----------------------------------|----------|-----------------|
| Rank<br># of 120<br>FDR sign. | CpG ID     | CHR  | Gene           | Position<br>(bp) | Change (SE)<br>in BMI<br>per %<br>change<br>in DNAm | P-value  | SNP                             | SNP<br>Chr | SNP Position<br>(bp) | A1 | A2 | CpG -SNP<br>association<br>(beta) | P-value  | mQTL<br>Trans ? |
| 3                             | cg24332767 | 3    | <i>C3orf70</i> | 184871524        | 0.20 (0.04)                                         | 3.70E-08 | rs34580288                      | 3          | 184874099            | G  | A  | -0.4015                           | 4.19E-10 | N               |
| 32                            | cg25901204 | 15   | <i>ISL2</i>    | 76628858         | 0.22 (0.05)                                         | 3.45E-06 | rs3866543                       | 15         | 76629609             | T  | G  | 0.2828                            | 1.09E-15 | N               |
| 34                            | cg25371332 | 2    |                | 10688317         | 0.21 (0.04)                                         | 3.59E-06 | rs12476576                      | 2          | 10684530             | C  | G  | 0.3808                            | 1.03E-20 | N               |
| 36                            | cg02532700 | 22   | <i>NCF4</i>    | 37257404         | 0.11 (0.02)                                         | 3.68E-06 | rs4821544                       | 22         | 37258503             | C  | T  | 0.5759                            | 1.27E-50 | N               |
| 49                            | cg20380470 | 10   |                | 131987945        | 0.52 (0.11)                                         | 5.32E-06 | rs79976723                      | 10         | 131987377            | A  | G  | 0.6143                            | 2.07E-23 | N               |
| 65                            | cg19903596 | 5    |                | 180527369        | 0.11 (0.02)                                         | 7.68E-06 | rs4355482                       | 5          | 180527367            | A  | G  | -0.6221                           | 1.92E-62 | N               |
| 82                            | cg02736908 | 17   |                | 29887376         | 0.10 (0.02)                                         | 9.40E-06 | rs1548470                       | 17         | 29862862             | A  | G  | 0.418                             | 7.78E-24 | N               |
| 99                            | cg06452513 | 17   | <i>UNC119</i>  | 26879897         | 0.16 (0.04)                                         | 1.12E-05 | rs652677                        | 17         | 26904517             | A  | C  | 0.4788                            | 5.32E-29 | N               |
| 100                           | cg00170487 | 4    | <i>FHDC1</i>   | 153871345        | 0.11 (0.03)                                         | 1.14E-05 | rs12510260                      | 4          | 153871340            | T  | C  | -0.4221                           | 6.67E-30 | N               |

Information on genetic variation using the ARIES GCTA-database can be found at <http://mqtl.db.org/>. Search was restricted to time-point childhood with the default definition of 1000000+ bp for the distance of a trans or cis definition of an mQTL site. For details see Gaunt et al.<sup>4</sup>

**Supplementary Table S23: Percent change in DNA-methylation by BMI unit (kg/m<sup>2</sup>) for the top 50 probes from the reference free EWAS model (K=9).**

| Rank | CpG ID     | CHR | Gene                | UCSC REFGENE GROUP                                             | RELATION<br>TO UCSC<br>CPG<br>ISLAND | Position<br>(bp) | % DNAm<br>Change (SE)<br>per BMI<br>unit | P-value  | Bon-<br>ferroni | FDR      |
|------|------------|-----|---------------------|----------------------------------------------------------------|--------------------------------------|------------------|------------------------------------------|----------|-----------------|----------|
| 1    | cg13850887 | 2   | <i>SNEDI</i>        | Body                                                           | S_Shore                              | 241993303        | -0.43 (0.07)                             | 3.17E-10 | 1.37E-04        | 1.37E-04 |
| 2    | cg04010122 | 2   | <i>SOS1</i>         | Body                                                           | N_Shore                              | 39346883         | 0.38 (0.06)                              | 3.13E-09 | 1.35E-03        | 6.76E-04 |
| 3    | cg08692210 | 3   | <i>WDR51A</i>       | TSS200;TSS200;TSS200                                           | Island                               | 52188851         | 0.36 (0.06)                              | 1.10E-08 | 4.75E-03        | 1.58E-03 |
| 4    | cg26627956 | 2   | <i>CFLAR</i>        | Body;Body;Body                                                 |                                      | 202004766        | -0.34 (0.06)                             | 3.13E-08 | 1.35E-02        | 3.38E-03 |
| 5    | cg06594770 | 22  | <i>TRIOBP</i>       | TSS200                                                         |                                      | 38092974         | 0.16 (0.03)                              | 1.32E-07 | 5.69E-02        | 1.14E-02 |
| 6    | cg02038492 | 16  | <i>CASKIN1</i>      | Body                                                           | N_Shore                              | 2235025          | 0.36 (0.07)                              | 2.69E-07 | 1.16E-01        | 1.82E-02 |
| 7    | cg04219544 | 17  | <i>KRT24</i>        | TSS200                                                         |                                      | 38860042         | -0.49 (0.09)                             | 2.95E-07 | 1.27E-01        | 1.82E-02 |
| 8    | cg08541599 | 19  | <i>BSG</i>          | Body;Body;Body                                                 | Island                               | 579501           | -0.43 (0.08)                             | 3.64E-07 | 1.57E-01        | 1.95E-02 |
| 9    | cg17203352 | 17  | <i>WFIKKN2</i>      | TSS200                                                         |                                      | 48912487         | -0.44 (0.09)                             | 4.06E-07 | 1.75E-01        | 1.95E-02 |
| 10   | cg02518775 | 11  | <i>CNIH2</i>        | Body                                                           | S_Shore                              | 66046770         | 0.41 (0.08)                              | 1.09E-06 | 4.70E-01        | 4.51E-02 |
| 11   | cg15026574 | 3   | <i>ST6GAL1</i>      | 5'UTR;5'UTR                                                    |                                      | 186683429        | -0.38 (0.08)                             | 1.18E-06 | 5.10E-01        | 4.51E-02 |
| 12   | cg26401512 | 1   | <i>ZNF643</i>       | Body                                                           |                                      | 40922773         | -0.42 (0.09)                             | 1.36E-06 | 5.86E-01        | 4.51E-02 |
| 13   | cg22264170 | 6   |                     |                                                                |                                      | 9722973          | -0.44 (0.09)                             | 1.36E-06 | 5.87E-01        | 4.51E-02 |
| 14   | cg02682525 | 11  | <i>ANKK1</i>        | TSS1500                                                        | N_Shore                              | 113258277        | 0.42 (0.09)                              | 1.62E-06 | 6.99E-01        | 4.99E-02 |
| 15   | cg12379720 | 22  | <i>TRIOBP</i>       | TSS200                                                         |                                      | 38092989         | 0.26 (0.05)                              | 1.97E-06 | 8.52E-01        | 5.68E-02 |
| 16   | cg19358373 | 12  |                     |                                                                | S_Shore                              | 133414571        | 0.54 (0.11)                              | 2.14E-06 | 9.24E-01        | 5.78E-02 |
| 17   | cg14834653 | 10  | <i>FGFR2</i>        | TSS200;5'UTR;5'UTR;TSS1500;5'UTR;<br>TSS1500;5'UTR;5'UTR;5'UTR | N_Shelf                              | 123353791        | -0.29 (0.06)                             | 2.50E-06 | 1               | 6.34E-02 |
| 18   | cg26867987 | 6   | <i>COL11A2</i>      | 3'UTR;3'UTR;3'UTR                                              | S_Shore                              | 33131450         | -0.44 (0.09)                             | 2.87E-06 | 1               | 6.67E-02 |
| 19   | cg16810626 | 8   | <i>GATA4</i>        | Body                                                           |                                      | 11594003         | 0.89 (0.19)                              | 2.99E-06 | 1               | 6.67E-02 |
| 20   | cg07764575 | 19  | <i>CATSPERG</i>     | Body                                                           | N_Shore                              | 38850992         | -0.56 (0.12)                             | 3.15E-06 | 1               | 6.67E-02 |
| 21   | cg19922435 | 4   | <i>LOC285419</i>    | Body;TSS1500                                                   |                                      | 124694178        | 0.84 (0.18)                              | 3.25E-06 | 1               | 6.67E-02 |
| 22   | cg09245901 | 6   |                     |                                                                |                                      | 132075947        | 0.66 (0.14)                              | 3.61E-06 | 1               | 7.07E-02 |
| 23   | cg26882525 | 5   | <i>SLC36A3</i>      | Body;Body                                                      |                                      | 150677867        | -3.10 (0.67)                             | 4.82E-06 | 1               | 8.71E-02 |
| 24   | cg05911774 | X   | <i>SRPX2</i>        | 1stExon;5'UTR                                                  |                                      | 99899345         | 0.32 (0.07)                              | 4.85E-06 | 1               | 8.71E-02 |
| 25   | cg05120716 | 16  | <i>PRKCB</i>        | Body;Body                                                      |                                      | 23881993         | -0.45 (0.10)                             | 5.78E-06 | 1               | 9.98E-02 |
| 26   | cg12610207 | 12  | <i>TBX5</i>         | Body;Body;Body;Body                                            | Island                               | 114833950        | 0.08 (0.02)                              | 6.43E-06 | 1               | 1.07E-01 |
| 27   | cg01184539 | 6   | <i>FAM26D;BET3L</i> | TSS1500;Body                                                   |                                      | 116848950        | 0.31 (0.07)                              | 7.08E-06 | 1               | 1.11E-01 |

|    |            |    |                     |                                              |         |           |              |          |   |          |
|----|------------|----|---------------------|----------------------------------------------|---------|-----------|--------------|----------|---|----------|
| 28 | cg01166564 | 2  | <i>C2orf18</i>      | Body                                         | Island  | 26987492  | 0.12 (0.03)  | 7.21E-06 | 1 | 1.11E-01 |
| 29 | cg14124917 | 2  | <i>GRHL1</i>        | TSS1500                                      | Island  | 10090974  | 0.20 (0.04)  | 8.99E-06 | 1 | 1.31E-01 |
| 30 | cg01941047 | 5  | <i>SFRS12</i>       | 5'UTR;Body;1stExon                           | Island  | 65440763  | -0.06 (0.01) | 9.10E-06 | 1 | 1.31E-01 |
| 31 | cg20122727 | 4  | <i>BTC</i>          | TSS200                                       | S_Shore | 75719957  | 0.46 (0.10)  | 1.08E-05 | 1 | 1.46E-01 |
| 32 | cg23611697 | 2  |                     |                                              |         | 102666444 | -0.36 (0.08) | 1.09E-05 | 1 | 1.46E-01 |
| 33 | cg20655548 | 11 | <i>TRIM29</i>       | 1stExon                                      | N_Shore | 120008025 | -0.24 (0.05) | 1.12E-05 | 1 | 1.46E-01 |
| 34 | cg24067118 | 10 |                     |                                              | N_Shore | 102806933 | 0.60 (0.13)  | 1.24E-05 | 1 | 1.53E-01 |
| 35 | cg01178624 | 11 | <i>KCNK7</i>        | 3'UTR;3'UTR;3'UTR;3'UTR                      | Island  | 65360327  | 1.17 (0.26)  | 1.27E-05 | 1 | 1.53E-01 |
| 36 | cg22798261 | 19 | <i>THEG;THEG</i>    | TSS1500;TSS1500                              | S_Shore | 376653    | -1.27 (0.29) | 1.27E-05 | 1 | 1.53E-01 |
| 37 | cg17810765 | 2  | <i>ANO7</i>         | TSS200;TSS200                                |         | 242127836 | 0.39 (0.09)  | 1.37E-05 | 1 | 1.60E-01 |
| 38 | cg05715492 | 7  | <i>ARPC1B</i>       | Body                                         | S_Shore | 98991138  | 0.91 (0.21)  | 1.45E-05 | 1 | 1.64E-01 |
| 39 | cg01127586 | X  | <i>LOC92249</i>     | TSS200                                       |         | 62780937  | -0.50 (0.11) | 1.48E-05 | 1 | 1.64E-01 |
| 40 | cg01127608 | 9  | <i>LMX1B</i>        | Body                                         | Island  | 129377854 | 3.51 (0.80)  | 1.54E-05 | 1 | 1.67E-01 |
| 41 | cg14783904 | 17 | <i>GLP2R</i>        | 1stExon                                      |         | 9729422   | 0.56 (0.13)  | 1.85E-05 | 1 | 1.91E-01 |
| 42 | cg00250743 | 10 | <i>FGFR2</i>        | Body;Body;Body;Body;Body;Body;Body;Body;Body |         | 123264130 | -0.40 (0.09) | 1.86E-05 | 1 | 1.91E-01 |
| 43 | cg14398659 | 11 | <i>INTS4</i>        | TSS200                                       | Island  | 77705832  | -0.07 (0.02) | 1.96E-05 | 1 | 1.96E-01 |
| 44 | cg20776385 | 15 |                     |                                              | N_Shore | 40613333  | 0.25 (0.06)  | 2.21E-05 | 1 | 2.17E-01 |
| 45 | cg10119082 | 7  | <i>ARPC1B</i>       | Body                                         | Island  | 98990626  | 0.49 (0.11)  | 2.43E-05 | 1 | 2.33E-01 |
| 46 | cg06376715 | 1  | <i>TP73</i>         | Body;Body;Body;Body                          | Island  | 3634918   | 0.50 (0.12)  | 2.71E-05 | 1 | 2.47E-01 |
| 47 | cg10277500 | 15 | <i>LYSMD2;TMOD2</i> | 1stExon;TSS1500;TSS1500;5'UTR                | Island  | 52043553  | 0.08 (0.02)  | 2.74E-05 | 1 | 2.47E-01 |
| 48 | cg06644488 | 22 | <i>TRIOBP</i>       | TSS200                                       |         | 38092896  | 0.18 (0.04)  | 2.76E-05 | 1 | 2.47E-01 |
| 49 | cg11072119 | 1  | <i>RAP1GAP</i>      | Body;Body;Body                               | S_Shelf | 21934312  | 0.31 (0.07)  | 2.80E-05 | 1 | 2.47E-01 |
| 50 | cg14289863 | 9  | <i>SMC5</i>         | TSS1500                                      | N_Shore | 72872391  | -0.30 (0.07) | 3.19E-05 | 1 | 2.75E-01 |

Genes in brackets indicate manual annotation for closest genes using the UCSC genome browser on human GRCh37/hg19 assembly. The record highlighted in red indicates the last methylation site significantly associated with the outcome according to Bonferroni correction and the blue highlighted record the last significant according to false-discovery rate.<sup>5</sup> The estimates and *P*-values are based on the reference free EWAS model of Houseman<sup>6,7</sup> with DNAm as outcome and phenotype, all covariates inclusive 30 control probe PCs and K=9 latent dimensions instead of 6 cell mix adjustment as independent variables. Inflation due to genomic control<sup>8</sup> is 0.761 and is 0.197 according to van Iterson's "bacon-method".<sup>9</sup>

**Supplementary Table S24: Percent change in DNA-methylation by ZBMI unit (z-score) for the top 50 probes from the reference free EWAS model (K=9).**

| Rank | CpG ID     | CHR | Gene            | UCSC REFGENE GROUP                                             | RELATION<br>TO UCSC<br>CPG<br>ISLAND | Position<br>(bp) | % DNAm<br>Change (SE)<br>per ZBMI<br>unit | P-value  | Bon-<br>ferroni | FDR      |
|------|------------|-----|-----------------|----------------------------------------------------------------|--------------------------------------|------------------|-------------------------------------------|----------|-----------------|----------|
| 1    | cg04010122 | 2   | <i>SOS1</i>     | Body                                                           | N_Shore                              | 39346883         | 0.57 (0.09)                               | 6.58E-10 | 2.84E-04        | 2.84E-04 |
| 2    | cg13850887 | 2   | <i>SNED1</i>    | Body                                                           | S_Shore                              | 241993303        | -0.67 (0.11)                              | 3.03E-09 | 1.31E-03        | 6.20E-04 |
| 3    | cg08692210 | 3   | <i>WDR51A</i>   | TSS200;TSS200;TSS200                                           | Island                               | 52188851         | 0.52 (0.09)                               | 4.31E-09 | 1.86E-03        | 6.20E-04 |
| 4    | cg26867987 | 6   | <i>COL11A2</i>  | 3'UTR;3'UTR;3'UTR                                              | S_Shore                              | 33131450         | -0.65 (0.11)                              | 1.95E-08 | 8.40E-03        | 2.10E-03 |
| 5    | cg09245901 | 6   |                 |                                                                |                                      | 132075947        | 1.08 (0.19)                               | 4.11E-08 | 1.77E-02        | 3.50E-03 |
| 6    | cg06594770 | 22  | <i>TRIOBP</i>   | TSS200                                                         |                                      | 38092974         | 0.23 (0.04)                               | 5.54E-08 | 2.39E-02        | 3.50E-03 |
| 7    | cg26627956 | 2   | <i>CFLAR</i>    | Body;Body;Body                                                 |                                      | 202004766        | -0.52 (0.09)                              | 5.69E-08 | 2.45E-02        | 3.50E-03 |
| 8    | cg18287222 | 6   | <i>MAP3K5</i>   | Body                                                           |                                      | 137059970        | 0.51 (0.10)                               | 1.76E-07 | 7.59E-02        | 9.49E-03 |
| 9    | cg26401512 | 1   | <i>ZNF643</i>   | Body                                                           |                                      | 40922773         | -0.62 (0.12)                              | 2.68E-07 | 1.15E-01        | 1.28E-02 |
| 10   | cg20301680 | 1   | <i>SSBP3</i>    | Body;Body;Body                                                 |                                      | 54786494         | 0.45 (0.09)                               | 4.36E-07 | 1.88E-01        | 1.88E-02 |
| 11   | cg04219544 | 17  | <i>KRT24</i>    | TSS200                                                         |                                      | 38860042         | -0.80 (0.16)                              | 8.50E-07 | 3.66E-01        | 3.03E-02 |
| 12   | cg07764575 | 19  | <i>CATSPERG</i> | Body                                                           | N_Shore                              | 38850992         | -0.84 (0.17)                              | 9.40E-07 | 4.06E-01        | 3.03E-02 |
| 13   | cg01166564 | 2   | <i>C2orf18</i>  | Body                                                           | Island                               | 26987492         | 0.19 (0.04)                               | 9.75E-07 | 4.21E-01        | 3.03E-02 |
| 14   | cg14289863 | 9   | <i>SMC5</i>     | TSS1500                                                        | N_Shore                              | 72872391         | -0.47 (0.09)                              | 9.84E-07 | 4.25E-01        | 3.03E-02 |
| 15   | cg17203352 | 17  | <i>WFIKK2</i>   | TSS200                                                         |                                      | 48912487         | -0.66 (0.13)                              | 1.09E-06 | 4.69E-01        | 3.13E-02 |
| 16   | cg15026574 | 3   | <i>ST6GAL1</i>  | 5'UTR;5'UTR                                                    |                                      | 186683429        | -0.57 (0.12)                              | 1.35E-06 | 5.84E-01        | 3.65E-02 |
| 17   | cg19358373 | 12  |                 |                                                                | S_Shore                              | 133414571        | 0.86 (0.18)                               | 1.70E-06 | 7.34E-01        | 4.32E-02 |
| 18   | cg12379720 | 22  | <i>TRIOBP</i>   | TSS200                                                         |                                      | 38092989         | 0.40 (0.08)                               | 2.69E-06 | 1               | 6.44E-02 |
| 19   | cg22798261 | 19  | <i>THEG</i>     | TSS1500;TSS1500                                                | S_Shore                              | 376653           | -1.86 (0.40)                              | 3.90E-06 | 1               | 8.86E-02 |
| 20   | cg00955911 | 14  | <i>FOXA1</i>    | Body                                                           | Island                               | 38061988         | 0.38 (0.08)                               | 4.75E-06 | 1               | 1.03E-01 |
| 21   | cg24102266 | 1   | <i>KIAA1522</i> | Body                                                           | Island                               | 33219584         | -0.09 (0.02)                              | 5.84E-06 | 1               | 1.19E-01 |
| 22   | cg10962535 | 19  | <i>ITGB1BP3</i> | 5'UTR                                                          | Island                               | 3933474          | 0.32 (0.07)                               | 6.05E-06 | 1               | 1.19E-01 |
| 23   | cg20058148 | 4   | <i>MAP9</i>     | TSS1500                                                        | S_Shore                              | 156298427        | -0.96 (0.21)                              | 7.47E-06 | 1               | 1.40E-01 |
| 24   | cg22264170 | 6   |                 |                                                                |                                      | 9722973          | -0.64 (0.14)                              | 8.00E-06 | 1               | 1.44E-01 |
| 25   | cg14834653 | 10  | <i>FGFR2</i>    | TSS200;5'UTR;5'UTR;TSS1500;5'UTR;<br>TSS1500;5'UTR;5'UTR;5'UTR | N_Shelf                              | 123353791        | -0.46 (0.10)                              | 9.83E-06 | 1               | 1.59E-01 |
| 26   | cg24067118 | 10  |                 |                                                                | N_Shore                              | 102806933        | 1.02 (0.23)                               | 9.93E-06 | 1               | 1.59E-01 |

|    |            |    |                  |                                                  |         |           |              |          |   |          |
|----|------------|----|------------------|--------------------------------------------------|---------|-----------|--------------|----------|---|----------|
| 27 | cg20860188 | 2  | <i>KLHL29</i>    | 5'UTR                                            | S_Shelf | 23613280  | -1.14 (0.25) | 9.97E-06 | 1 | 1.59E-01 |
| 28 | cg14621090 | 13 |                  |                                                  |         | 113571679 | -0.55 (0.12) | 1.06E-05 | 1 | 1.64E-01 |
| 29 | cg14398659 | 11 | <i>INTS4</i>     | TSS200                                           | Island  | 77705832  | -0.11 (0.02) | 1.13E-05 | 1 | 1.68E-01 |
| 30 | cg19922435 | 4  | <i>LOC285419</i> | Body;TSS1500                                     |         | 124694178 | 1.37 (0.31)  | 1.23E-05 | 1 | 1.76E-01 |
| 31 | cg26882525 | 5  | <i>SLC36A3</i>   | Body;Body                                        |         | 150677867 | -5.15 (1.17) | 1.34E-05 | 1 | 1.86E-01 |
| 32 | cg17378617 | 11 | <i>NXF1</i>      | Body;Body                                        | N_Shore | 62572592  | 0.30 (0.07)  | 1.60E-05 | 1 | 2.15E-01 |
| 33 | cg05120716 | 16 | <i>PRKCB</i>     | Body;Body                                        |         | 23881993  | -0.67 (0.15) | 1.69E-05 | 1 | 2.15E-01 |
| 34 | cg10788371 | 11 | <i>LRRC32</i>    | 5'UTR;1stExon;5'UTR                              | N_Shore | 76381040  | 0.63 (0.14)  | 1.73E-05 | 1 | 2.15E-01 |
| 35 | cg02682525 | 11 | <i>ANKK1</i>     | TSS1500                                          | N_Shore | 113258277 | 0.66 (0.15)  | 1.74E-05 | 1 | 2.15E-01 |
| 36 | cg05715492 | 7  | <i>ARPC1B</i>    | Body                                             | S_Shore | 98991138  | 1.40 (0.32)  | 1.83E-05 | 1 | 2.19E-01 |
| 37 | cg17082365 | X  | <i>ARHGAP6</i>   | Body;Body                                        | Island  | 11157323  | -1.94 (0.45) | 1.88E-05 | 1 | 2.19E-01 |
| 38 | cg03214277 | 19 | <i>SLC25A23</i>  | TSS1500                                          | Island  | 6460154   | -0.13 (0.03) | 2.01E-05 | 1 | 2.28E-01 |
| 39 | cg23300732 | 4  | <i>STK32B</i>    | TSS200                                           | Island  | 5053496   | -0.14 (0.03) | 2.10E-05 | 1 | 2.31E-01 |
| 40 | cg24314057 | 1  | <i>RGS2</i>      | TSS200                                           | Island  | 192778043 | 0.08 (0.02)  | 2.16E-05 | 1 | 2.31E-01 |
| 41 | cg12610207 | 12 | <i>TBX5</i>      | Body;Body;Body;Body                              | Island  | 114833950 | 0.13 (0.03)  | 2.23E-05 | 1 | 2.31E-01 |
| 42 | cg01976623 | 14 | <i>PRIMA1</i>    | TSS1500                                          | S_Shore | 94255901  | 0.80 (0.19)  | 2.25E-05 | 1 | 2.31E-01 |
| 43 | cg00250743 | 10 | <i>FGFR2</i>     | Body;Body;Body;Body;Body;<br>Body;Body;Body;Body |         | 123264130 | -0.60 (0.14) | 2.31E-05 | 1 | 2.32E-01 |
| 44 | cg23470262 | 12 | <i>GOLGA3</i>    | Body                                             |         | 133383213 | 0.42 (0.10)  | 2.48E-05 | 1 | 2.43E-01 |
| 45 | cg11701951 | 12 | <i>CSRNP2</i>    | 5'UTR;1stExon                                    | Island  | 51477122  | -0.10 (0.02) | 2.86E-05 | 1 | 2.73E-01 |
| 46 | cg24093300 | 7  | <i>PTPRN2</i>    | Body;Body;Body                                   |         | 157543805 | -0.47 (0.11) | 2.91E-05 | 1 | 2.73E-01 |
| 47 | cg16392111 | 1  |                  |                                                  |         | 55218005  | 0.34 (0.08)  | 3.03E-05 | 1 | 2.78E-01 |
| 48 | cg02518775 | 11 | <i>CNIH2</i>     | Body                                             | S_Shore | 66046770  | 0.65 (0.15)  | 3.09E-05 | 1 | 2.78E-01 |
| 49 | cg21594646 | 15 | <i>PIGB</i>      | 5'UTR;1stExon                                    | Island  | 55611305  | -0.17 (0.04) | 3.38E-05 | 1 | 2.94E-01 |
| 50 | cg16072030 | 1  | <i>PPP1R15B</i>  | TSS1500                                          | Island  | 204381148 | -0.10 (0.02) | 3.41E-05 | 1 | 2.94E-01 |

Genes in brackets indicate manual annotation for closest genes using the UCSC genome browser on human GRCh37/hg19 assembly. The record highlighted in red indicates the last methylation site significantly associated with the outcome according to Bonferroni correction and the blue highlighted record the last significant according to false-discovery rate.<sup>5</sup> The estimates and *P*-values are based on the reference free EWAS model of Houseman<sup>6,7</sup> with DNAm as outcome and phenotype, all covariates inclusive 30 control probe PCs and K=9 latent dimensions instead of 6 cell mix adjustment as independent variables. Inflation due to genomic control<sup>8</sup> is 0.756 and is 0.197 according to van Iterson's "bacon-method".<sup>9</sup>



**Supplementary Table S25: Percent change in DNA-methylation by FM unit (kg) for the top 50 probes from the reference free EWAS model (K=9).**

| Rank | CpG ID     | CHR | Gene                | UCSC REFGENE GROUP              | RELATION<br>TO UCSC<br>CPG ISLAND | Position<br>(bp) | % DNAm<br>Change (SE)<br>per FM unit | P-value  | Bon-<br>ferroni | FDR      |
|------|------------|-----|---------------------|---------------------------------|-----------------------------------|------------------|--------------------------------------|----------|-----------------|----------|
| 1    | cg13850887 | 2   | <i>SNED1</i>        | Body                            | S_Shore                           | 241993303        | -0.61 (0.09)                         | 1.25E-11 | 5.37E-06        | 5.37E-06 |
| 2    | cg08692210 | 3   | <i>WDR51A</i>       | TSS200;TSS200;TSS200            | Island                            | 52188851         | 0.51 (0.08)                          | 1.26E-10 | 5.45E-05        | 2.73E-05 |
| 3    | cg04010122 | 2   | <i>SOS1</i>         | Body                            | N_Shore                           | 39346883         | 0.55 (0.09)                          | 3.64E-09 | 1.57E-03        | 4.87E-04 |
| 4    | cg26627956 | 2   | <i>CFLAR</i>        | Body;Body;Body                  |                                   | 202004766        | -0.49 (0.08)                         | 4.51E-09 | 1.95E-03        | 4.87E-04 |
| 5    | cg05120716 | 16  | <i>PRKCB</i>        | Body;Body                       |                                   | 23881993         | -0.63 (0.11)                         | 7.20E-09 | 3.10E-03        | 6.21E-04 |
| 6    | cg26867987 | 6   | <i>COL11A2</i>      | 3'UTR;3'UTR;3'UTR               | S_Shore                           | 33131450         | -0.54 (0.09)                         | 3.25E-08 | 1.40E-02        | 2.34E-03 |
| 7    | cg17203352 | 17  | <i>WFIKKN2</i>      | TSS200                          |                                   | 48912487         | -0.59 (0.11)                         | 5.44E-08 | 2.35E-02        | 2.81E-03 |
| 8    | cg22264170 | 6   |                     |                                 |                                   | 9722973          | -0.67 (0.12)                         | 5.53E-08 | 2.39E-02        | 2.81E-03 |
| 9    | cg22798261 | 19  | <i>THEG</i>         | TSS1500;TSS1500                 | S_Shore                           | 376653           | -1.47 (0.27)                         | 6.38E-08 | 2.75E-02        | 2.81E-03 |
| 10   | cg08541599 | 19  | <i>BSG</i>          | Body;Body;Body                  | Island                            | 579501           | -0.66 (0.12)                         | 6.78E-08 | 2.92E-02        | 2.81E-03 |
| 11   | cg01166564 | 2   | <i>C2orf18</i>      | Body                            | Island                            | 26987492         | 0.17 (0.03)                          | 7.16E-08 | 3.09E-02        | 2.81E-03 |
| 12   | cg15026574 | 3   | <i>ST6GAL1</i>      | 5'UTR;5'UTR                     |                                   | 186683429        | -0.49 (0.09)                         | 8.31E-08 | 3.58E-02        | 2.99E-03 |
| 13   | cg06594770 | 22  | <i>TRIOBP</i>       | TSS200                          |                                   | 38092974         | 0.21 (0.04)                          | 1.02E-07 | 4.39E-02        | 3.38E-03 |
| 14   | cg02317742 | 2   | <i>ATOH8</i>        | 1stExon;5'UTR                   | Island                            | 85981021         | 0.12 (0.02)                          | 1.58E-07 | 6.83E-02        | 4.88E-03 |
| 15   | cg12379720 | 22  | <i>TRIOBP</i>       | TSS200                          |                                   | 38092989         | 0.34 (0.06)                          | 2.22E-07 | 9.59E-02        | 6.40E-03 |
| 16   | cg12403162 | 10  | <i>ABLIM1</i>       | Body;Body;Body                  | S_Shelf                           | 116394557        | -0.58 (0.11)                         | 3.01E-07 | 1.30E-01        | 8.12E-03 |
| 17   | cg23611697 | 2   |                     |                                 |                                   | 102666444        | -0.58 (0.11)                         | 5.53E-07 | 2.39E-01        | 1.40E-02 |
| 18   | cg07894717 | 1   | <i>APITD1;CORT</i>  | Body;TSS1500                    |                                   | 10508598         | -0.52 (0.10)                         | 5.98E-07 | 2.58E-01        | 1.43E-02 |
| 19   | cg26401512 | 1   | <i>ZNF643</i>       | Body                            |                                   | 40922773         | -0.49 (0.10)                         | 8.63E-07 | 3.72E-01        | 1.96E-02 |
| 20   | cg01184539 | 6   | <i>FAM26D;BET3L</i> | TSS1500;Body                    |                                   | 116848950        | 0.48 (0.10)                          | 1.26E-06 | 5.42E-01        | 2.71E-02 |
| 21   | cg14621090 | 13  |                     |                                 |                                   | 113571679        | -0.53 (0.11)                         | 2.41E-06 | 1               | 4.74E-02 |
| 22   | cg08936794 | 1   | <i>ELOVL1</i>       | TSS200                          | Island                            | 43833873         | 0.17 (0.04)                          | 2.42E-06 | 1               | 4.74E-02 |
| 23   | cg19358373 | 12  |                     |                                 | S_Shore                           | 133414571        | 0.70 (0.15)                          | 3.03E-06 | 1               | 5.68E-02 |
| 24   | cg02853524 | 3   |                     |                                 |                                   | 145768808        | -0.66 (0.14)                         | 3.60E-06 | 1               | 6.48E-02 |
| 25   | cg06644488 | 22  | <i>TRIOBP</i>       | TSS200                          |                                   | 38092896         | 0.23 (0.05)                          | 3.75E-06 | 1               | 6.48E-02 |
| 26   | cg24999308 | 15  | <i>NPTN</i>         | 1stExon;1stExon;1stExon;1stExon | Island                            | 73925545         | 0.12 (0.02)                          | 4.83E-06 | 1               | 8.01E-02 |
| 27   | cg09357438 | 4   | <i>SPINK2</i>       | TSS1500                         | S_Shore                           | 57688282         | -0.31 (0.07)                         | 5.89E-06 | 1               | 9.41E-02 |

|    |            |    |                       |                                                       |         |           |              |          |   |          |
|----|------------|----|-----------------------|-------------------------------------------------------|---------|-----------|--------------|----------|---|----------|
| 28 | cg22062432 | 5  |                       |                                                       | S_Shore | 180634502 | 0.31 (0.07)  | 6.36E-06 | 1 | 9.80E-02 |
| 29 | cg07652350 | 11 | <i>IRF7</i>           | TSS1500;TSS200;TSS200                                 | Island  | 616009    | -0.10 (0.02) | 8.48E-06 | 1 | 1.25E-01 |
| 30 | cg14124917 | 2  | <i>GRHL1</i>          | TSS1500                                               | Island  | 10090974  | 0.25 (0.05)  | 8.68E-06 | 1 | 1.25E-01 |
| 31 | cg24102266 | 1  | <i>KIAA1522</i>       | Body                                                  | Island  | 33219584  | -0.06 (0.01) | 9.44E-06 | 1 | 1.25E-01 |
| 32 | cg05063339 | 4  |                       |                                                       | Island  | 54957980  | -0.09 (0.02) | 9.53E-06 | 1 | 1.25E-01 |
| 33 | cg27038634 | 8  |                       |                                                       | N_Shore | 49468341  | 0.65 (0.15)  | 9.80E-06 | 1 | 1.25E-01 |
| 34 | cg14397361 | 9  | <i>COBRA1</i>         | 1stExon                                               | Island  | 140149997 | 0.11 (0.02)  | 9.85E-06 | 1 | 1.25E-01 |
| 35 | cg01127586 | X  | <i>LOC92249</i>       | TSS200                                                |         | 62780937  | -0.59 (0.13) | 1.08E-05 | 1 | 1.31E-01 |
| 36 | cg10483909 | 1  | <i>CEP170;SDCCAG8</i> | 5'UTR;1stExon;1stExon;<br>TSS1500;1stExon;5'UTR;5'UTR | Island  | 243418637 | 0.17 (0.04)  | 1.10E-05 | 1 | 1.31E-01 |
| 37 | cg06917785 | 19 | <i>KANK3</i>          | TSS200                                                | Island  | 8408327   | 0.19 (0.04)  | 1.14E-05 | 1 | 1.31E-01 |
| 38 | cg14268632 | 22 | <i>TRIOBP</i>         | TSS200                                                |         | 38092830  | 0.23 (0.05)  | 1.17E-05 | 1 | 1.31E-01 |
| 39 | cg20856330 | 6  | <i>RPP21</i>          | Body                                                  | S_Shore | 30313546  | -0.63 (0.14) | 1.18E-05 | 1 | 1.31E-01 |
| 40 | cg09590733 | 4  | <i>DSPP</i>           | 5'UTR                                                 |         | 88530371  | 0.37 (0.08)  | 1.50E-05 | 1 | 1.55E-01 |
| 41 | cg19360425 | 19 | <i>PTPRS</i>          | Body;Body;Body;Body                                   | S_Shore | 5213208   | -0.44 (0.10) | 1.52E-05 | 1 | 1.55E-01 |
| 42 | cg04310104 | 6  | <i>TFAP2B</i>         | TSS1500                                               | N_Shore | 50785757  | -0.35 (0.08) | 1.54E-05 | 1 | 1.55E-01 |
| 43 | cg09121478 | 1  | <i>SLC2A7</i>         | TSS200                                                |         | 9086460   | -0.51 (0.12) | 1.57E-05 | 1 | 1.55E-01 |
| 44 | cg26872151 | 10 | <i>PIP4K2A</i>        | Body                                                  |         | 22908265  | -0.74 (0.17) | 1.62E-05 | 1 | 1.55E-01 |
| 45 | cg07327568 | 4  | <i>CLOCK</i>          | 5'UTR                                                 |         | 56393876  | 0.39 (0.09)  | 1.67E-05 | 1 | 1.55E-01 |
| 46 | cg13870041 | 1  |                       |                                                       |         | 227015885 | 0.24 (0.05)  | 1.68E-05 | 1 | 1.55E-01 |
| 47 | cg20093577 | 11 | <i>SF3B2</i>          | TSS200                                                | Island  | 65819742  | 0.08 (0.02)  | 1.75E-05 | 1 | 1.55E-01 |
| 48 | cg07764575 | 19 | <i>CATSPERG</i>       | Body                                                  | N_Shore | 38850992  | -0.70 (0.16) | 1.82E-05 | 1 | 1.55E-01 |
| 49 | cg11350053 | 6  | <i>IER3;FLOT1</i>     | 3'UTR;TSS1500                                         | Island  | 30711028  | 0.32 (0.07)  | 1.85E-05 | 1 | 1.55E-01 |
| 50 | cg24093300 | 7  | <i>PTPRN2</i>         | Body;Body;Body                                        |         | 157543805 | -0.42 (0.10) | 1.85E-05 | 1 | 1.55E-01 |

Genes in brackets indicate manual annotation for closest genes using the UCSC genome browser on human GRCh37/hg19 assembly. The record highlighted in red indicates the last methylation site significantly associated with the outcome according to Bonferroni correction and the blue highlighted record the last significant according to false-discovery rate.<sup>5</sup> The estimates and *P*-values are based on the reference free EWAS model of Houseman<sup>6,7</sup> with DNAm as outcome and phenotype, all covariates inclusive 30 control probe PCs and K=9 latent dimensions instead of 6 cell mix adjustment as independent variables. Inflation due to genomic control is 0.775 and is 0.203 according to van Iterson's "bacon-method".<sup>9</sup>

**Supplementary Table S26: Percent change in DNA-methylation by FMI unit (kg/m<sup>2</sup>) for the top 50 probes from the reference free EWAS model (K=9).**

| Rank | CpG ID     | CHR | Gene                | UCSC REFGENE GROUP   | RELATION<br>TO UCSC<br>CPG<br>ISLAND | Position<br>(bp) | % DNAm<br>Change (SE)<br>per FMI unit | P-value  | Bon-<br>ferroni | FDR      |
|------|------------|-----|---------------------|----------------------|--------------------------------------|------------------|---------------------------------------|----------|-----------------|----------|
| 1    | cg08692210 | 3   | <i>WDR51A</i>       | TSS200;TSS200;TSS200 | Island                               | 52188851         | 0.72 (0.10)                           | 5.66E-13 | 2.44E-07        | 2.44E-07 |
| 2    | cg13850887 | 2   | <i>SNED1</i>        | Body                 | S_Shore                              | 241993303        | -0.94 (0.13)                          | 4.43E-12 | 1.91E-06        | 9.55E-07 |
| 3    | cg26627956 | 2   | <i>CFLAR</i>        | Body;Body;Body       |                                      | 202004766        | -0.74 (0.11)                          | 1.31E-11 | 5.67E-06        | 1.89E-06 |
| 4    | cg06594770 | 22  | <i>TRIOBP</i>       | TSS200               |                                      | 38092974         | 0.31 (0.05)                           | 3.98E-11 | 1.72E-05        | 4.29E-06 |
| 5    | cg22264170 | 6   |                     |                      |                                      | 9722973          | -1.02 (0.16)                          | 4.26E-10 | 1.84E-04        | 3.68E-05 |
| 6    | cg17203352 | 17  | <i>WFIKN2</i>       | TSS200               |                                      | 48912487         | -0.90 (0.15)                          | 1.70E-09 | 7.34E-04        | 1.22E-04 |
| 7    | cg26867987 | 6   | <i>COL11A2</i>      | 3'UTR;3'UTR;3'UTR    | S_Shore                              | 33131450         | -0.82 (0.13)                          | 2.57E-09 | 1.11E-03        | 1.58E-04 |
| 8    | cg01166564 | 2   | <i>C2orf18</i>      | Body                 | Island                               | 26987492         | 0.25 (0.04)                           | 7.37E-09 | 3.18E-03        | 3.97E-04 |
| 9    | cg07894717 | 1   | <i>APITD1;CORT</i>  | Body;TSS1500         |                                      | 10508598         | -0.82 (0.14)                          | 1.28E-08 | 5.50E-03        | 5.98E-04 |
| 10   | cg17378617 | 11  | <i>NXF1;NXF1</i>    | Body;Body            | N_Shore                              | 62572592         | 0.42 (0.07)                           | 1.39E-08 | 5.98E-03        | 5.98E-04 |
| 11   | cg07764575 | 19  | <i>CATSPERG</i>     | Body                 | N_Shore                              | 38850992         | -1.14 (0.20)                          | 1.64E-08 | 7.06E-03        | 6.42E-04 |
| 12   | cg09121478 | 1   | <i>SLC2A7</i>       | TSS200               |                                      | 9086460          | -0.78 (0.14)                          | 2.36E-08 | 1.02E-02        | 8.49E-04 |
| 13   | cg14621090 | 13  |                     |                      |                                      | 113571679        | -0.79 (0.14)                          | 3.66E-08 | 1.58E-02        | 1.21E-03 |
| 14   | cg26401512 | 1   | <i>ZNF643</i>       | Body                 |                                      | 40922773         | -0.78 (0.14)                          | 5.39E-08 | 2.33E-02        | 1.66E-03 |
| 15   | cg12379720 | 22  | <i>TRIOBP</i>       | TSS200               |                                      | 38092989         | 0.51 (0.09)                           | 1.07E-07 | 4.63E-02        | 3.09E-03 |
| 16   | cg15026574 | 3   | <i>ST6GAL1</i>      | 5'UTR;5'UTR          |                                      | 186683429        | -0.74 (0.14)                          | 1.44E-07 | 6.19E-02        | 3.87E-03 |
| 17   | cg22798261 | 19  | <i>THEG</i>         | TSS1500;TSS1500      | S_Shore                              | 376653           | -2.31 (0.43)                          | 1.79E-07 | 7.74E-02        | 4.55E-03 |
| 18   | cg24093300 | 7   | <i>PTPRN2</i>       | Body;Body;Body       |                                      | 157543805        | -0.64 (0.12)                          | 2.90E-07 | 1.25E-01        | 6.94E-03 |
| 19   | cg06644488 | 22  | <i>TRIOBP</i>       | TSS200               |                                      | 38092896         | 0.35 (0.07)                           | 3.79E-07 | 1.64E-01        | 8.61E-03 |
| 20   | cg06825849 | 16  | <i>LOC342346</i>    | Body                 |                                      | 4635594          | 0.31 (0.06)                           | 4.28E-07 | 1.84E-01        | 9.22E-03 |
| 21   | cg23090396 | 1   | <i>MEGF6</i>        | Body                 |                                      | 3407936          | -0.16 (0.03)                          | 1.23E-06 | 5.30E-01        | 2.52E-02 |
| 22   | cg22561727 | 19  | <i>DPP9</i>         | Body                 | N_Shelf                              | 4719848          | -0.92 (0.19)                          | 1.75E-06 | 7.57E-01        | 3.44E-02 |
| 23   | cg01184539 | 6   | <i>FAM26D;BET3L</i> | TSS1500;Body         |                                      | 116848950        | 0.66 (0.14)                           | 1.90E-06 | 8.19E-01        | 3.54E-02 |
| 24   | cg14398659 | 11  | <i>INTS4</i>        | TSS200               | Island                               | 77705832         | -0.12 (0.02)                          | 2.04E-06 | 8.79E-01        | 3.54E-02 |
| 25   | cg00955911 | 14  | <i>FOXA1</i>        | Body                 | Island                               | 38061988         | 0.46 (0.10)                           | 2.05E-06 | 8.84E-01        | 3.54E-02 |
| 26   | cg23052191 | 8   | <i>AZIN1</i>        | TSS200;TSS200        | Island                               | 103876402        | -0.12 (0.02)                          | 2.55E-06 | 1               | 4.13E-02 |
| 27   | cg23611697 | 2   |                     |                      |                                      | 102666444        | -0.82 (0.17)                          | 2.72E-06 | 1               | 4.13E-02 |

|    |            |    |                 |                     |         |           |              |          |   |          |
|----|------------|----|-----------------|---------------------|---------|-----------|--------------|----------|---|----------|
| 28 | cg14334161 | 10 | <i>NODAL</i>    | TSS200              | S_Shore | 72201622  | 0.98 (0.20)  | 2.73E-06 | 1 | 4.13E-02 |
| 29 | cg20776385 | 15 |                 |                     | N_Shore | 40613333  | 0.48 (0.10)  | 2.78E-06 | 1 | 4.13E-02 |
| 30 | cg19358373 | 12 |                 |                     | S_Shore | 133414571 | 0.97 (0.20)  | 2.96E-06 | 1 | 4.15E-02 |
| 31 | cg01127608 | 9  | <i>LMX1B</i>    | Body                | Island  | 129377854 | 7.56 (1.59)  | 2.99E-06 | 1 | 4.15E-02 |
| 32 | cg12403162 | 10 | <i>ABLIM1</i>   | Body;Body;Body      | S_Shelf | 116394557 | -0.89 (0.19) | 3.49E-06 | 1 | 4.71E-02 |
| 33 | cg05120716 | 16 | <i>PRKCB</i>    | Body;Body           |         | 23881993  | -0.95 (0.20) | 4.48E-06 | 1 | 5.86E-02 |
| 34 | cg23681745 | 2  | <i>CFLAR</i>    | Body;Body;Body      |         | 202004875 | -0.86 (0.19) | 4.72E-06 | 1 | 5.99E-02 |
| 35 | cg09245901 | 6  |                 |                     |         | 132075947 | 1.00 (0.22)  | 5.95E-06 | 1 | 7.31E-02 |
| 36 | cg08541599 | 19 | <i>BSG</i>      | Body;Body;Body      | Island  | 579501    | -0.96 (0.21) | 6.10E-06 | 1 | 7.31E-02 |
| 37 | cg10877187 | 10 | <i>LIPN</i>     | Body                |         | 90529889  | -0.76 (0.17) | 6.45E-06 | 1 | 7.51E-02 |
| 38 | cg04219544 | 17 | <i>KRT24</i>    | TSS200              |         | 38860042  | -0.81 (0.18) | 7.80E-06 | 1 | 8.85E-02 |
| 39 | cg24102266 | 1  | <i>KIAA1522</i> | Body                | Island  | 33219584  | -0.09 (0.02) | 8.43E-06 | 1 | 9.02E-02 |
| 40 | cg14289863 | 9  | <i>SMC5</i>     | TSS1500             | N_Shore | 72872391  | -0.51 (0.11) | 8.60E-06 | 1 | 9.02E-02 |
| 41 | cg16726039 | 12 |                 |                     | Island  | 133413162 | 1.37 (0.30)  | 8.75E-06 | 1 | 9.02E-02 |
| 42 | cg22062432 | 5  |                 |                     | S_Shore | 180634502 | 0.48 (0.11)  | 8.80E-06 | 1 | 9.02E-02 |
| 43 | cg11084035 | 11 | <i>GANAB</i>    | 1stExon;1stExon     | Island  | 62414045  | -0.08 (0.02) | 8.99E-06 | 1 | 9.02E-02 |
| 44 | cg16115720 | 1  | <i>CD34</i>     | 1stExon;1stExon     | Island  | 208084415 | 0.10 (0.02)  | 9.52E-06 | 1 | 9.23E-02 |
| 45 | cg02682525 | 11 | <i>ANKK1</i>    | TSS1500             | N_Shore | 113258277 | 0.78 (0.17)  | 9.70E-06 | 1 | 9.23E-02 |
| 46 | cg05691152 | 22 | <i>TRIOBP</i>   | TSS200              |         | 38092978  | 0.43 (0.10)  | 9.84E-06 | 1 | 9.23E-02 |
| 47 | cg02853524 | 3  |                 |                     |         | 145768808 | -0.97 (0.22) | 1.06E-05 | 1 | 9.77E-02 |
| 48 | cg12610207 | 12 | <i>TBX5</i>     | Body;Body;Body;Body | Island  | 114833950 | 0.14 (0.03)  | 1.12E-05 | 1 | 9.92E-02 |
| 49 | cg15809858 | 5  | <i>PPARGC1B</i> | Body                | Island  | 149111017 | 0.79 (0.18)  | 1.13E-05 | 1 | 9.92E-02 |
| 50 | cg26872151 | 10 | <i>PIP4K2A</i>  | Body                |         | 22908265  | -1.21 (0.27) | 1.16E-05 | 1 | 1.00E-01 |

Genes in brackets indicate manual annotation for closest genes using the UCSC genome browser on human GRCh37/hg19 assembly. The record highlighted in red indicates the last methylation site significantly associated with the outcome according to Bonferroni correction and the blue highlighted record the last significant according to false-discovery rate.<sup>5</sup> The estimates and *P*-values are based on the reference free EWAS model of Houseman<sup>6,7</sup> with DNAm as outcome and phenotype, all covariates inclusive 30 control probe PCs and K=9 latent dimensions instead of 6 cell mix adjustment as independent variables. Inflation due to genomic control is 0.765 and is 0.200 according to van Iterson's "bacon-method".<sup>9</sup>

**Supplementary Table S27: Percent change in DNA-methylation by FFM unit (kg) for the top 50 probes from the reference free EWAS model (K=9).**

| Rank | CpG ID     | CHR | Gene            | UCSC REFGENE GROUP              | RELATION<br>TO UCSC<br>CPG<br>ISLAND | Position<br>(bp) | % DNAm<br>Change (SE)<br>per FFM unit | P-value  | Bon-<br>ferroni | FDR      |
|------|------------|-----|-----------------|---------------------------------|--------------------------------------|------------------|---------------------------------------|----------|-----------------|----------|
| 1    | cg08692210 | 3   | <i>WDR51A</i>   | TSS200;TSS200;TSS200            | Island                               | 52188851         | 0.26 (0.05)                           | 3.37E-07 | 1.45E-01        | 1.08E-01 |
| 2    | cg19903596 | 5   |                 |                                 | Island                               | 180527369        | 0.56 (0.11)                           | 5.16E-07 | 2.22E-01        | 1.08E-01 |
| 3    | cg07015354 | 15  | <i>CA12</i>     | TSS1500;TSS1500                 | S_Shore                              | 63675552         | 0.31 (0.06)                           | 7.52E-07 | 3.24E-01        | 1.08E-01 |
| 4    | cg22789237 | 1   |                 |                                 |                                      | 232684368        | 0.38 (0.08)                           | 1.71E-06 | 7.39E-01        | 1.50E-01 |
| 5    | cg21363348 | 7   | <i>TMEM140</i>  | TSS1500                         |                                      | 134832221        | -0.32 (0.07)                          | 2.44E-06 | 1               | 1.50E-01 |
| 6    | cg26884027 | 1   | <i>PTPRU</i>    | Body;Body;Body                  | Island                               | 29586418         | -0.08 (0.02)                          | 2.54E-06 | 1               | 1.50E-01 |
| 7    | cg25525825 | 6   | <i>TRIM27</i>   | Body                            | N_Shore                              | 28889919         | 0.42 (0.09)                           | 2.78E-06 | 1               | 1.50E-01 |
| 8    | cg24999308 | 15  | <i>NPTN</i>     | 1stExon;1stExon;1stExon;1stExon | Island                               | 73925545         | 0.08 (0.02)                           | 3.44E-06 | 1               | 1.50E-01 |
| 9    | cg26721877 | 5   | <i>STC2</i>     | TSS1500                         | Island                               | 172757074        | 0.28 (0.06)                           | 3.75E-06 | 1               | 1.50E-01 |
| 10   | cg22133562 | 12  |                 |                                 | S_Shore                              | 115106488        | 0.23 (0.05)                           | 3.80E-06 | 1               | 1.50E-01 |
| 11   | cg00306523 | 8   |                 |                                 |                                      | 94257369         | 0.30 (0.06)                           | 4.60E-06 | 1               | 1.50E-01 |
| 12   | cg01409343 | 17  | <i>TMEM49</i>   | Body                            |                                      | 57915740         | 0.72 (0.16)                           | 4.86E-06 | 1               | 1.50E-01 |
| 13   | cg03125427 | 16  | <i>CYBA</i>     | TSS200                          | Island                               | 88717482         | -0.12 (0.03)                          | 5.04E-06 | 1               | 1.50E-01 |
| 14   | cg23470262 | 12  | <i>GOLGA3</i>   | Body                            |                                      | 133383213        | 0.25 (0.05)                           | 5.26E-06 | 1               | 1.50E-01 |
| 15   | cg05911774 | X   | <i>SRPX2</i>    | 1stExon;5'UTR                   |                                      | 99899345         | 0.29 (0.06)                           | 5.52E-06 | 1               | 1.50E-01 |
| 16   | cg23092576 | 1   | <i>ECE1</i>     | TSS1500                         | Island                               | 21672253         | 0.05 (0.01)                           | 5.66E-06 | 1               | 1.50E-01 |
| 17   | cg03810768 | 2   | <i>EDAR</i>     | TSS200                          |                                      | 109606018        | 0.51 (0.11)                           | 5.97E-06 | 1               | 1.50E-01 |
| 18   | cg01933946 | 1   | <i>C1orf109</i> | Body                            | N_Shore                              | 38155525         | -0.05 (0.01)                          | 6.28E-06 | 1               | 1.50E-01 |
| 19   | cg06357843 | 22  | <i>PANX2</i>    | Body;Body;Body                  | Island                               | 50616150         | 0.56 (0.12)                           | 7.40E-06 | 1               | 1.68E-01 |
| 20   | cg06318624 | 2   |                 |                                 |                                      | 174913188        | 0.47 (0.10)                           | 1.03E-05 | 1               | 1.97E-01 |
| 21   | cg16520815 | 16  | <i>MGRN1</i>    | Body;Body;Body;Body             | Island                               | 4733181          | 0.57 (0.13)                           | 1.04E-05 | 1               | 1.97E-01 |
| 22   | cg13281171 | 6   | <i>SYCP2L</i>   | TSS200                          | N_Shore                              | 10887003         | 0.12 (0.03)                           | 1.18E-05 | 1               | 1.97E-01 |
| 23   | cg05715492 | 7   | <i>ARPC1B</i>   | Body                            | S_Shore                              | 98991138         | 0.72 (0.16)                           | 1.18E-05 | 1               | 1.97E-01 |
| 24   | cg05022368 | 8   | <i>ADAM9</i>    | Body;Body;Body;Body             | S_Shelf                              | 38858552         | 0.38 (0.09)                           | 1.20E-05 | 1               | 1.97E-01 |
| 25   | cg26794885 | 8   |                 |                                 |                                      | 12908302         | 0.57 (0.13)                           | 1.23E-05 | 1               | 1.97E-01 |
| 26   | cg22590032 | 5   | <i>FLT4</i>     | Body;Body                       | S_Shore                              | 180050565        | 0.29 (0.06)                           | 1.24E-05 | 1               | 1.97E-01 |
| 27   | cg15490703 | 19  | <i>EFNA2</i>    | Body                            | Island                               | 1295624          | 0.24 (0.05)                           | 1.30E-05 | 1               | 1.97E-01 |

|    |            |    |                    |                    |         |           |              |          |   |          |
|----|------------|----|--------------------|--------------------|---------|-----------|--------------|----------|---|----------|
| 28 | cg27038634 | 8  |                    |                    | N_Shore | 49468341  | 0.51 (0.11)  | 1.30E-05 | 1 | 1.97E-01 |
| 29 | cg01127586 | X  | <i>LOC92249</i>    | TSS200             |         | 62780937  | -0.50 (0.11) | 1.35E-05 | 1 | 1.97E-01 |
| 30 | cg21067465 | 11 | <i>ME3</i>         | Body;Body;Body     |         | 86304288  | 0.21 (0.05)  | 1.37E-05 | 1 | 1.97E-01 |
| 31 | cg21620524 | 5  | <i>SLC9A3</i>      | Body               | Island  | 500521    | -0.28 (0.06) | 1.49E-05 | 1 | 2.02E-01 |
| 32 | cg04515533 | 1  |                    |                    | N_Shore | 231295786 | 0.30 (0.07)  | 1.50E-05 | 1 | 2.02E-01 |
| 33 | cg03996020 | 7  | <i>DNAJB6</i>      | Body               |         | 157180124 | 0.65 (0.15)  | 1.64E-05 | 1 | 2.14E-01 |
| 34 | cg13964068 | 9  |                    |                    | Island  | 69197721  | 0.25 (0.06)  | 1.73E-05 | 1 | 2.19E-01 |
| 35 | cg26072437 | 4  | <i>CLCN3</i>       | Body;Body          |         | 170581380 | -0.36 (0.08) | 1.84E-05 | 1 | 2.26E-01 |
| 36 | cg26882525 | 5  | <i>SLC36A3</i>     | Body;Body          |         | 150677867 | -2.71 (0.62) | 1.90E-05 | 1 | 2.28E-01 |
| 37 | cg03045133 | 6  | <i>HCG2P7</i>      | Body               |         | 29870056  | -0.51 (0.12) | 1.99E-05 | 1 | 2.32E-01 |
| 38 | cg25378085 | 17 | <i>EME1;MRPL27</i> | TSS200;Body;TSS200 | Island  | 48450457  | -0.09 (0.02) | 2.17E-05 | 1 | 2.43E-01 |
| 39 | cg16045677 | 6  | <i>BTNL2</i>       | Body               |         | 32362678  | -0.26 (0.06) | 2.20E-05 | 1 | 2.43E-01 |
| 40 | cg14163502 | 9  | <i>KCNT1</i>       | Body               |         | 138619497 | 0.38 (0.09)  | 2.32E-05 | 1 | 2.45E-01 |
| 41 | cg21483906 | 3  | <i>CLASP2</i>      | Body               | N_Shore | 33758870  | 0.27 (0.06)  | 2.38E-05 | 1 | 2.45E-01 |
| 42 | cg22030032 | 19 | <i>EGLN2</i>       | Body;Body          | N_Shelf | 41312792  | 0.35 (0.08)  | 2.38E-05 | 1 | 2.45E-01 |
| 43 | cg21515349 | 17 | <i>NAGS;PYY</i>    | TSS200;TSS200      | Island  | 42082028  | 0.14 (0.03)  | 2.59E-05 | 1 | 2.55E-01 |
| 44 | cg17278466 | 17 | <i>USP36</i>       | Body               | Island  | 76798203  | 0.20 (0.05)  | 2.64E-05 | 1 | 2.55E-01 |
| 45 | cg15661473 | 19 | <i>NKPD1</i>       | Body               | Island  | 45656123  | 0.26 (0.06)  | 2.66E-05 | 1 | 2.55E-01 |
| 46 | cg04546471 | 12 | <i>RPL41</i>       | TSS200;TSS200      | N_Shore | 56510299  | -0.07 (0.02) | 2.80E-05 | 1 | 2.63E-01 |
| 47 | cg16170760 | X  | <i>LAGE3</i>       | TSS1500            | S_Shore | 153708103 | -0.27 (0.06) | 2.90E-05 | 1 | 2.66E-01 |
| 48 | cg23969559 | 1  | <i>ETV3</i>        | TSS1500;TSS1500    | S_Shore | 157108676 | -0.07 (0.02) | 3.00E-05 | 1 | 2.69E-01 |
| 49 | cg19358373 | 12 |                    |                    | S_Shore | 133414571 | 0.46 (0.11)  | 3.08E-05 | 1 | 2.71E-01 |
| 50 | cg12121643 | 3  | <i>DGKG</i>        | Body;Body;Body     | Island  | 185911796 | 0.40 (0.09)  | 3.22E-05 | 1 | 2.78E-01 |

Genes in brackets indicate manual annotation for closest genes using the UCSC genome browser on human GRCh37/hg19 assembly. The record highlighted in red indicates the last methylation site significantly associated with the outcome according to Bonferroni correction and the blue highlighted record the last significant according to false-discovery rate.<sup>5</sup> Here no methylation site is significantly associated neither by Bonferroni nor by FDR criteria. The estimates and *P*-values are based on the reference free EWAS model of Houseman<sup>6,7</sup> with DNAm as outcome and phenotype, all covariates inclusive 30 control probe PCs and K=9 latent dimensions instead of 6 cell mix adjustment as independent variables. Inflation due to genomic control is 0.825 and is 0.203 according to van Iterson's "bacon-method".<sup>9</sup>

**Supplementary Table S28: Percent change in DNA-methylation by FFMI unit (kg/m<sup>2</sup>) for the top 50 probes from the reference free EWAS model (K=9).**

| Rank | CpG ID     | CHR | Gene             | UCSC REFGENE GROUP      | RELATION<br>TO UCSC<br>CPG<br>ISLAND | Position<br>(bp) | % DNAm<br>change (SE)<br>per FFMI unit | P-value  | Bon-<br>ferroni | FDR      |
|------|------------|-----|------------------|-------------------------|--------------------------------------|------------------|----------------------------------------|----------|-----------------|----------|
| 1    | cg21165061 | 15  | <i>DISP2</i>     | Body                    | Island                               | 40651101         | 0.88 (0.16)                            | 5.52E-08 | 2.38E-02        | 2.38E-02 |
| 2    | cg05715492 | 7   | <i>ARPC1B</i>    | Body                    | S_Shore                              | 98991138         | 1.66 (0.31)                            | 1.93E-07 | 8.34E-02        | 2.98E-02 |
| 3    | cg06437396 | 6   |                  |                         | N_Shore                              | 108437013        | 0.53 (0.10)                            | 2.07E-07 | 8.93E-02        | 2.98E-02 |
| 4    | cg04010122 | 2   | <i>SOS1</i>      | Body                    | N_Shore                              | 39346883         | 0.44 (0.09)                            | 5.93E-07 | 2.56E-01        | 5.49E-02 |
| 5    | cg24586432 | 2   | <i>SCLY</i>      | TSS1500                 | Island                               | 238969253        | 0.13 (0.03)                            | 6.36E-07 | 2.74E-01        | 5.49E-02 |
| 6    | cg08692210 | 3   | <i>WDR51A</i>    | TSS200;TSS200;TSS200    | Island                               | 52188851         | 0.50 (0.10)                            | 1.04E-06 | 4.48E-01        | 7.47E-02 |
| 7    | cg26867987 | 6   | <i>COL11A2</i>   | 3'UTR;3'UTR;3'UTR       | S_Shore                              | 33131450         | -0.68 (0.14)                           | 1.58E-06 | 6.81E-01        | 8.76E-02 |
| 8    | cg02518775 | 11  | <i>CNIH2</i>     | Body                    | S_Shore                              | 66046770         | 0.72 (0.15)                            | 1.62E-06 | 7.01E-01        | 8.76E-02 |
| 9    | cg22798261 | 19  | <i>THEG</i>      | TSS1500;TSS1500         | S_Shore                              | 376653           | -2.08 (0.43)                           | 2.02E-06 | 8.72E-01        | 9.18E-02 |
| 10   | cg04764597 | 10  | <i>C10orf107</i> | Body                    |                                      | 63510947         | 0.35 (0.07)                            | 2.13E-06 | 9.18E-01        | 9.18E-02 |
| 11   | cg03091512 | 2   | <i>RHBDD1</i>    | 5'UTR;5'UTR             | Island                               | 227701050        | -0.17 (0.04)                           | 3.08E-06 | 1               | 1.14E-01 |
| 12   | cg01178624 | 11  | <i>KCNK7</i>     | 3'UTR;3'UTR;3'UTR;3'UTR | Island                               | 65360327         | 2.13 (0.45)                            | 3.22E-06 | 1               | 1.14E-01 |
| 13   | cg17935297 | 19  | <i>CILP2</i>     | Body                    | Island                               | 19651968         | 0.28 (0.06)                            | 3.64E-06 | 1               | 1.14E-01 |
| 14   | cg10428938 | 7   | <i>ARPC1B</i>    | Body                    | Island                               | 98990837         | 1.71 (0.36)                            | 3.71E-06 | 1               | 1.14E-01 |
| 15   | cg04219544 | 17  | <i>KRT24</i>     | TSS200                  |                                      | 38860042         | -0.84 (0.18)                           | 4.01E-06 | 1               | 1.15E-01 |
| 16   | cg17603909 | 11  | <i>OR52K1</i>    | TSS1500                 |                                      | 4509357          | 0.61 (0.13)                            | 5.09E-06 | 1               | 1.35E-01 |
| 17   | cg03545246 | 1   |                  |                         | Island                               | 227976522        | 0.24 (0.05)                            | 5.34E-06 | 1               | 1.35E-01 |
| 18   | cg10119082 | 7   | <i>ARPC1B</i>    | Body                    | Island                               | 98990626         | 0.90 (0.20)                            | 7.24E-06 | 1               | 1.73E-01 |
| 19   | cg11252801 | 2   | <i>LRRTM4</i>    | 5'UTR;5'UTR             |                                      | 77748917         | 0.70 (0.15)                            | 7.62E-06 | 1               | 1.73E-01 |
| 20   | cg26882525 | 5   | <i>SLC36A3</i>   | Body;Body               |                                      | 150677867        | -5.73 (1.27)                           | 8.58E-06 | 1               | 1.79E-01 |
| 21   | cg14759565 | 11  |                  |                         | Island                               | 65360123         | 1.89 (0.42)                            | 8.79E-06 | 1               | 1.79E-01 |
| 22   | cg00271204 | 5   |                  |                         | N_Shore                              | 139142898        | 0.62 (0.14)                            | 9.12E-06 | 1               | 1.79E-01 |
| 23   | cg06552618 | 12  | <i>SMUG1</i>     | 5'UTR                   |                                      | 54582532         | -0.22 (0.05)                           | 1.02E-05 | 1               | 1.92E-01 |
| 24   | cg12379720 | 22  | <i>TRIOBP</i>    | TSS200                  |                                      | 38092989         | 0.40 (0.09)                            | 1.09E-05 | 1               | 1.93E-01 |
| 25   | cg01976623 | 14  | <i>PRIMA1</i>    | TSS1500                 | S_Shore                              | 94255901         | 0.93 (0.21)                            | 1.12E-05 | 1               | 1.93E-01 |
| 26   | cg25525825 | 6   | <i>TRIM27</i>    | Body                    | N_Shore                              | 28889919         | 0.81 (0.18)                            | 1.31E-05 | 1               | 2.17E-01 |
| 27   | cg26401512 | 1   | <i>ZNF643</i>    | Body                    |                                      | 40922773         | -0.65 (0.15)                           | 1.43E-05 | 1               | 2.28E-01 |

|    |            |    |                  |                                                  |         |           |              |          |   |          |
|----|------------|----|------------------|--------------------------------------------------|---------|-----------|--------------|----------|---|----------|
| 28 | cg04267436 | 14 | <i>ZDHHC22</i>   | TSS200                                           | Island  | 77608303  | 0.47 (0.11)  | 1.55E-05 | 1 | 2.39E-01 |
| 29 | cg24398379 | 7  | <i>LOC650226</i> | TSS200                                           | S_Shore | 56516076  | -1.33 (0.30) | 1.76E-05 | 1 | 2.53E-01 |
| 30 | cg25941299 | 7  |                  |                                                  | S_Shore | 113727916 | 1.16 (0.27)  | 1.76E-05 | 1 | 2.53E-01 |
| 31 | cg24999308 | 15 | <i>NPTN</i>      | 1stExon;1stExon;1stExon;1stExon                  | Island  | 73925545  | 0.16 (0.04)  | 1.83E-05 | 1 | 2.53E-01 |
| 32 | cg06965803 | 1  | <i>PLEKHG5</i>   | Body;Body;Body;Body;Body                         | Island  | 6531717   | 0.99 (0.23)  | 1.88E-05 | 1 | 2.53E-01 |
| 33 | cg00250743 | 10 | <i>FGFR2</i>     | Body;Body;Body;Body;Body;<br>Body;Body;Body;Body |         | 123264130 | -0.66 (0.15) | 1.93E-05 | 1 | 2.53E-01 |
| 34 | cg07764575 | 19 | <i>CATSPERG</i>  | Body                                             | N_Shore | 38850992  | -0.81 (0.19) | 2.21E-05 | 1 | 2.80E-01 |
| 35 | cg05709879 | 5  |                  |                                                  | N_Shelf | 141067731 | -1.08 (0.25) | 2.33E-05 | 1 | 2.87E-01 |
| 36 | cg10866060 | 12 |                  |                                                  |         | 83592588  | 1.30 (0.30)  | 2.51E-05 | 1 | 3.00E-01 |
| 37 | cg14124917 | 2  | <i>GRHL1</i>     | TSS1500                                          | Island  | 10090974  | 0.34 (0.08)  | 2.62E-05 | 1 | 3.05E-01 |
| 38 | cg15026574 | 3  | <i>ST6GAL1</i>   | 5'UTR;5'UTR                                      |         | 186683429 | -0.55 (0.13) | 2.86E-05 | 1 | 3.24E-01 |
| 39 | cg16810626 | 8  | <i>GATA4</i>     | Body                                             |         | 11594003  | 1.34 (0.32)  | 3.09E-05 | 1 | 3.34E-01 |
| 40 | cg13654525 | 11 | <i>KCNK7</i>     | Body;3'UTR;3'UTR;3'UTR                           | S_Shore | 65360509  | 1.19 (0.28)  | 3.11E-05 | 1 | 3.34E-01 |
| 41 | cg15059562 | 7  |                  |                                                  | Island  | 65235696  | 0.48 (0.11)  | 3.17E-05 | 1 | 3.34E-01 |
| 42 | cg03810768 | 2  | <i>EDAR</i>      | TSS200                                           |         | 109606018 | 0.92 (0.22)  | 3.39E-05 | 1 | 3.37E-01 |
| 43 | cg12321193 | 13 | <i>EDNRB</i>     | TSS1500                                          |         | 78550384  | -0.62 (0.15) | 3.44E-05 | 1 | 3.37E-01 |
| 44 | cg21532325 | 7  | <i>WDR86</i>     | TSS1500                                          | Island  | 151107400 | -0.23 (0.05) | 3.48E-05 | 1 | 3.37E-01 |
| 45 | cg12610207 | 12 | <i>TBX5</i>      | Body;Body;Body;Body                              | Island  | 114833950 | 0.14 (0.03)  | 3.52E-05 | 1 | 3.37E-01 |
| 46 | cg08144588 | 3  | <i>CNTN4</i>     | Body;TSS1500;Body                                |         | 3080327   | 2.23 (0.53)  | 3.84E-05 | 1 | 3.44E-01 |
| 47 | cg05911774 | X  | <i>SRPX2</i>     | 1stExon;5'UTR                                    |         | 99899345  | 0.57 (0.14)  | 3.99E-05 | 1 | 3.44E-01 |
| 48 | cg09245901 | 6  |                  |                                                  |         | 132075947 | 1.18 (0.28)  | 4.02E-05 | 1 | 3.44E-01 |
| 49 | cg16570885 | 3  | <i>IGF2BP2</i>   | Body;Body                                        |         | 185476452 | -5.13 (1.23) | 4.08E-05 | 1 | 3.44E-01 |
| 50 | cg15466176 | 12 |                  |                                                  |         | 114781410 | 0.67 (0.16)  | 4.14E-05 | 1 | 3.44E-01 |

Genes in brackets indicate manual annotation for closest genes using the UCSC genome browser on human GRCh37/hg19 assembly. The record highlighted in red indicates the last methylation site significantly associated with the outcome according to Bonferroni correction and the blue highlighted record the last significant according to false-discovery rate.<sup>5</sup> The estimates and *P*-values are based on the reference free EWAS model of Houseman<sup>6,7</sup> with DNAm as outcome and phenotype, all covariates inclusive 30 control probe PCs and K=9 latent dimensions instead of 6 cell mix adjustment as independent variables. Inflation due to genomic control<sup>8</sup> is 0.743 and is 0.198 according to van Iterson's "bacon-method".<sup>9</sup>



**Supplementary Table S29: Change in BMI (kg/m<sup>2</sup>) per percent change in DNA-methylation adj. for maternal smoking during pregnancy (top 50 probes).**

| Rank | CpG ID     | CHR | Gene                    | UCSC REFGENE GROUP | RELATION<br>TO UCSC<br>CPG<br>ISLAND | Position<br>(bp) | Change (SE)<br>in BMI<br>per %<br>change<br>in DNAm | P-value  | Bon-<br>ferroni | FDR      |
|------|------------|-----|-------------------------|--------------------|--------------------------------------|------------------|-----------------------------------------------------|----------|-----------------|----------|
| 1    | cg13850887 | 2   | SNED1                   | Body               | S_Shore                              | 241993303        | -0.21 (0.04)                                        | 3.68E-08 | 1.59E-02        | 1.59E-02 |
| 2    | cg01706498 | 3   | KLHL6                   | Body               |                                      | 183260375        | 0.19 (0.03)                                         | 8.68E-08 | 3.74E-02        | 1.87E-02 |
| 3    | cg26401512 | 1   | ZNF643                  | Body               |                                      | 40922773         | -0.20 (0.04)                                        | 1.50E-07 | 6.46E-02        | 2.15E-02 |
| 4    | cg17935297 | 19  | CILP2                   | Body               | Island                               | 19651968         | 0.41 (0.08)                                         | 3.18E-07 | 1.37E-01        | 2.81E-02 |
| 5    | cg15026574 | 3   | ST6GAL1                 | 5'UTR;5'UTR        |                                      | 186683429        | -0.21 (0.04)                                        | 3.26E-07 | 1.41E-01        | 2.81E-02 |
| 6    | cg26867987 | 6   | COL11A2                 | 3'UTR;3'UTR;3'UTR  | S_Shore                              | 33131450         | -0.18 (0.04)                                        | 4.97E-07 | 2.14E-01        | 2.87E-02 |
| 7    | cg21525627 | 12  | (ZDHC17)                |                    |                                      | 77149647         | 0.24 (0.05)                                         | 5.31E-07 | 2.29E-01        | 2.87E-02 |
| 8    | cg21126338 | 13  | FARP1                   | Body               |                                      | 99084698         | 0.32 (0.06)                                         | 5.49E-07 | 2.37E-01        | 2.87E-02 |
| 9    | cg17810765 | 2   | ANO7                    | TSS200;TSS200      |                                      | 242127836        | 0.14 (0.03)                                         | 5.98E-07 | 2.58E-01        | 2.87E-02 |
| 10   | cg18704658 | 17  |                         |                    | N_Shelf                              | 80300165         | 0.38 (0.08)                                         | 7.28E-07 | 3.14E-01        | 3.00E-02 |
| 11   | cg26618041 | 19  | CILP2                   | Body               | Island                               | 19651867         | 0.19 (0.04)                                         | 7.74E-07 | 3.34E-01        | 3.00E-02 |
| 12   | cg06594770 | 22  | TRIOBP                  | TSS200             |                                      | 38092974         | 0.44 (0.09)                                         | 8.35E-07 | 3.60E-01        | 3.00E-02 |
| 13   | cg17989572 | 17  | RAB5C                   | 5'UTR;5'UTR        | N_Shore                              | 40306700         | -0.51 (0.10)                                        | 9.29E-07 | 4.01E-01        | 3.08E-02 |
| 14   | cg08074767 | 6   | (MLLT4)                 |                    |                                      | 168113741        | -0.12 (0.02)                                        | 1.07E-06 | 4.60E-01        | 3.19E-02 |
| 15   | cg27285599 | 17  | TBCD;ZNF750             | Body;TSS200        |                                      | 80798023         | 0.33 (0.07)                                         | 1.18E-06 | 5.08E-01        | 3.19E-02 |
| 16   | cg06369443 | 1   | KCNQ4                   | Body;Body          | N_Shore                              | 41303048         | 0.34 (0.07)                                         | 1.33E-06 | 5.73E-01        | 3.19E-02 |
| 17   | cg14518658 | 22  | (CYTH4-ELFN2)           |                    | N_Shelf                              | 37726676         | 0.11 (0.02)                                         | 1.40E-06 | 6.03E-01        | 3.19E-02 |
| 18   | cg06322432 | 10  |                         |                    | N_Shore                              | 112289853        | 0.13 (0.03)                                         | 1.49E-06 | 6.43E-01        | 3.19E-02 |
| 19   | cg24751284 | 14  | APEX1                   | Body;Body;Body     | S_Shore                              | 20925551         | 0.23 (0.05)                                         | 1.50E-06 | 6.49E-01        | 3.19E-02 |
| 20   | cg26917480 | 17  | ADAP2                   | TSS1500            | N_Shore                              | 29247893         | 0.25 (0.05)                                         | 1.61E-06 | 6.94E-01        | 3.19E-02 |
| 21   | cg26995653 | 2   | (LINC01115<br>(TMEM18)) |                    |                                      | 858038           | 0.11 (0.02)                                         | 1.62E-06 | 7.01E-01        | 3.19E-02 |
| 22   | cg14795409 | 3   |                         |                    |                                      | 128267611        | -0.20 (0.04)                                        | 1.70E-06 | 7.33E-01        | 3.19E-02 |
| 23   | cg14391016 | 6   | CCR6                    | TSS1500            |                                      | 167523797        | 0.23 (0.05)                                         | 1.91E-06 | 8.23E-01        | 3.19E-02 |
| 24   | cg06437396 | 6   | OSTM1                   |                    | N_Shore                              | 108437013        | 0.20 (0.04)                                         | 1.97E-06 | 8.50E-01        | 3.19E-02 |
| 25   | cg15941159 | 22  | GRAMD4                  | 3'UTR              | S_Shore                              | 47075270         | 0.23 (0.05)                                         | 1.99E-06 | 8.58E-01        | 3.19E-02 |

|    |               |    |              |                                                 |         |           |              |          |          |          |
|----|---------------|----|--------------|-------------------------------------------------|---------|-----------|--------------|----------|----------|----------|
| 26 | cg14950834    | 19 | SPTBN4;BLVRB | TSS1500;TSS200                                  | Island  | 40971830  | -0.55 (0.11) | 2.00E-06 | 8.63E-01 | 3.19E-02 |
| 27 | cg13298389    | 7  |              |                                                 |         | 49710144  | 0.58 (0.12)  | 2.12E-06 | 9.14E-01 | 3.19E-02 |
| 28 | cg01257171    | 5  |              |                                                 | S_Shore | 172656713 | 0.41 (0.08)  | 2.12E-06 | 9.14E-01 | 3.19E-02 |
| 29 | cg14401837    | 7  | NPSR1        | TSS1500;TSS1500                                 |         | 34697493  | -0.24 (0.05) | 2.15E-06 | 9.26E-01 | 3.19E-02 |
| 30 | cg23416307    | 4  | GAK          | Body                                            |         | 858299    | 0.63 (0.13)  | 2.24E-06 | 9.65E-01 | 3.22E-02 |
| 31 | cg21332304    | 17 | NPEPPS       | Body                                            |         | 45699260  | -0.35 (0.07) | 2.31E-06 | 9.98E-01 | 3.22E-02 |
| 32 | cg10802005    | 12 |              |                                                 |         | 121404850 | 0.30 (0.06)  | 2.52E-06 | 1.00E+00 | 3.39E-02 |
| 33 | cg06217450    | 3  |              |                                                 | N_Shore | 142441654 | 0.44 (0.09)  | 2.84E-06 | 1.00E+00 | 3.52E-02 |
| 34 | cg02682525    | 11 | ANKK1        | TSS1500                                         | N_Shore | 113258277 | 0.14 (0.03)  | 2.85E-06 | 1.00E+00 | 3.52E-02 |
| 35 | cg17287326    | 10 | AVPII        | 5'UTR;1stExon                                   | Island  | 99446966  | 0.33 (0.07)  | 2.89E-06 | 1.00E+00 | 3.52E-02 |
| 36 | cg06376715    | 1  | TP73         | Body;Body;Body;Body                             | Island  | 3634918   | 0.10 (0.02)  | 3.05E-06 | 1.00E+00 | 3.52E-02 |
| 37 | cg10861407    | 9  | FSD1L        | TSS1500;TSS1500;TSS1500                         | N_Shore | 108209278 | -0.25 (0.05) | 3.20E-06 | 1.00E+00 | 3.52E-02 |
| 38 | cg02381820    | 2  |              |                                                 | Island  | 121493896 | 0.45 (0.10)  | 3.25E-06 | 1.00E+00 | 3.52E-02 |
| 39 | cg00384539    | 8  | PRDM14       | TSS200                                          | Island  | 70983567  | 0.29 (0.06)  | 3.45E-06 | 1.00E+00 | 3.52E-02 |
| 40 | cg00193021    | 4  | SNCA         | 5'UTR;1stExon;5'UTR;1stExon;1stExon;5'UTR;5'UTR | Island  | 90758120  | -0.27 (0.06) | 3.49E-06 | 1.00E+00 | 3.52E-02 |
| 41 | cg03012642    | 2  |              |                                                 |         | 21346892  | -0.19 (0.04) | 3.51E-06 | 1.00E+00 | 3.52E-02 |
| 42 | cg11245333    | 1  | MOSC1        | TSS200                                          | N_Shore | 220959931 | 0.24 (0.05)  | 3.56E-06 | 1.00E+00 | 3.52E-02 |
| 43 | cg08568550    | 11 | C11orf16     | TSS200                                          |         | 8954570   | 0.25 (0.05)  | 3.57E-06 | 1.00E+00 | 3.52E-02 |
| 44 | ch.8.1234861F | 8  | XKR4         | Body                                            |         | 56321773  | -0.82 (0.17) | 3.65E-06 | 1.00E+00 | 3.52E-02 |
| 45 | cg13345817    | 15 |              |                                                 |         | 101695660 | 0.28 (0.06)  | 3.79E-06 | 1.00E+00 | 3.52E-02 |
| 46 | cg04813904    | 5  | CD180        | Body                                            |         | 66488838  | 0.13 (0.03)  | 3.84E-06 | 1.00E+00 | 3.52E-02 |
| 47 | cg13274254    | 2  | GULP1        | 5'UTR;1stExon                                   | Island  | 189157566 | 0.32 (0.07)  | 3.85E-06 | 1.00E+00 | 3.52E-02 |
| 48 | cg24332767    | 3  | C3orf70      | TSS1500                                         | Island  | 184871524 | 0.15 (0.03)  | 3.95E-06 | 1.00E+00 | 3.52E-02 |
| 49 | cg25048701    | 11 | FOLR1        | 5'UTR;TSS1500;5'UTR;5'UTR                       |         | 71902284  | 0.43 (0.09)  | 4.00E-06 | 1.00E+00 | 3.52E-02 |
| 50 | cg15650694    | 5  | SFRS12       | TSS200;TSS1500                                  | Island  | 65439990  | 0.29 (0.06)  | 4.37E-06 | 1.00E+00 | 3.64E-02 |

Genes in brackets indicate manual annotation for closest genes using the UCSC genome browser on human GRCh37/hg19 assembly. The record highlighted in red indicates the last methylation site significantly associated with the outcome according to Bonferroni correction and the blue highlighted record the last significant according to false-discovery rate.<sup>5</sup> Cell type heterogeneity is accounted for by adjustment for 6 WBC types according to Houseman<sup>10</sup> (see methods section of main manuscript). EWAS model is same as main reference-based EWAS model (see Supplementary Tables S1-S6) but further adjusted for indicator coded variable “Any maternal smoking during pregnancy (y/n)”.

**Supplementary Table S30: Change in WHO stand. BMI per percent change in DNA-methylation adj. for maternal smoking during pregnancy (top 50 probes).**

| Rank | CpG ID     | CHR | Gene                            | UCSC REFGENE GROUP | RELATION<br>TO UCSC<br>CPG<br>ISLAND | Position<br>(bp) | Change (SE)<br>in ZBMI<br>per % change<br>in DNAm | P-value  | Bon-<br>ferroni | FDR      |
|------|------------|-----|---------------------------------|--------------------|--------------------------------------|------------------|---------------------------------------------------|----------|-----------------|----------|
| 1    | cg01706498 | 3   | <i>KLHL6</i>                    | Body               |                                      | 183260375        | 0.11 (0.02)                                       | 1.90E-07 | 8.20E-02        | 4.24E-02 |
| 2    | cg21126338 | 13  | <i>FARP1</i>                    | Body               |                                      | 99084698         | 0.20 (0.04)                                       | 1.98E-07 | 8.52E-02        | 4.24E-02 |
| 3    | cg13850887 | 2   | <i>SNED1</i>                    | Body               | S_Shore                              | 241993303        | -0.12 (0.02)                                      | 2.95E-07 | 1.27E-01        | 4.24E-02 |
| 4    | cg17935297 | 19  | <i>CILP2</i>                    | Body               | Island                               | 19651968         | 0.24 (0.05)                                       | 4.37E-07 | 1.88E-01        | 4.71E-02 |
| 5    | cg21525627 | 12  | <i>(ZDHHC17)</i>                |                    |                                      | 77149647         | 0.14 (0.03)                                       | 5.80E-07 | 2.50E-01        | 5.00E-02 |
| 6    | cg24751284 | 14  | <i>APEX1</i>                    | Body;Body;Body     | S_Shore                              | 20925551         | 0.14 (0.03)                                       | 9.66E-07 | 4.16E-01        | 6.03E-02 |
| 7    | cg27285599 | 17  | <i>TBCD;ZNF750</i>              | Body;TSS200        |                                      | 80798023         | 0.20 (0.04)                                       | 1.07E-06 | 4.60E-01        | 6.03E-02 |
| 8    | cg26618041 | 19  | <i>CILP2</i>                    | Body               | Island                               | 19651867         | 0.11 (0.02)                                       | 1.23E-06 | 5.29E-01        | 6.03E-02 |
| 9    | cg23416307 | 4   | <i>GAK</i>                      | Body               |                                      | 858299           | 0.39 (0.08)                                       | 1.39E-06 | 6.01E-01        | 6.03E-02 |
| 10   | cg06369443 | 1   | <i>KCNQ4</i>                    | Body;Body          | N_Shore                              | 41303048         | 0.20 (0.04)                                       | 1.76E-06 | 7.60E-01        | 6.03E-02 |
| 11   | cg08074767 | 6   | <i>(MLLT4)</i>                  |                    |                                      | 168113741        | -0.07 (0.01)                                      | 2.24E-06 | 9.65E-01        | 6.03E-02 |
| 12   | cg15660740 | 17  |                                 |                    | N_Shore                              | 81023473         | -0.24 (0.05)                                      | 2.69E-06 | 1.00E+00        | 6.03E-02 |
| 13   | cg17989572 | 17  | <i>RAB5C</i>                    | 5'UTR;5'UTR        | N_Shore                              | 40306700         | -0.30 (0.06)                                      | 2.71E-06 | 1.00E+00        | 6.03E-02 |
| 14   | cg18704658 | 17  |                                 |                    | N_Shelf                              | 80300165         | 0.22 (0.05)                                       | 3.06E-06 | 1.00E+00        | 6.03E-02 |
| 15   | cg04813904 | 5   | <i>CD180</i>                    | Body               |                                      | 66488838         | 0.08 (0.02)                                       | 3.22E-06 | 1.00E+00        | 6.03E-02 |
| 16   | cg26917480 | 17  | <i>ADAP2</i>                    | TSS1500            | N_Shore                              | 29247893         | 0.15 (0.03)                                       | 3.24E-06 | 1.00E+00        | 6.03E-02 |
| 17   | cg26995653 | 2   | <i>(LINC01115<br/>(TMEM18))</i> |                    |                                      | 858038           | 0.07 (0.01)                                       | 3.34E-06 | 1.00E+00        | 6.03E-02 |
| 18   | cg11504355 | 1   | <i>KIRREL</i>                   | 3'UTR              |                                      | 158065595        | 0.09 (0.02)                                       | 3.55E-06 | 1.00E+00        | 6.03E-02 |
| 19   | cg14391016 | 6   | <i>CCR6</i>                     | TSS1500            |                                      | 167523797        | 0.14 (0.03)                                       | 3.55E-06 | 1.00E+00        | 6.03E-02 |
| 20   | cg14950834 | 19  | <i>SPTBN4;BLVRB</i>             | TSS1500;TSS200     | Island                               | 40971830         | -0.33 (0.07)                                      | 3.55E-06 | 1.00E+00        | 6.03E-02 |
| 21   | cg06437396 | 6   | <i>(OSTM1)</i>                  |                    | N_Shore                              | 108437013        | 0.12 (0.03)                                       | 3.65E-06 | 1.00E+00        | 6.03E-02 |
| 22   | cg26401512 | 1   | <i>ZNF643</i>                   | Body               |                                      | 40922773         | -0.11 (0.02)                                      | 3.69E-06 | 1.00E+00        | 6.03E-02 |
| 23   | cg04979599 | 5   | <i>AFAP1L1</i>                  | TSS1500;TSS1500    | N_Shore                              | 148650899        | 0.13 (0.03)                                       | 3.78E-06 | 1.00E+00        | 6.03E-02 |
| 24   | cg17810765 | 2   | <i>ANO7;ANO7</i>                | TSS200;TSS200      |                                      | 242127836        | 0.08 (0.02)                                       | 3.93E-06 | 1.00E+00        | 6.03E-02 |
| 25   | cg14401837 | 7   | <i>NPSR1</i>                    | TSS1500;TSS1500    |                                      | 34697493         | -0.14 (0.03)                                      | 4.21E-06 | 1.00E+00        | 6.03E-02 |

|    |               |    |                        |                           |         |           |              |          |          |          |
|----|---------------|----|------------------------|---------------------------|---------|-----------|--------------|----------|----------|----------|
| 26 | cg14518658    | 22 | ( <i>CYTH4-ELFN2</i> ) |                           | N_Shelf | 37726676  | 0.06 (0.01)  | 4.27E-06 | 1.00E+00 | 6.03E-02 |
| 27 | cg13298389    | 7  |                        |                           |         | 49710144  | 0.34 (0.07)  | 4.37E-06 | 1.00E+00 | 6.03E-02 |
| 28 | cg25048701    | 11 | <i>FOLR1</i>           | 5'UTR;TSS1500;5'UTR;5'UTR |         | 71902284  | 0.26 (0.06)  | 4.40E-06 | 1.00E+00 | 6.03E-02 |
| 29 | cg06322432    | 10 |                        |                           | N_Shore | 112289853 | 0.07 (0.02)  | 4.65E-06 | 1.00E+00 | 6.03E-02 |
| 30 | cg10802005    | 12 |                        |                           |         | 121404850 | 0.18 (0.04)  | 4.85E-06 | 1.00E+00 | 6.03E-02 |
| 31 | cg17287326    | 10 | <i>AVP11</i>           | 5'UTR;1stExon             | Island  | 99446966  | 0.20 (0.04)  | 5.12E-06 | 1.00E+00 | 6.03E-02 |
| 32 | ch.8.1234861F | 8  | <i>XKR4</i>            | Body                      |         | 56321773  | -0.49 (0.11) | 5.32E-06 | 1.00E+00 | 6.03E-02 |
| 33 | cg13345817    | 15 |                        |                           |         | 101695660 | 0.17 (0.04)  | 5.54E-06 | 1.00E+00 | 6.03E-02 |
| 34 | cg13274254    | 2  | <i>GULP1</i>           | 5'UTR;1stExon             | Island  | 189157566 | 0.19 (0.04)  | 5.57E-06 | 1.00E+00 | 6.03E-02 |
| 35 | cg15026574    | 3  | <i>ST6GAL1</i>         | 5'UTR;5'UTR               |         | 186683429 | -0.11 (0.02) | 5.67E-06 | 1.00E+00 | 6.03E-02 |
| 36 | cg00384539    | 8  | <i>PRDM14</i>          | TSS200                    | Island  | 70983567  | 0.17 (0.04)  | 5.72E-06 | 1.00E+00 | 6.03E-02 |
| 37 | cg10861407    | 9  | <i>FSD1L</i>           | TSS1500;TSS1500;TSS1500   | N_Shore | 108209278 | -0.15 (0.03) | 6.02E-06 | 1.00E+00 | 6.03E-02 |
| 38 | cg14524775    | 1  | <i>ARHGEF2</i>         | Body;Body;Body            | Island  | 155920832 | 0.42 (0.09)  | 6.28E-06 | 1.00E+00 | 6.03E-02 |
| 39 | cg14795409    | 3  |                        |                           |         | 128267611 | -0.12 (0.03) | 6.35E-06 | 1.00E+00 | 6.03E-02 |
| 40 | cg11245333    | 1  | <i>MOSC1</i>           | TSS200                    | N_Shore | 220959931 | 0.14 (0.03)  | 6.39E-06 | 1.00E+00 | 6.03E-02 |
| 41 | cg26666886    | 16 | <i>ANKRD11</i>         | TSS1500                   | S_Shore | 89558024  | -0.19 (0.04) | 6.45E-06 | 1.00E+00 | 6.03E-02 |
| 42 | cg08568550    | 11 | <i>C11orf16</i>        | TSS200                    |         | 8954570   | 0.15 (0.03)  | 6.46E-06 | 1.00E+00 | 6.03E-02 |
| 43 | cg24067118    | 10 |                        |                           | N_Shore | 102806933 | 0.05 (0.01)  | 6.46E-06 | 1.00E+00 | 6.03E-02 |
| 44 | cg15941159    | 22 | <i>GRAMD4</i>          | 3'UTR                     | S_Shore | 47075270  | 0.13 (0.03)  | 6.86E-06 | 1.00E+00 | 6.03E-02 |
| 45 | cg22503047    | 6  | <i>BAT2</i>            | Body                      | S_Shore | 31601411  | -0.19 (0.04) | 6.88E-06 | 1.00E+00 | 6.03E-02 |
| 46 | cg25371332    | 2  |                        |                           |         | 10688317  | 0.11 (0.02)  | 6.94E-06 | 1.00E+00 | 6.03E-02 |
| 47 | cg26879644    | 15 |                        |                           |         | 92238013  | 0.17 (0.04)  | 6.96E-06 | 1.00E+00 | 6.03E-02 |
| 48 | cg06376715    | 1  | <i>TP73</i>            | Body;Body;Body;Body       | Island  | 3634918   | 0.06 (0.01)  | 7.03E-06 | 1.00E+00 | 6.03E-02 |
| 49 | cg27247382    | 2  | <i>PLEKHM3</i>         | 3'UTR                     |         | 208689681 | 0.32 (0.07)  | 7.04E-06 | 1.00E+00 | 6.03E-02 |
| 50 | cg09204618    | 22 | <i>TSSK2</i>           | TSS1500                   | N_Shelf | 19117090  | 0.18 (0.04)  | 7.37E-06 | 1.00E+00 | 6.03E-02 |

Genes in brackets indicate manual annotation for closest genes using the UCSC genome browser on human GRCh37/hg19 assembly. The record highlighted in red indicates the last methylation site significantly associated with the outcome according to Bonferroni correction and the blue highlighted record the last significant according to false-discovery rate.<sup>5</sup> Cell type heterogeneity is accounted for by adjustment for 6 WBC types according to Houseman<sup>10</sup> (see methods section of main manuscript). EWAS model is same as main reference-based EWAS model (see Supplementary Tables S1-S6) but further adjusted for indicator coded variable “Any maternal smoking during pregnancy (y/n)”.

**Supplementary Table S31: Change in fat mass (kg) per percent change in DNA-methylation adj. for maternal smoking during pregnancy (top 50 probes).**

| Rank | CpG ID     | CHR | Gene                    | UCSC REFGENE GROUP   | RELATION<br>TO UCSC<br>CPG<br>ISLAND | Position<br>(bp) | Change (SE)<br>in FM<br>per % change<br>in DNAm | P-value  | Bon-<br>ferroni | FDR      |
|------|------------|-----|-------------------------|----------------------|--------------------------------------|------------------|-------------------------------------------------|----------|-----------------|----------|
| 1    | cg13850887 | 2   | <i>SNED1</i>            | Body                 | S_Shore                              | 241993303        | -0.20 (0.03)                                    | 1.38E-10 | 5.93E-05        | 5.93E-05 |
| 2    | cg08692210 | 3   | <i>WDR51A</i>           | TSS200;TSS200;TSS200 | Island                               | 52188851         | 0.17 (0.03)                                     | 7.20E-08 | 3.11E-02        | 1.11E-02 |
| 3    | cg00384539 | 8   | <i>PRDM14</i>           | TSS200               | Island                               | 70983567         | 0.27 (0.05)                                     | 8.91E-08 | 3.84E-02        | 1.11E-02 |
| 4    | cg15026574 | 3   | <i>ST6GAL1</i>          | 5'UTR;5'UTR          |                                      | 186683429        | -0.18 (0.03)                                    | 1.03E-07 | 4.43E-02        | 1.11E-02 |
| 5    | cg14518658 | 22  | ( <i>CYTH4-ELFN2</i> )  |                      | N_Shelf                              | 37726676         | 0.10 (0.02)                                     | 1.99E-07 | 8.57E-02        | 1.23E-02 |
| 6    | cg04894009 | 8   | <i>PRKDC</i>            | Body;Body            |                                      | 48695125         | 0.31 (0.06)                                     | 2.22E-07 | 9.58E-02        | 1.23E-02 |
| 7    | cg26627956 | 2   | <i>CFLAR</i>            | Body;Body;Body       |                                      | 202004766        | -0.19 (0.04)                                    | 2.23E-07 | 9.62E-02        | 1.23E-02 |
| 8    | cg26401512 | 1   | <i>ZNF643</i>           | Body                 |                                      | 40922773         | -0.16 (0.03)                                    | 2.30E-07 | 9.93E-02        | 1.23E-02 |
| 9    | cg06594770 | 22  | <i>TRIOBP</i>           | TSS200               |                                      | 38092974         | 0.36 (0.07)                                     | 2.98E-07 | 1.28E-01        | 1.23E-02 |
| 10   | cg04010122 | 2   | <i>SOS1</i>             | Body                 | N_Shore                              | 39346883         | 0.16 (0.03)                                     | 3.34E-07 | 1.44E-01        | 1.23E-02 |
| 11   | cg13641993 | 9   | <i>FBXO10</i>           | 5'UTR                |                                      | 37559166         | 0.22 (0.04)                                     | 3.43E-07 | 1.48E-01        | 1.23E-02 |
| 12   | cg01462036 | 16  | <i>TBL3</i>             | Body                 | S_Shore                              | 2025868          | -0.13 (0.03)                                    | 3.94E-07 | 1.70E-01        | 1.23E-02 |
| 13   | cg27038634 | 8   | ( <i>LOC101929268</i> ) |                      | N_Shore                              | 49468341         | 0.09 (0.02)                                     | 4.26E-07 | 1.84E-01        | 1.23E-02 |
| 14   | cg01257171 | 5   |                         |                      | S_Shore                              | 172656713        | 0.35 (0.07)                                     | 4.26E-07 | 1.84E-01        | 1.23E-02 |
| 15   | cg02381820 | 2   |                         |                      | Island                               | 121493896        | 0.39 (0.08)                                     | 4.26E-07 | 1.84E-01        | 1.23E-02 |
| 16   | cg21525627 | 12  | ( <i>ZDHHC17</i> )      |                      |                                      | 77149647         | 0.20 (0.04)                                     | 5.28E-07 | 2.28E-01        | 1.42E-02 |
| 17   | cg01706498 | 3   | <i>KLHL6</i>            | Body                 |                                      | 183260375        | 0.14 (0.03)                                     | 6.12E-07 | 2.64E-01        | 1.55E-02 |
| 18   | cg15941159 | 22  | <i>GRAMD4</i>           | 3'UTR                | S_Shore                              | 47075270         | 0.19 (0.04)                                     | 6.98E-07 | 3.01E-01        | 1.67E-02 |
| 19   | cg13153009 | 8   | <i>ZC3H3</i>            | Body                 | N_Shelf                              | 144561626        | -0.60 (0.12)                                    | 7.65E-07 | 3.30E-01        | 1.74E-02 |
| 20   | cg14401837 | 7   | <i>NPSR1</i>            | TSS1500;TSS1500      |                                      | 34697493         | -0.20 (0.04)                                    | 1.04E-06 | 4.49E-01        | 2.16E-02 |
| 21   | cg14795409 | 3   |                         |                      |                                      | 128267611        | -0.17 (0.03)                                    | 1.05E-06 | 4.54E-01        | 2.16E-02 |
| 22   | cg26867987 | 6   | <i>COL11A2</i>          | 3'UTR;3'UTR;3'UTR    | S_Shore                              | 33131450         | -0.14 (0.03)                                    | 1.17E-06 | 5.05E-01        | 2.30E-02 |
| 23   | cg06376715 | 1   | <i>TP73</i>             | Body;Body;Body;Body  | Island                               | 3634918          | 0.08 (0.02)                                     | 1.24E-06 | 5.33E-01        | 2.32E-02 |
| 24   | cg08074767 | 6   | ( <i>MLLT4</i> )        |                      |                                      | 168113741        | -0.09 (0.02)                                    | 1.62E-06 | 6.98E-01        | 2.91E-02 |
| 25   | cg12717591 | 10  | <i>SFMBT2</i>           | 3'UTR                |                                      | 7205138          | 0.36 (0.07)                                     | 1.69E-06 | 7.27E-01        | 2.91E-02 |

|    |            |    |                        |                                           |         |           |              |          |          |          |
|----|------------|----|------------------------|-------------------------------------------|---------|-----------|--------------|----------|----------|----------|
| 26 | cg14240060 | 10 |                        |                                           |         | 130830949 | 0.23 (0.05)  | 1.87E-06 | 8.07E-01 | 3.10E-02 |
| 27 | cg24332767 | 3  | <i>C3orf70</i>         | TSS1500                                   | Island  | 184871524 | 0.12 (0.03)  | 1.99E-06 | 8.58E-01 | 3.18E-02 |
| 28 | cg10822034 | 11 |                        |                                           |         | 10529596  | -0.19 (0.04) | 2.18E-06 | 9.40E-01 | 3.27E-02 |
| 29 | cg13298389 | 7  |                        |                                           |         | 49710144  | 0.47 (0.10)  | 2.20E-06 | 9.47E-01 | 3.27E-02 |
| 30 | cg21126338 | 13 | <i>FARPI</i>           | Body                                      |         | 99084698  | 0.24 (0.05)  | 2.35E-06 | 1.00E+00 | 3.28E-02 |
| 31 | cg17730176 | 17 | <i>TIAF1;MYO18A</i>    | TSS1500;Body;Body                         | N_Shelf | 27404126  | 0.26 (0.05)  | 2.46E-06 | 1.00E+00 | 3.28E-02 |
| 32 | cg13008301 | 20 | <i>CSTF1</i>           | Body;Body;Body                            | Island  | 54978749  | -0.09 (0.02) | 2.52E-06 | 1.00E+00 | 3.28E-02 |
| 33 | cg03174228 | 9  | <i>TTLL11</i>          | Body                                      | N_Shore | 124658583 | 0.07 (0.01)  | 2.55E-06 | 1.00E+00 | 3.28E-02 |
| 34 | cg02431597 | 1  | <i>CACNA1E</i>         | TSS1500                                   | N_Shore | 181452137 | 0.12 (0.03)  | 2.78E-06 | 1.00E+00 | 3.28E-02 |
| 35 | cg06322432 | 10 |                        |                                           | N_Shore | 112289853 | 0.10 (0.02)  | 2.86E-06 | 1.00E+00 | 3.28E-02 |
| 36 | cg00193021 | 4  | <i>SNCA</i>            | 5'UTR;1stExon;5'UTR;1stExon;1stExon;5'UTR | Island  | 90758120  | -0.22 (0.05) | 2.89E-06 | 1.00E+00 | 3.28E-02 |
| 37 | cg14699734 | 19 |                        |                                           | S_Shore | 5806164   | 0.09 (0.02)  | 2.92E-06 | 1.00E+00 | 3.28E-02 |
| 38 | cg20380470 | 10 |                        |                                           | N_Shore | 131987945 | 0.38 (0.08)  | 2.95E-06 | 1.00E+00 | 3.28E-02 |
| 39 | cg12076692 | 1  | <i>GNB1</i>            | Body                                      |         | 1718852   | 0.31 (0.06)  | 3.34E-06 | 1.00E+00 | 3.28E-02 |
| 40 | cg26002437 | 10 | <i>C10orf10;RASSF4</i> | Body;Body                                 | S_Shelf | 45473231  | 0.21 (0.04)  | 3.37E-06 | 1.00E+00 | 3.28E-02 |
| 41 | cg17810765 | 2  | <i>ANO7</i>            | TSS200;TSS200                             |         | 242127836 | 0.11 (0.02)  | 3.38E-06 | 1.00E+00 | 3.28E-02 |
| 42 | cg06526681 | 6  | <i>TSPYL4</i>          | 3'UTR;1stExon                             | N_Shore | 116573109 | -0.15 (0.03) | 3.39E-06 | 1.00E+00 | 3.28E-02 |
| 43 | cg22030032 | 19 | <i>EGLN2</i>           | Body;Body                                 | N_Shelf | 41312792  | 0.11 (0.02)  | 3.44E-06 | 1.00E+00 | 3.28E-02 |
| 44 | cg17989572 | 17 | <i>RAB5C</i>           | 5'UTR;5'UTR                               | N_Shore | 40306700  | -0.39 (0.08) | 3.46E-06 | 1.00E+00 | 3.28E-02 |
| 45 | cg10413089 | 15 | <i>CYFIP1</i>          | 5'UTR                                     |         | 22921426  | 0.19 (0.04)  | 3.58E-06 | 1.00E+00 | 3.28E-02 |
| 46 | cg18704658 | 17 |                        |                                           | N_Shelf | 80300165  | 0.29 (0.06)  | 3.71E-06 | 1.00E+00 | 3.28E-02 |
| 47 | cg02942594 | 19 | <i>LOC148189</i>       | Body                                      | Island  | 28284741  | -0.31 (0.07) | 3.81E-06 | 1.00E+00 | 3.28E-02 |
| 48 | cg26917480 | 17 | <i>ADAP2</i>           | TSS1500                                   | N_Shore | 29247893  | 0.19 (0.04)  | 3.87E-06 | 1.00E+00 | 3.28E-02 |
| 49 | cg18051668 | 17 |                        |                                           | S_Shelf | 55126941  | 0.26 (0.06)  | 3.88E-06 | 1.00E+00 | 3.28E-02 |
| 50 | cg00145141 | 17 | <i>GGT6</i>            | TSS200;TSS200                             |         | 4464022   | -0.18 (0.04) | 3.99E-06 | 1.00E+00 | 3.28E-02 |

Genes in brackets indicate manual annotation for closest genes using the UCSC genome browser on human GRCh37/hg19 assembly. The record highlighted in red indicates the last methylation site significantly associated with the outcome according to Bonferroni correction and the blue highlighted record the last significant according to false-discovery rate.<sup>5</sup> Cell type heterogeneity is accounted for by adjustment for 6 WBC types according to Houseman<sup>10</sup> (see methods section of main manuscript). EWAS model is same as main reference-based EWAS model (see Supplementary Tables S1-S6) but further adjusted for indicator coded variable “Any maternal smoking during pregnancy (y/n)”.

**Supplementary Table S32: Change in fat mass index (kg/m<sup>2</sup>) per percent change in DNA-methylation adj. for maternal smoking in pregnancy (top 50 probes).**

| Rank | CpG ID     | CHR | Gene                                     | UCSC REFGENE GROUP   | RELATION<br>TO UCSC<br>CPG<br>ISLAND | Position<br>(bp) | Change (SE)<br>in FMI<br>per %<br>change<br>in DNAm | P-value  | Bon-<br>ferroni | FDR      |
|------|------------|-----|------------------------------------------|----------------------|--------------------------------------|------------------|-----------------------------------------------------|----------|-----------------|----------|
| 1    | cg13850887 | 2   | <i>SNED1</i>                             | Body                 | S_Shore                              | 241993303        | -0.14 (0.02)                                        | 1.12E-11 | 4.85E-06        | 4.85E-06 |
| 2    | cg26401512 | 1   | <i>ZNF643</i>                            | Body                 |                                      | 40922773         | -0.12 (0.02)                                        | 3.17E-08 | 1.37E-02        | 3.96E-03 |
| 3    | cg15026574 | 3   | <i>ST6GAL1</i>                           | 5'UTR;5'UTR          |                                      | 186683429        | -0.12 (0.02)                                        | 3.34E-08 | 1.44E-02        | 3.96E-03 |
| 4    | cg04010122 | 2   | <i>SOS1</i>                              | Body                 | N_Shore                              | 39346883         | 0.12 (0.02)                                         | 3.67E-08 | 1.58E-02        | 3.96E-03 |
| 5    | cg26627956 | 2   | <i>CFLAR</i>                             | Body;Body;Body       |                                      | 202004766        | -0.14 (0.02)                                        | 8.65E-08 | 3.73E-02        | 7.46E-03 |
| 6    | cg06594770 | 22  | <i>TRIOBP</i>                            | TSS200               |                                      | 38092974         | 0.25 (0.05)                                         | 1.45E-07 | 6.25E-02        | 1.04E-02 |
| 7    | cg14401837 | 7   | <i>NPSR1</i>                             | TSS1500;TSS1500      |                                      | 34697493         | -0.14 (0.03)                                        | 3.06E-07 | 1.32E-01        | 1.76E-02 |
| 8    | cg08692210 | 3   | <i>WDR51A</i>                            | TSS200;TSS200;TSS200 | Island                               | 52188851         | 0.11 (0.02)                                         | 3.58E-07 | 1.55E-01        | 1.76E-02 |
| 9    | cg26867987 | 6   | <i>COL11A2</i><br>( <i>CYTH4-ELFN2</i> ) | 3'UTR;3'UTR;3'UTR    | S_Shore                              | 33131450         | -0.10 (0.02)                                        | 3.81E-07 | 1.64E-01        | 1.76E-02 |
| 10   | cg14518658 | 22  |                                          |                      | N_Shelf                              | 37726676         | 0.06 (0.01)                                         | 4.35E-07 | 1.88E-01        | 1.76E-02 |
| 11   | cg04894009 | 8   | <i>PRKDC</i>                             | Body;Body            |                                      | 48695125         | 0.21 (0.04)                                         | 4.50E-07 | 1.94E-01        | 1.76E-02 |
| 12   | cg00384539 | 8   | <i>PRDM14</i>                            | TSS200               | Island                               | 70983567         | 0.17 (0.03)                                         | 4.99E-07 | 2.15E-01        | 1.79E-02 |
| 13   | cg01706498 | 3   | <i>KLHL6</i>                             | Body                 |                                      | 183260375        | 0.10 (0.02)                                         | 5.68E-07 | 2.45E-01        | 1.88E-02 |
| 14   | cg13641993 | 9   | <i>FBXO10</i>                            | 5'UTR                |                                      | 37559166         | 0.15 (0.03)                                         | 9.94E-07 | 4.29E-01        | 3.06E-02 |
| 15   | cg15941159 | 22  | <i>GRAMD4</i>                            | 3'UTR                | S_Shore                              | 47075270         | 0.13 (0.03)                                         | 1.08E-06 | 4.68E-01        | 3.12E-02 |
| 16   | cg01257171 | 5   |                                          |                      | S_Shore                              | 172656713        | 0.23 (0.05)                                         | 1.19E-06 | 5.14E-01        | 3.21E-02 |
| 17   | cg01462036 | 16  | <i>TBL3</i>                              | Body                 | S_Shore                              | 2025868          | -0.09 (0.02)                                        | 1.58E-06 | 6.82E-01        | 3.84E-02 |
| 18   | cg24093300 | 7   | <i>PTPRN2</i>                            | Body;Body;Body       |                                      | 157543805        | -0.11 (0.02)                                        | 1.60E-06 | 6.92E-01        | 3.84E-02 |
| 19   | cg12717591 | 10  | <i>SFMBT2</i>                            | 3'UTR                |                                      | 7205138          | 0.24 (0.05)                                         | 1.84E-06 | 7.92E-01        | 4.17E-02 |
| 20   | cg10515155 | 17  |                                          |                      | Island                               | 81052671         | -0.08 (0.02)                                        | 2.12E-06 | 9.15E-01        | 4.57E-02 |
| 21   | cg02682525 | 11  | <i>ANKK1</i>                             | TSS1500              | N_Shore                              | 113258277        | 0.08 (0.02)                                         | 2.23E-06 | 9.62E-01        | 4.58E-02 |
| 22   | cg02381820 | 2   |                                          |                      | Island                               | 121493896        | 0.25 (0.05)                                         | 2.36E-06 | 1.00E+00        | 4.63E-02 |
| 23   | cg21525627 | 12  | ( <i>ZDHHC17</i> )                       |                      |                                      | 77149647         | 0.13 (0.03)                                         | 2.76E-06 | 1.00E+00        | 4.97E-02 |
| 24   | cg10413089 | 15  | <i>CYFIP1</i>                            | 5'UTR                |                                      | 22921426         | 0.13 (0.03)                                         | 2.77E-06 | 1.00E+00        | 4.97E-02 |
| 25   | cg02431597 | 1   | <i>CACNA1E</i>                           | TSS1500              | N_Shore                              | 181452137        | 0.08 (0.02)                                         | 3.06E-06 | 1.00E+00        | 5.21E-02 |
| 26   | cg17810765 | 2   | <i>ANO7</i>                              | TSS200;TSS200        |                                      | 242127836        | 0.07 (0.02)                                         | 3.14E-06 | 1.00E+00        | 5.21E-02 |

|    |                 |    |                     |                                                 |         |           |              |          |          |          |
|----|-----------------|----|---------------------|-------------------------------------------------|---------|-----------|--------------|----------|----------|----------|
| 27 | cg06322432      | 10 |                     |                                                 | N_Shore | 112289853 | 0.07 (0.01)  | 3.37E-06 | 1.00E+00 | 5.39E-02 |
| 28 | cg13153009      | 8  | <i>ZC3H3</i>        | Body                                            | N_Shelf | 144561626 | -0.38 (0.08) | 3.77E-06 | 1.00E+00 | 5.60E-02 |
| 29 | cg13298389      | 7  |                     |                                                 |         | 49710144  | 0.31 (0.07)  | 3.89E-06 | 1.00E+00 | 5.60E-02 |
| 30 | cg14795409      | 3  |                     |                                                 |         | 128267611 | -0.11 (0.02) | 3.99E-06 | 1.00E+00 | 5.60E-02 |
| 31 | cg00193021      | 4  | <i>SNCA</i>         | 5'UTR;1stExon;5'UTR;1stExon;1stExon;5'UTR;5'UTR | Island  | 90758120  | -0.15 (0.03) | 4.24E-06 | 1.00E+00 | 5.60E-02 |
| 32 | cg23827531      | 3  | <i>FAM107A</i>      | 1stExon;5'UTR;5'UTR;1stExon                     |         | 58563097  | 0.06 (0.01)  | 4.35E-06 | 1.00E+00 | 5.60E-02 |
| 33 | cg26917480      | 17 | <i>ADAP2</i>        | TSS1500                                         | N_Shore | 29247893  | 0.13 (0.03)  | 4.36E-06 | 1.00E+00 | 5.60E-02 |
| 34 | cg14240060      | 10 |                     |                                                 |         | 130830949 | 0.15 (0.03)  | 4.47E-06 | 1.00E+00 | 5.60E-02 |
| 35 | cg01548142      | 7  |                     |                                                 | N_Shore | 155914873 | -0.27 (0.06) | 4.60E-06 | 1.00E+00 | 5.60E-02 |
| 36 | cg17203352      | 17 | <i>WFIKK2</i>       | TSS200                                          |         | 48912487  | -0.08 (0.02) | 4.79E-06 | 1.00E+00 | 5.60E-02 |
| 37 | cg03549240      | 8  |                     |                                                 | S_Shelf | 42701169  | -0.20 (0.04) | 4.89E-06 | 1.00E+00 | 5.60E-02 |
| 38 | cg14950834      | 19 | <i>SPTBN4;BLVRB</i> | TSS1500;TSS200                                  | Island  | 40971830  | -0.29 (0.06) | 4.96E-06 | 1.00E+00 | 5.60E-02 |
| 39 | cg03012642      | 2  |                     |                                                 |         | 21346892  | -0.10 (0.02) | 5.06E-06 | 1.00E+00 | 5.60E-02 |
| 40 | cg17730176      | 17 | <i>TLAFL;MYO18A</i> | TSS1500;Body;Body                               | N_Shelf | 27404126  | 0.17 (0.04)  | 5.27E-06 | 1.00E+00 | 5.68E-02 |
| 41 | cg22264170      | 6  |                     |                                                 |         | 9722973   | -0.07 (0.02) | 5.52E-06 | 1.00E+00 | 5.81E-02 |
| 42 | cg00082729      | 4  |                     |                                                 |         | 54630659  | -0.02 (0.00) | 5.83E-06 | 1.00E+00 | 5.89E-02 |
| 43 | cg26393837      | 11 | <i>PCSK7</i>        | Body                                            | N_Shelf | 117099918 | 0.16 (0.04)  | 6.01E-06 | 1.00E+00 | 5.89E-02 |
| 44 | cg17989572      | 17 | <i>RAB5C</i>        | 5'UTR;5'UTR                                     | N_Shore | 40306700  | -0.26 (0.06) | 6.02E-06 | 1.00E+00 | 5.89E-02 |
| 45 | cg24751284      | 14 | <i>APEX1</i>        | Body;Body;Body                                  | S_Shore | 20925551  | 0.12 (0.03)  | 6.38E-06 | 1.00E+00 | 5.89E-02 |
| 46 | cg02942594      | 19 | <i>LOC148189</i>    | Body                                            | Island  | 28284741  | -0.21 (0.05) | 6.41E-06 | 1.00E+00 | 5.89E-02 |
| 47 | ch.22.46830341F | 22 |                     |                                                 |         | 48451677  | -0.22 (0.05) | 6.67E-06 | 1.00E+00 | 5.89E-02 |
| 48 | cg18051668      | 17 |                     |                                                 | S_Shelf | 55126941  | 0.17 (0.04)  | 6.71E-06 | 1.00E+00 | 5.89E-02 |
| 49 | cg07342901      | 11 | <i>H19;MIR675</i>   | Body;TSS1500                                    | N_Shore | 2018724   | 0.11 (0.02)  | 6.91E-06 | 1.00E+00 | 5.89E-02 |
| 50 | cg24611315      | 10 |                     |                                                 |         | 75704459  | -0.16 (0.03) | 6.94E-06 | 1.00E+00 | 5.89E-02 |

Genes in brackets indicate manual annotation for closest genes using the UCSC genome browser on human GRCh37/hg19 assembly. The record highlighted in red indicates the last methylation site significantly associated with the outcome according to Bonferroni correction and the blue highlighted record the last significant according to false-discovery rate.<sup>5</sup> Cell type heterogeneity is accounted for by adjustment for 6 WBC types according to Houseman<sup>10</sup> (see methods section of main manuscript). EWAS model is same as main reference-based EWAS model (see Supplementary Tables S1-S6) but further adjusted for indicator coded variable “Any maternal smoking during pregnancy (y/n)”.



**Supplementary Table S33: Change in fat free mass (kg) per percent change in DNA-methylation adj. for maternal smoking during pregnancy (top 50 probes).**

| Rank | CpG ID     | CHR | Gene                | UCSC REFGENE GROUP  | RELATION<br>TO UCSC<br>CPG<br>ISLAND | Position<br>(bp) | Change<br>(SE)<br>in FFM<br>per %<br>change<br>in DNAm | P-value  | Bon-<br>ferroni | FDR      |
|------|------------|-----|---------------------|---------------------|--------------------------------------|------------------|--------------------------------------------------------|----------|-----------------|----------|
| 1    | cg27038634 | 8   | (LOC101929268)      |                     | N_Shore                              | 49468341         | 0.13 (0.02)                                            | 1.00E-08 | 4.32E-03        | 4.32E-03 |
| 2    | cg08074767 | 6   | (MLLT4)             |                     |                                      | 168113741        | -0.15 (0.03)                                           | 3.27E-08 | 1.41E-02        | 6.95E-03 |
| 3    | cg24332767 | 3   | C3orf70             | TSS1500             | Island                               | 184871524        | 0.20 (0.04)                                            | 4.84E-08 | 2.09E-02        | 6.95E-03 |
| 4    | cg21126338 | 13  | FARP1               | Body                |                                      | 99084698         | 0.38 (0.07)                                            | 1.16E-07 | 5.00E-02        | 1.25E-02 |
| 5    | cg10135753 | 19  | BRSK1               | Body                | S_Shore                              | 55817121         | 0.20 (0.04)                                            | 1.87E-07 | 8.06E-02        | 1.49E-02 |
| 6    | cg07719679 | 7   | STEAP4              | TSS200              |                                      | 87936392         | 0.18 (0.03)                                            | 2.08E-07 | 8.96E-02        | 1.49E-02 |
| 7    | cg21525627 | 12  | (ZDHHC17)           |                     |                                      | 77149647         | 0.28 (0.05)                                            | 5.42E-07 | 2.34E-01        | 3.19E-02 |
| 8    | cg06376715 | 1   | TP73                | Body;Body;Body;Body | Island                               | 3634918          | 0.12 (0.02)                                            | 6.60E-07 | 2.85E-01        | 3.19E-02 |
| 9    | cg25827873 | 8   | (ERIC1)             |                     |                                      | 593655           | -0.11 (0.02)                                           | 7.30E-07 | 3.15E-01        | 3.19E-02 |
| 10   | cg01577646 | 6   | RPS6KA2             | Body;Body           |                                      | 166911121        | -0.21 (0.04)                                           | 7.40E-07 | 3.19E-01        | 3.19E-02 |
| 11   | cg02393428 | 12  |                     |                     |                                      | 106582432        | 0.14 (0.03)                                            | 1.25E-06 | 5.38E-01        | 3.93E-02 |
| 12   | cg16312900 | 17  | SPATA20             | Body                | S_Shelf                              | 48628397         | 0.12 (0.03)                                            | 1.59E-06 | 6.84E-01        | 3.93E-02 |
| 13   | cg09229893 | 14  | BMP4                | TSS1500;TSS1500     | S_Shore                              | 54423811         | 0.12 (0.02)                                            | 1.61E-06 | 6.94E-01        | 3.93E-02 |
| 14   | cg26618041 | 19  | CILP2               | Body                | Island                               | 19651867         | 0.21 (0.04)                                            | 1.76E-06 | 7.59E-01        | 3.93E-02 |
| 15   | cg26662102 | 1   | AJAPI               | Body;Body           |                                      | 4758079          | -0.19 (0.04)                                           | 1.78E-06 | 7.70E-01        | 3.93E-02 |
| 16   | cg12466919 | 5   | SQSTM1              | Body;Body;Body      | S_Shelf                              | 179251000        | 0.21 (0.04)                                            | 1.80E-06 | 7.78E-01        | 3.93E-02 |
| 17   | cg03810768 | 2   | EDAR                | TSS200              |                                      | 109606018        | 0.12 (0.02)                                            | 1.94E-06 | 8.39E-01        | 3.93E-02 |
| 18   | cg26995653 | 2   | (LINC01115(TMEM18)) |                     |                                      | 858038           | 0.13 (0.03)                                            | 2.00E-06 | 8.63E-01        | 3.93E-02 |
| 19   | cg26432350 | 3   | NBEAL2              | Body                |                                      | 47040357         | 0.24 (0.05)                                            | 2.09E-06 | 9.00E-01        | 3.93E-02 |
| 20   | cg26721877 | 5   | STC2                | TSS1500             | Island                               | 172757074        | 0.22 (0.05)                                            | 2.11E-06 | 9.11E-01        | 3.93E-02 |
| 21   | cg26360930 | 8   | DLC1                | Body;Body;Body      |                                      | 12952504         | -0.20 (0.04)                                           | 2.13E-06 | 9.19E-01        | 3.93E-02 |
| 22   | cg14699734 | 19  |                     |                     | S_Shore                              | 5806164          | 0.13 (0.03)                                            | 2.15E-06 | 9.28E-01        | 3.93E-02 |
| 23   | cg21393818 | 17  |                     |                     |                                      | 76626270         | -0.37 (0.08)                                           | 2.15E-06 | 9.29E-01        | 3.93E-02 |
| 24   | cg05822345 | 11  | B3GAT1              | 5'UTR;5'UTR         | S_Shore                              | 134257744        | -0.23 (0.05)                                           | 2.32E-06 | 1.00E+00        | 3.93E-02 |
| 25   | cg26967755 | 16  | KATNB1              | Body                | S_Shelf                              | 57773694         | -0.20 (0.04)                                           | 2.33E-06 | 1.00E+00        | 3.93E-02 |

|    |            |    |                          |             |         |           |              |          |          |          |
|----|------------|----|--------------------------|-------------|---------|-----------|--------------|----------|----------|----------|
| 26 | cg03174228 | 9  | <i>TTLI1</i>             | Body        | N_Shore | 124658583 | 0.10 (0.02)  | 2.37E-06 | 1.00E+00 | 3.93E-02 |
| 27 | cg01646784 | 22 | <i>LGALS2</i>            | TSS1500     |         | 37976725  | 0.18 (0.04)  | 2.61E-06 | 1.00E+00 | 3.96E-02 |
| 28 | cg17511933 | 2  | <i>GLI2</i>              | Body        |         | 121712960 | 0.57 (0.12)  | 2.66E-06 | 1.00E+00 | 3.96E-02 |
| 29 | cg12076692 | 1  | <i>GNB1</i>              | Body        |         | 1718852   | 0.43 (0.09)  | 2.80E-06 | 1.00E+00 | 3.96E-02 |
| 30 | cg17935297 | 19 | <i>CILP2</i>             | Body        | Island  | 19651968  | 0.42 (0.09)  | 2.92E-06 | 1.00E+00 | 3.96E-02 |
| 31 | cg02747253 | 14 |                          |             | Island  | 105662805 | -0.32 (0.07) | 3.04E-06 | 1.00E+00 | 3.96E-02 |
| 32 | cg16586518 | 3  | <i>NBEAL2</i>            | Body        |         | 47040214  | 0.18 (0.04)  | 3.04E-06 | 1.00E+00 | 3.96E-02 |
| 33 | cg25371332 | 2  |                          |             |         | 10688317  | 0.21 (0.04)  | 3.09E-06 | 1.00E+00 | 3.96E-02 |
| 34 | cg02532700 | 22 | <i>NCF4</i>              | Body;Body   |         | 37257404  | 0.11 (0.02)  | 3.20E-06 | 1.00E+00 | 3.96E-02 |
| 35 | cg26413162 | 1  |                          |             |         | 23289818  | 0.29 (0.06)  | 3.21E-06 | 1.00E+00 | 3.96E-02 |
| 36 | cg06410191 | 5  | <i>LVRN</i>              | 1stExon     | Island  | 115298920 | 0.24 (0.05)  | 3.35E-06 | 1.00E+00 | 4.01E-02 |
| 37 | cg20380470 | 10 |                          |             | N_Shore | 131987945 | 0.53 (0.11)  | 3.73E-06 | 1.00E+00 | 4.35E-02 |
| 38 | cg24667304 | 1  | <i>WDR8</i>              | Body        |         | 3550008   | 0.31 (0.07)  | 3.89E-06 | 1.00E+00 | 4.41E-02 |
| 39 | cg06318624 | 2  |                          |             |         | 174913188 | 0.12 (0.03)  | 3.98E-06 | 1.00E+00 | 4.41E-02 |
| 40 | cg02381820 | 2  |                          |             | Island  | 121493896 | 0.50 (0.11)  | 4.29E-06 | 1.00E+00 | 4.54E-02 |
| 41 | cg25901204 | 15 | <i>ISL2</i>              | TSS1500     | N_Shore | 76628858  | 0.22 (0.05)  | 4.42E-06 | 1.00E+00 | 4.54E-02 |
| 42 | cg04813904 | 5  | <i>CD180</i>             | Body        |         | 66488838  | 0.15 (0.03)  | 4.44E-06 | 1.00E+00 | 4.54E-02 |
| 43 | cg13412615 | 11 | <i>KCNK4</i>             | TSS1500     | N_Shore | 64057807  | -0.19 (0.04) | 4.66E-06 | 1.00E+00 | 4.54E-02 |
| 44 | cg01835725 | 3  | <i>PCBP4</i>             | TSS1500     |         | 52002500  | 0.15 (0.03)  | 4.72E-06 | 1.00E+00 | 4.54E-02 |
| 45 | cg06369443 | 1  | <i>KCNQ4</i>             | Body;Body   | N_Shore | 41303048  | 0.36 (0.08)  | 4.84E-06 | 1.00E+00 | 4.54E-02 |
| 46 | cg24301690 | 3  | <i>KIAA1257</i>          | 5'UTR       | Island  | 128712676 | 0.12 (0.03)  | 5.08E-06 | 1.00E+00 | 4.54E-02 |
| 47 | cg01706498 | 3  | <i>KLHL6</i>             | Body        |         | 183260375 | 0.18 (0.04)  | 5.28E-06 | 1.00E+00 | 4.54E-02 |
| 48 | cg14391016 | 6  | <i>CCR6</i>              | TSS1500     |         | 167523797 | 0.25 (0.05)  | 5.33E-06 | 1.00E+00 | 4.54E-02 |
| 49 | cg04269848 | 2  | <i>AGAP1</i>             | Body;Body   |         | 236846527 | 0.15 (0.03)  | 5.34E-06 | 1.00E+00 | 4.54E-02 |
| 50 | cg23299109 | 7  | <i>SLC26A4;LOC286002</i> | TSS200;Body | N_Shore | 107301010 | 0.17 (0.04)  | 5.35E-06 | 1.00E+00 | 4.54E-02 |

Genes in brackets indicate manual annotation for closest genes using the UCSC genome browser on human GRCh37/hg19 assembly. The record highlighted in red indicates the last methylation site significantly associated with the outcome according to Bonferroni correction and the blue highlighted record the last significant according to false-discovery rate.<sup>5</sup> Cell type heterogeneity is accounted for by adjustment for 6 WBC types according to Houseman<sup>10</sup> (see methods section of main manuscript). EWAS model is same as main reference-based EWAS model (see Supplementary Tables S1-S6) but further adjusted for indicator coded variable “Any maternal smoking during pregnancy (y/n)”.

**Supplementary Table S34: Change in fat free mass index (kg/m<sup>2</sup>) per percent change in DNA-methylation adj. for matern. smoking during pregnancy (top 50).**

| Rank | CpG ID     | CHR | Gene                                     | UCSC REFGENE GROUP              | RELATION<br>TO UCSC<br>CPG<br>ISLAND | Position<br>(bp) | Change (SE)<br>in FFMI<br>per %<br>change<br>in DNAm | P-value  | Bon-<br>ferroni | FDR      |
|------|------------|-----|------------------------------------------|---------------------------------|--------------------------------------|------------------|------------------------------------------------------|----------|-----------------|----------|
| 1    | cg17935297 | 19  | <i>CILP2</i>                             | Body                            | Island                               | 19651968         | 0.24 (0.04)                                          | 4.42E-08 | 1.91E-02        | 1.91E-02 |
| 2    | cg06437396 | 6   | ( <i>OSTM1</i> )                         |                                 | N_Shore                              | 108437013        | 0.12 (0.02)                                          | 1.94E-07 | 8.36E-02        | 3.38E-02 |
| 3    | cg26995653 | 2   | ( <i>LINC01115</i><br>( <i>TMEM18</i> )) |                                 |                                      | 858038           | 0.07 (0.01)                                          | 3.14E-07 | 1.36E-01        | 3.38E-02 |
| 4    | cg25048701 | 11  | <i>FOLR1</i>                             | 5'UTR;TSS1500;5'UTR;5'UTR       |                                      | 71902284         | 0.26 (0.05)                                          | 4.69E-07 | 2.02E-01        | 3.38E-02 |
| 5    | cg08074767 | 6   | ( <i>MLLT4</i> )                         |                                 |                                      | 168113741        | -0.07 (0.01)                                         | 5.29E-07 | 2.28E-01        | 3.38E-02 |
| 6    | cg13718870 | 9   | <i>BRD3</i>                              | 5'UTR                           | Island                               | 136919144        | -0.07 (0.01)                                         | 5.43E-07 | 2.34E-01        | 3.38E-02 |
| 7    | cg21525627 | 12  | ( <i>ZDHHC17</i> )                       |                                 |                                      | 77149647         | 0.13 (0.03)                                          | 5.49E-07 | 2.37E-01        | 3.38E-02 |
| 8    | cg26618041 | 19  | <i>CILP2</i>                             | Body                            | Island                               | 19651867         | 0.10 (0.02)                                          | 6.68E-07 | 2.88E-01        | 3.48E-02 |
| 9    | cg15914340 | 2   | ( <i>TSSC1</i> )                         |                                 |                                      | 3192619          | 0.30 (0.06)                                          | 7.26E-07 | 3.13E-01        | 3.48E-02 |
| 10   | cg01706498 | 3   | <i>KLHL6</i>                             | Body                            |                                      | 183260375        | 0.10 (0.02)                                          | 8.42E-07 | 3.63E-01        | 3.63E-02 |
| 11   | cg21126338 | 13  | <i>FARP1</i>                             | Body                            |                                      | 99084698         | 0.17 (0.03)                                          | 1.34E-06 | 5.77E-01        | 5.22E-02 |
| 12   | cg02393428 | 12  |                                          |                                 |                                      | 106582432        | 0.07 (0.01)                                          | 1.45E-06 | 6.26E-01        | 5.22E-02 |
| 13   | cg19864468 | 2   | <i>CHCHD5</i>                            | 3'UTR                           |                                      | 113346566        | 0.16 (0.03)                                          | 1.72E-06 | 7.40E-01        | 5.69E-02 |
| 14   | cg26662102 | 1   | <i>AJAPI</i>                             | Body;Body                       |                                      | 4758079          | -0.09 (0.02)                                         | 1.96E-06 | 8.44E-01        | 5.97E-02 |
| 15   | cg00037763 | 18  | <i>SETBP1</i>                            | Body;Body                       |                                      | 42281763         | -0.12 (0.03)                                         | 2.07E-06 | 8.95E-01        | 5.97E-02 |
| 16   | cg04458776 | 11  | <i>SLC22A6</i>                           | TSS1500;TSS1500;TSS1500;TSS1500 |                                      | 62753944         | -0.06 (0.01)                                         | 2.22E-06 | 9.58E-01        | 5.98E-02 |
| 17   | cg18704658 | 17  |                                          |                                 | N_Shelf                              | 80300165         | 0.20 (0.04)                                          | 2.53E-06 | 1.00E+00        | 6.42E-02 |
| 18   | cg13345817 | 15  |                                          |                                 |                                      | 101695660        | 0.16 (0.03)                                          | 2.72E-06 | 1.00E+00        | 6.53E-02 |
| 19   | cg14524775 | 1   | <i>ARHGEF2</i>                           | Body;Body;Body                  | Island                               | 155920832        | 0.39 (0.08)                                          | 2.90E-06 | 1.00E+00        | 6.58E-02 |
| 20   | cg07719679 | 7   | <i>STEAP4</i>                            | TSS200                          |                                      | 87936392         | 0.08 (0.02)                                          | 3.11E-06 | 1.00E+00        | 6.66E-02 |
| 21   | cg17644856 | 2   |                                          |                                 |                                      | 10687962         | 0.06 (0.01)                                          | 3.45E-06 | 1.00E+00        | 6.66E-02 |
| 22   | cg13749070 | 15  | <i>IGF1R</i>                             | Body                            |                                      | 99451935         | 0.36 (0.08)                                          | 3.77E-06 | 1.00E+00        | 6.66E-02 |
| 23   | cg24751284 | 14  | <i>APEX1</i>                             | Body;Body;Body                  | S_Shore                              | 20925551         | 0.12 (0.03)                                          | 3.99E-06 | 1.00E+00        | 6.66E-02 |
| 24   | cg17989572 | 17  | <i>RAB5C</i>                             | 5'UTR;5'UTR                     | N_Shore                              | 40306700         | -0.26 (0.06)                                         | 4.06E-06 | 1.00E+00        | 6.66E-02 |
| 25   | cg11817057 | 6   |                                          |                                 | Island                               | 29924202         | 0.15 (0.03)                                          | 4.34E-06 | 1.00E+00        | 6.66E-02 |

|    |               |    |                |                          |         |           |              |          |          |          |
|----|---------------|----|----------------|--------------------------|---------|-----------|--------------|----------|----------|----------|
| 26 | cg06369443    | 1  | <i>KCNQ4</i>   | Body;Body                | N_Shore | 41303048  | 0.18 (0.04)  | 4.46E-06 | 1.00E+00 | 6.66E-02 |
| 27 | cg14391016    | 6  | <i>CCR6</i>    | TSS1500                  |         | 167523797 | 0.12 (0.03)  | 4.56E-06 | 1.00E+00 | 6.66E-02 |
| 28 | cg17421241    | 1  | <i>PRDM16</i>  | Body;Body                | N_Shore | 3201953   | -0.07 (0.02) | 4.61E-06 | 1.00E+00 | 6.66E-02 |
| 29 | cg18282392    | 4  | <i>GALNT7</i>  | Body                     |         | 174166207 | -0.11 (0.02) | 4.65E-06 | 1.00E+00 | 6.66E-02 |
| 30 | cg22213057    | 7  | <i>PTPRN2</i>  | Body;Body;Body           | S_Shore | 157697240 | -0.16 (0.03) | 5.29E-06 | 1.00E+00 | 6.66E-02 |
| 31 | cg02518775    | 11 | <i>CNIH2</i>   | Body                     | S_Shore | 66046770  | 0.08 (0.02)  | 5.44E-06 | 1.00E+00 | 6.66E-02 |
| 32 | cg11475880    | X  | <i>IQSEC2</i>  | Body;Body                | Island  | 53283947  | 0.10 (0.02)  | 5.64E-06 | 1.00E+00 | 6.66E-02 |
| 33 | cg26401512    | 1  | <i>ZNF643</i>  | Body                     |         | 40922773  | -0.10 (0.02) | 6.09E-06 | 1.00E+00 | 6.66E-02 |
| 34 | cg17259183    | 10 | <i>NKX6-2</i>  | TSS1500                  | Island  | 134599984 | 0.08 (0.02)  | 6.32E-06 | 1.00E+00 | 6.66E-02 |
| 35 | cg26360930    | 8  | <i>DLC1</i>    | Body;Body;Body           |         | 12952504  | -0.09 (0.02) | 6.39E-06 | 1.00E+00 | 6.66E-02 |
| 36 | cg17481047    | 10 |                |                          | Island  | 134692852 | 0.06 (0.01)  | 6.57E-06 | 1.00E+00 | 6.66E-02 |
| 37 | cg04813904    | 5  | <i>CD180</i>   | Body                     |         | 66488838  | 0.07 (0.02)  | 6.57E-06 | 1.00E+00 | 6.66E-02 |
| 38 | cg25371332    | 2  |                |                          |         | 10688317  | 0.10 (0.02)  | 6.82E-06 | 1.00E+00 | 6.66E-02 |
| 39 | cg17287326    | 10 | <i>AVPI1</i>   | 5'UTR;1stExon            | Island  | 99446966  | 0.17 (0.04)  | 6.90E-06 | 1.00E+00 | 6.66E-02 |
| 40 | ch.8.1234861F | 8  | <i>XKR4</i>    | Body                     |         | 56321773  | -0.44 (0.10) | 7.05E-06 | 1.00E+00 | 6.66E-02 |
| 41 | cg23577562    | 4  | <i>RGS12</i>   | Body;Body                |         | 3324940   | 0.27 (0.06)  | 7.07E-06 | 1.00E+00 | 6.66E-02 |
| 42 | cg24332767    | 3  | <i>C3orf70</i> | TSS1500                  | Island  | 184871524 | 0.08 (0.02)  | 7.13E-06 | 1.00E+00 | 6.66E-02 |
| 43 | cg00271204    | 5  |                |                          | N_Shore | 139142898 | 0.09 (0.02)  | 7.16E-06 | 1.00E+00 | 6.66E-02 |
| 44 | cg17459290    | 1  | <i>LGALS8</i>  | Body;Body;Body;Body      |         | 236707000 | 0.15 (0.03)  | 7.33E-06 | 1.00E+00 | 6.66E-02 |
| 45 | cg12321193    | 13 | <i>EDNRB</i>   | TSS1500                  |         | 78550384  | -0.09 (0.02) | 7.43E-06 | 1.00E+00 | 6.66E-02 |
| 46 | cg06410191    | 5  | <i>LVRN</i>    | 1stExon                  | Island  | 115298920 | 0.11 (0.02)  | 7.58E-06 | 1.00E+00 | 6.66E-02 |
| 47 | cg10861407    | 9  | <i>FSD1L</i>   | TSS1500;TSS1500;TSS1500  | N_Shore | 108209278 | -0.13 (0.03) | 7.72E-06 | 1.00E+00 | 6.66E-02 |
| 48 | cg22078907    | 17 | <i>USP22</i>   | Body                     |         | 20920756  | 0.18 (0.04)  | 7.74E-06 | 1.00E+00 | 6.66E-02 |
| 49 | cg00701992    | 19 | <i>PNPLA6</i>  | Body;Body;Body;Body;Body | Island  | 7621749   | -0.27 (0.06) | 7.85E-06 | 1.00E+00 | 6.66E-02 |
| 50 | cg25554998    | 11 |                |                          | N_Shore | 1227771   | -0.07 (0.02) | 7.91E-06 | 1.00E+00 | 6.66E-02 |

Genes in brackets indicate manual annotation for closest genes using the UCSC genome browser on human GRCh37/hg19 assembly. The record highlighted in red indicates the last methylation site significantly associated with the outcome according to Bonferroni correction and the blue highlighted record the last significant according to false-discovery rate.<sup>5</sup> Cell type heterogeneity is accounted for by adjustment for 6 WBC types according to Houseman<sup>10</sup> (see methods section of main manuscript). EWAS model is same as main reference-based EWAS model (see Supplementary Tables S1-S6) but further adjusted for indicator coded variable “Any maternal smoking during pregnancy (y/n)”.

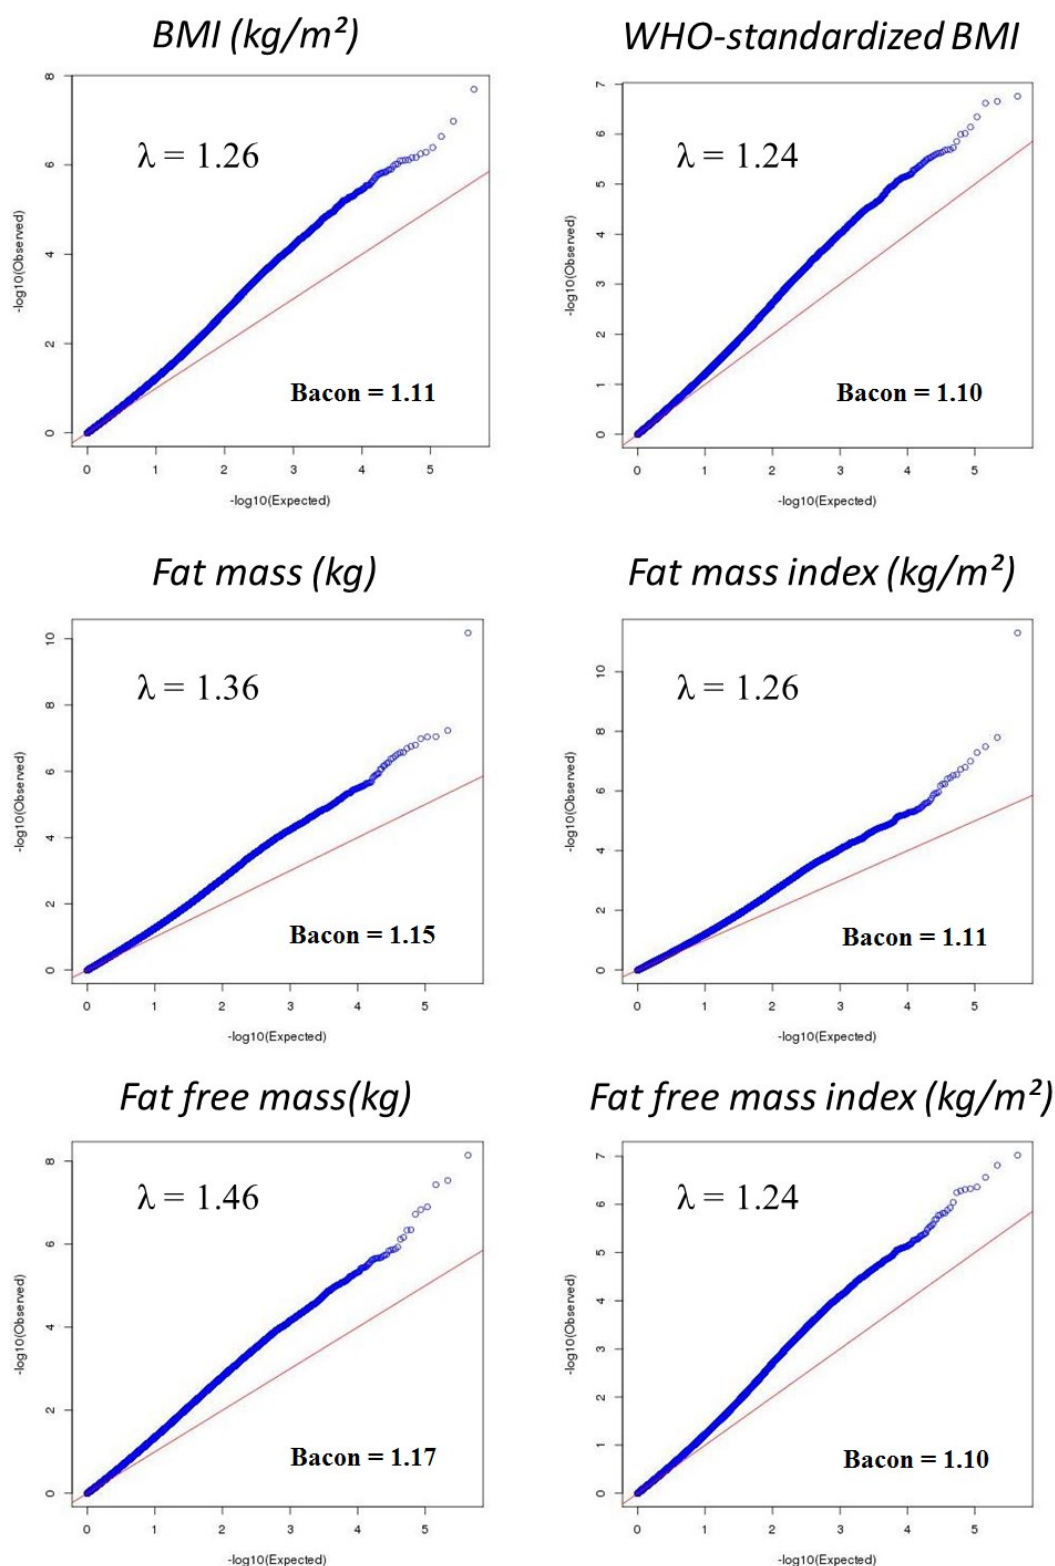

**Supplementary Figure S1: Quantile-Quantile Plot of observed vs. expected  $-\log_{10}$  P-values for each of the 6 outcomes.** Q-Q-plots resulting from the regression of respective phenotype on each of 431313 CpG sites and adjustment variables in 374 preschool children. Main blood-referencebased EWAS models in the CHOP study.<sup>10</sup> Lambda ( $\lambda$ ) is inflation factor according to genomic control method<sup>8</sup> and Bacon is inflation factor accounting for number of significant associations.<sup>9</sup>

## References of the online supplement

1. Reimand, J. *et al.* g:Profiler-a web server for functional interpretation of gene lists (2016 update). *Nucleic Acids Res* **44**, W83-9 (2016).
2. Huang, R.C. *et al.* Genome-wide methylation analysis identifies differentially methylated CpG loci associated with severe obesity in childhood. *Epigenetics* **10**, 995-1005 (2015).
3. Wahl, S. *et al.* Epigenome-wide association study of body mass index, and the adverse outcomes of adiposity. *Nature* **541**, 81-86 (2017).
4. Gaunt, T.R. *et al.* Systematic identification of genetic influences on methylation across the human life course. *Genome Biol* **17**, 61 (2016).
5. Benjamini, Y. & Hochberg, Y. Controlling the False Discovery Rate - a Practical and Powerful Approach to Multiple Testing. *Journal of the Royal Statistical Society Series B-Methodological* **57**, 289-300 (1995).
6. Houseman, E.A. *et al.* Reference-free deconvolution of DNA methylation data and mediation by cell composition effects. *BMC Bioinformatics* **17**, 259 (2016).
7. Houseman, E.A., Molitor, J. & Marsit, C.J. Reference-free cell mixture adjustments in analysis of DNA methylation data. *Bioinformatics* **30**, 1431-9 (2014).
8. Devlin, B. & Roeder, K. Genomic control for association studies. *Biometrics* **55**, 997-1004 (1999).
9. van Iterson, M., van Zwet, E.W., Consortium, B. & Heijmans, B.T. Controlling bias and inflation in epigenome- and transcriptome-wide association studies using the empirical null distribution. *Genome Biol* **18**, 19 (2017).
10. Houseman, E.A. *et al.* DNA methylation arrays as surrogate measures of cell mixture distribution. *BMC Bioinformatics* **13**, 86 (2012).
